# Supplementary material for: Characterization of Carotenoid-protein Complexes and Gene Expression Analysis Associated with Carotenoid Sequestration in Pigmented Cassava (Manihot Esculenta Crantz) Storage Root
Source: PubMed Central journal article supplement — Open Biochem J. 2012 Nov 26;6:116–30. doi: 10.2174/1874091X01206010116 (PMC3514709; doi:10.2174/1874091x01206010116), 2012-11-26
Supplement: TOBIOCJ-6-116_SD1.pdf [file TOBIOCJ-6-116_SD1.pdf]

## SUPPLEMENTAL DATA

ADDITIONAL SUPPORTING INFORMATION MAY BE FOUND IN THE ONLINE VERSION OF THIS ARTICLE

**Table S1. Supplementary Data: Listing Primers for Genes Sequences Coding for Identified Proteins in the Carotenoid-protein Complex Used for their Expression Analysis Across Distinct Genotypes of Cassava using RT\_PCR**

| Protein ID | EST ID in ESTIMA Data Base | Primer Name   | Strand  | Primer Sequence          | gc% | Amplicon Size (bp) |
|------------|----------------------------|---------------|---------|--------------------------|-----|--------------------|
| Fibrillin  | cassava.162.C1.Contig223   | CasFibr_432RL | Reverse | CGGCGAGTCAAGAGTGAGCTGCCG | 60  |                    |
| Fibrillin  | cassava.162.C1.Contig223   | CasFibr_432FL | Forward | TCATGGTTGCTGACCACATACCT  | 48  | 107                |
| Or-protein | cassava.695.C1.Contig835   | CasDNAj.R     | Reverse | CATGAAATCAAACAGCCCACG    | 48  |                    |
| Or-protein | cassava.695.C1.Contig835   | CasDNAj.F     | Forward | ACAACAAGGCCCATGAGTCTGA   | 50  | 120                |
| HSP 17.4   | cassava.2670.C1.Contig2792 | HSP17.4.R1.F  | Forward | CACCATTTCAGGAAAGTTACCG   | 46  |                    |
| HSP 17.4   | cassava.2670.C1.Contig2792 | HSP17.4.R1.R  | Reverse | TGATGAGTGAGGTGCATGGAGA   | 50  | 115                |
| HSP 17.6   | Cassava.1764.C1.Contig1943 | HSP17.6.R1.R  | Reverse | CGGCGAGTCAAGAGTGAGCTGCCG | 67  |                    |
| HSP 17.6   | Cassava.1764.C1.Contig1943 | HSP17.6.R1.F  | Forward | TCATGGTTGCTGACCACATACCT  | 48  | 89                 |
| HSP 18.1   | Cassava.388.C1.Contig493   | HSP18.1.R1.R  | Reverse | CGGCGAGTCAAGAGTGAGCTGCCG | 67  |                    |
| HSP 18.1   | Cassava.388.C1.Contig493   | HSP18.1.R1.F  | Forward | TCATGGTTGCTGACCACATACCT  | 48  | 92                 |
| HSP21      | Cassava.1282.C1.Contig1455 | HSP21.F       | Reverse | CGGCGAGTCAAGAGTGAGCTGCCG | 70  |                    |
| HSP21      | Cassava.1282.C1.Contig1455 | HSP21.R       | Forward | TCATGGTTGCTGACCACATACCT  | 48  | 116                |

**Table S2. Supplementary Data: Listing Peptides Sequences (MASCOT Quality) in the Carotenoid-protein Complex. SDS\_PAGE Picture Shows the Gel Zone Fractionation of Separated Proteins used for the LC\_MS/MS Analysis**

| SDS_PAGE Zone Code | Accession    | Query | Score  | Observed | Mr (expt) | Mr (calc) | Delta | Miss | Score | Expect | Rank | Peptide Sequence |
|--------------------|--------------|-------|--------|----------|-----------|-----------|-------|------|-------|--------|------|------------------|
| DCP1B2             | gi 106778064 | 286   | 70.31  | 592.35   | 1182.69   | 1182.71   | -0.02 | 0    | 70.31 | 0.00   | 4    | NLQISILLNR       |
| DCP1B1             | gi 108897757 | 382   | 183.09 | 651.32   | 1300.63   | 1300.65   | -0.02 | 0    | 71.09 | 0.00   | 1    | ALEENADLEVK      |
| DCP1B3             | gi 108897757 | 13    | 183.09 | 404.20   | 806.39    | 806.39    | 0.00  | 0    | 25.50 | 135.78 | 5    | LAADDFR          |
| DCP1B1             | gi 108897757 | 14    | 183.09 | 404.20   | 806.39    | 806.39    | 0.00  | 0    | 31.97 | 28.05  | 2    | LAADDFR          |
| DCP1B2             | gi 108897757 | 15    | 183.09 | 404.21   | 806.40    | 806.39    | 0.01  | 0    | 33.80 | 18.52  | 2    | LAADDFR          |
| DCP1B2             | gi 108897757 | 17    | 183.09 | 405.22   | 808.42    | 808.43    | -0.01 | 0    | 39.34 | 5.76   | 2    | LASYLDK          |
| DCP1B3             | gi 108897757 | 128   | 183.09 | 497.25   | 992.48    | 992.49    | -0.02 | 0    | 28.12 | 63.80  | 3    | YENELGLR         |
| DCP1B2             | gi 108897757 | 129   | 183.09 | 497.25   | 992.48    | 992.49    | -0.01 | 0    | 38.86 | 5.52   | 2    | YENELGLR         |
| DCP1B1             | gi 108897757 | 130   | 183.09 | 497.25   | 992.49    | 992.49    | -0.01 | 0    | 36.29 | 10.42  | 2    | YENELGLR         |
| DCP1B1             | gi 10943042  | 26    | 142.62 | 421.26   | 840.50    | 840.51    | -0.01 | 1    | 25.22 | 78.84  | 5    | ADLPGLKK         |
| DCP1B1             | gi 10943042  | 117   | 142.62 | 487.77   | 973.53    | 973.53    | 0.00  | 1    | 35.74 | 13.59  | 2    | FRLPENAK         |
| DCP1B1             | gi 10943042  | 567   | 142.62 | 586.64   | 1756.89   | 1756.90   | 0.00  | 1    | 29.75 | 26.18  | 3    | VEVEEDRVLQISGER  |
| DCP1B2             | gi 10943042  | 74    | 142.62 | 451.25   | 900.49    | 900.50    | -0.02 | 0    | 51.91 | 0.39   | 5    | VLQISGER         |
| DCP1B3             | gi 10943042  | 75    | 142.62 | 451.25   | 900.49    | 900.50    | -0.01 | 0    | 51.07 | 0.46   | 5    | VLQISGER         |
| DCP1B1             | gi 10943042  | 76    | 142.62 | 451.26   | 900.50    | 900.50    | -0.01 | 0    | 45.86 | 1.51   | 5    | VLQISGER         |

Table S2. Contd.....

| SDS_PAGE<br>Zone Code | Accession    | Query | Score  | Observed | Mr (expt) | Mr (calc) | Delta | Miss | Score | Expect  | Rank | Peptide Sequence |
|-----------------------|--------------|-------|--------|----------|-----------|-----------|-------|------|-------|---------|------|------------------|
| DCP1B1                | gi 10943042  | 77    | 142.62 | 451.26   | 900.51    | 900.50    | 0.00  | 0    | 51.27 | 0.41    | 5    | VLQISGER         |
| DCP1B3                | gi 110152466 | 306   | 57.73  | 599.28   | 1196.55   | 1196.55   | 0.00  | 1    | 9.12  | 3064.44 | 7    | SARASWCFR        |
| DCP1B2                | gi 110152466 | 269   | 57.73  | 584.85   | 1167.68   | 1167.69   | -0.01 | 0    | 49.38 | 0.22    | 3    | VLPSIGNEVLK      |
| DCP1B2                | gi 112211770 | 326   | 212.34 | 610.80   | 1219.58   | 1219.59   | -0.02 | 0    | 28.03 | 47.51   | 1    | ASLENSLEETK      |
| DCP1B1                | gi 112211770 | 327   | 212.34 | 610.80   | 1219.59   | 1219.59   | -0.01 | 0    | 22.97 | 175.57  | 2    | ASLENSLEETK      |
| DCP1B2                | gi 112211770 | 431   | 212.34 | 681.34   | 1360.67   | 1360.68   | -0.01 | 0    | 50.20 | 0.34    | 1    | EVATNSELVQSGK    |
| DCP1B3                | gi 112211770 | 432   | 212.34 | 681.35   | 1360.68   | 1360.68   | -0.01 | 0    | 53.76 | 0.15    | 1    | EVATNSELVQSGK    |
| DCP1B1                | gi 112211770 | 433   | 212.34 | 681.35   | 1360.69   | 1360.68   | 0.00  | 0    | 55.26 | 0.11    | 1    | EVATNSELVQSGK    |
| DCP1B3                | gi 112211770 | 13    | 212.34 | 404.20   | 806.39    | 806.39    | 0.00  | 0    | 25.50 | 135.78  | 5    | LAADDFR          |
| DCP1B1                | gi 112211770 | 14    | 212.34 | 404.20   | 806.39    | 806.39    | 0.00  | 0    | 31.97 | 28.05   | 2    | LAADDFR          |
| DCP1B2                | gi 112211770 | 15    | 212.34 | 404.21   | 806.40    | 806.39    | 0.01  | 0    | 33.80 | 18.52   | 2    | LAADDFR          |
| DCP1B2                | gi 112211770 | 230   | 212.34 | 561.79   | 1121.56   | 1121.57   | -0.01 | 0    | 48.43 | 0.57    | 1    | LEQEIATYR        |
| DCP1B3                | gi 112211770 | 231   | 212.34 | 561.79   | 1121.56   | 1121.57   | -0.01 | 0    | 52.59 | 0.23    | 1    | LEQEIATYR        |
| DCP1B1                | gi 112211770 | 153   | 212.34 | 515.30   | 1028.58   | 1028.59   | 0.00  | 0    | 42.66 | 2.00    | 2    | VLDELTLAR        |
| DCP1B2                | gi 112211770 | 154   | 212.34 | 515.30   | 1028.59   | 1028.59   | 0.00  | 0    | 41.65 | 2.38    | 2    | VLDELTLAR        |
| DCP1B3                | gi 112215081 | 13    | 217.98 | 404.20   | 806.39    | 806.39    | 0.00  | 0    | 25.50 | 135.78  | 5    | LAADDFR          |
| DCP1B1                | gi 112215081 | 14    | 217.98 | 404.20   | 806.39    | 806.39    | 0.00  | 0    | 31.97 | 28.05   | 2    | LAADDFR          |
| DCP1B2                | gi 112215081 | 15    | 217.98 | 404.21   | 806.40    | 806.39    | 0.01  | 0    | 33.80 | 18.52   | 2    | LAADDFR          |
| DCP1B2                | gi 112215081 | 17    | 217.98 | 405.22   | 808.42    | 808.43    | -0.01 | 0    | 39.34 | 5.76    | 2    | LASYLDK          |
| DCP1B1                | gi 112215081 | 449   | 217.98 | 695.83   | 1389.65   | 1389.67   | -0.02 | 0    | 52.57 | 0.15    | 1    | QSLEASLAETGR     |
| DCP1B3                | gi 112215081 | 450   | 217.98 | 695.83   | 1389.66   | 1389.67   | -0.02 | 0    | 40.82 | 2.24    | 1    | QSLEASLAETGR     |
| DCP1B3                | gi 112215081 | 41    | 217.98 | 424.22   | 846.43    | 846.44    | -0.02 | 0    | 38.38 | 10.25   | 6    | SEITELR          |
| DCP1B3                | gi 112215081 | 155   | 217.98 | 516.30   | 1030.58   | 1030.59   | -0.01 | 0    | 47.39 | 0.77    | 1    | VLDELTLTK        |
| DCP1B2                | gi 112215081 | 156   | 217.98 | 516.30   | 1030.58   | 1030.59   | -0.01 | 0    | 29.62 | 37.96   | 1    | VLDELTLTK        |
| DCP1B1                | gi 112215081 | 157   | 217.98 | 516.30   | 1030.59   | 1030.59   | 0.00  | 0    | 53.89 | 0.11    | 1    | VLDELTLTK        |
| DCP1B2                | gi 112745190 | 219   | 221.42 | 554.27   | 1106.52   | 1106.54   | -0.02 | 0    | 47.65 | 0.57    | 1    | AQYEEIAQR        |
| DCP1B1                | gi 112745190 | 220   | 221.42 | 554.27   | 1106.54   | 1106.54   | 0.00  | 0    | 48.46 | 0.55    | 1    | AQYEEIAQR        |
| DCP1B1                | gi 112745190 | 244   | 221.42 | 571.26   | 1140.50   | 1140.51   | -0.01 | 0    | 27.05 | 33.94   | 1    | DYQELMNTK        |
| DCP1B2                | gi 112745190 | 114   | 221.42 | 487.26   | 972.51    | 972.52    | -0.02 | 0    | 60.68 | 0.05    | 1    | IEISELNR         |
| DCP1B3                | gi 112745190 | 115   | 221.42 | 487.26   | 972.51    | 972.52    | -0.02 | 0    | 45.11 | 1.58    | 2    | IEISELNR         |
| DCP1B1                | gi 112745190 | 510   | 221.42 | 508.60   | 1522.77   | 1522.78   | -0.01 | 1    | 17.07 | 751.78  | 1    | LLRDYQELMNTK     |
| DCP1B2                | gi 112745190 | 160   | 221.42 | 517.25   | 1032.49   | 1032.51   | -0.02 | 0    | 42.71 | 2.16    | 1    | TLLEGEESR        |
| DCP1B3                | gi 112745190 | 161   | 221.42 | 517.25   | 1032.49   | 1032.51   | -0.02 | 0    | 68.16 | 0.01    | 1    | TLLEGEESR        |
| DCP1B1                | gi 112745190 | 162   | 221.42 | 517.26   | 1032.50   | 1032.51   | -0.01 | 0    | 50.62 | 0.40    | 1    | TLLEGEESR        |
| DCP1B1                | gi 112745190 | 163   | 221.42 | 517.26   | 1032.50   | 1032.51   | -0.01 | 0    | 49.33 | 0.53    | 1    | TLLEGEESR        |
| DCP1B2                | gi 112749711 | 219   | 241.32 | 554.27   | 1106.52   | 1106.54   | -0.02 | 0    | 47.65 | 0.57    | 1    | AQYEEIAQR        |

Table S2. Contd.....

| SDS_PAGE<br>Zone Code | Accession    | Query | Score  | Observed | Mr (expt) | Mr (calc) | Delta | Miss | Score | Expect  | Rank | Peptide Sequence          |
|-----------------------|--------------|-------|--------|----------|-----------|-----------|-------|------|-------|---------|------|---------------------------|
| DCP1B1                | gi 112749711 | 220   | 241.32 | 554.27   | 1106.54   | 1106.54   | 0.00  | 0    | 48.46 | 0.55    | 1    | AQYEEIAQR                 |
| DCP1B1                | gi 112749711 | 484   | 241.32 | 738.39   | 1474.76   | 1474.78   | -0.02 | 0    | 77.38 | 0.00    | 1    | FLEQQNQVLQTK              |
| DCP1B3                | gi 112749711 | 485   | 241.32 | 738.40   | 1474.78   | 1474.78   | 0.00  | 0    | 27.99 | 48.59   | 3    | FLEQQNQVLQTK              |
| DCP1B2                | gi 112749711 | 486   | 241.32 | 738.40   | 1474.78   | 1474.78   | 0.00  | 0    | 72.05 | 0.00    | 1    | FLEQQNQVLQTK              |
| DCP1B2                | gi 112749711 | 114   | 241.32 | 487.26   | 972.51    | 972.52    | -0.02 | 0    | 60.68 | 0.05    | 1    | IEISELNR                  |
| DCP1B3                | gi 112749711 | 115   | 241.32 | 487.26   | 972.51    | 972.52    | -0.02 | 0    | 45.11 | 1.58    | 2    | IEISELNR                  |
| DCP1B2                | gi 112749711 | 448   | 241.32 | 692.34   | 1382.66   | 1382.68   | -0.02 | 0    | 54.80 | 0.09    | 1    | SLNMQFASFIDK              |
| DCP1B3                | gi 112758642 | 13    | 315.81 | 404.20   | 806.39    | 806.39    | 0.00  | 0    | 25.50 | 135.78  | 5    | LAADDFR                   |
| DCP1B1                | gi 112758642 | 14    | 315.81 | 404.20   | 806.39    | 806.39    | 0.00  | 0    | 31.97 | 28.05   | 2    | LAADDFR                   |
| DCP1B2                | gi 112758642 | 15    | 315.81 | 404.21   | 806.40    | 806.39    | 0.01  | 0    | 33.80 | 18.52   | 2    | LAADDFR                   |
| DCP1B3                | gi 112758642 | 265   | 315.81 | 583.29   | 1164.56   | 1164.58   | -0.02 | 0    | 58.60 | 0.05    | 1    | LENEIQTYR                 |
| DCP1B2                | gi 112758642 | 266   | 315.81 | 583.29   | 1164.56   | 1164.58   | -0.01 | 0    | 58.62 | 0.05    | 1    | LENEIQTYR                 |
| DCP1B1                | gi 112758642 | 267   | 315.81 | 583.30   | 1164.58   | 1164.58   | 0.00  | 0    | 60.25 | 0.04    | 1    | LENEIQTYR                 |
| DCP1B1                | gi 112758642 | 449   | 315.81 | 695.83   | 1389.65   | 1389.67   | -0.02 | 0    | 52.57 | 0.15    | 1    | QSLEASLAETGR              |
| DCP1B3                | gi 112758642 | 450   | 315.81 | 695.83   | 1389.66   | 1389.67   | -0.02 | 0    | 40.82 | 2.24    | 1    | QSLEASLAETGR              |
| DCP1B3                | gi 112758642 | 41    | 315.81 | 424.22   | 846.43    | 846.44    | -0.02 | 0    | 38.38 | 10.25   | 6    | SEITELR                   |
| DCP1B2                | gi 112758642 | 434   | 315.81 | 683.31   | 1364.61   | 1364.63   | -0.02 | 0    | 76.92 | 0.00    | 1    | SQYEQLAEQNR               |
| DCP1B1                | gi 112758642 | 435   | 315.81 | 683.32   | 1364.62   | 1364.63   | -0.01 | 0    | 65.35 | 0.01    | 1    | SQYEQLAEQNR               |
| DCP1B3                | gi 112758642 | 436   | 315.81 | 683.32   | 1364.63   | 1364.63   | 0.00  | 0    | 68.15 | 0.00    | 1    | SQYEQLAEQNR               |
| DCP1B3                | gi 112758642 | 155   | 315.81 | 516.30   | 1030.58   | 1030.59   | -0.01 | 0    | 47.39 | 0.77    | 1    | VLDELTLTK                 |
| DCP1B2                | gi 112758642 | 156   | 315.81 | 516.30   | 1030.58   | 1030.59   | -0.01 | 0    | 29.62 | 37.96   | 1    | VLDELTLTK                 |
| DCP1B1                | gi 112758642 | 157   | 315.81 | 516.30   | 1030.59   | 1030.59   | 0.00  | 0    | 53.89 | 0.11    | 1    | VLDELTLTK                 |
| DCP1B1                | gi 114214014 | 391   | 55.10  | 656.88   | 1311.74   | 1311.75   | -0.01 | 0    | 55.10 | 0.07    | 1    | VIQLETAAGAAIR             |
| DCP1B1                | gi 114723387 | 382   | 220.07 | 651.32   | 1300.63   | 1300.65   | -0.02 | 0    | 71.09 | 0.00    | 1    | ALEEANADLEVK              |
| DCP1B1                | gi 114723387 | 604   | 220.07 | 701.33   | 2100.98   | 2101.01   | -0.03 | 0    | 10.20 | 1254.03 | 3    | GQVGGDVNVEMDAA<br>LGVDLSR |
| DCP1B3                | gi 114723387 | 13    | 220.07 | 404.20   | 806.39    | 806.39    | 0.00  | 0    | 25.50 | 135.78  | 5    | LAADDFR                   |
| DCP1B1                | gi 114723387 | 14    | 220.07 | 404.20   | 806.39    | 806.39    | 0.00  | 0    | 31.97 | 28.05   | 2    | LAADDFR                   |
| DCP1B2                | gi 114723387 | 15    | 220.07 | 404.21   | 806.40    | 806.39    | 0.01  | 0    | 33.80 | 18.52   | 2    | LAADDFR                   |
| DCP1B2                | gi 114723387 | 17    | 220.07 | 405.22   | 808.42    | 808.43    | -0.01 | 0    | 39.34 | 5.76    | 2    | LASYLDK                   |
| DCP1B1                | gi 114723387 | 153   | 220.07 | 515.30   | 1028.58   | 1028.59   | 0.00  | 0    | 42.66 | 2.00    | 2    | VLDELTLAR                 |
| DCP1B2                | gi 114723387 | 154   | 220.07 | 515.30   | 1028.59   | 1028.59   | 0.00  | 0    | 41.65 | 2.38    | 2    | VLDELTLAR                 |
| DCP1B2                | gi 114723387 | 210   | 220.07 | 545.76   | 1089.50   | 1089.52   | -0.02 | 0    | 22.98 | 156.65  | 2    | VTMQNLNDR                 |
| DCP1B2                | gi 114727069 | 211   | 124.00 | 547.26   | 1092.51   | 1092.52   | -0.01 | 0    | 57.13 | 0.07    | 1    | AQYEEIANR                 |
| DCP1B3                | gi 114727069 | 264   | 124.00 | 583.29   | 1164.56   | 1164.58   | -0.02 | 0    | 67.64 | 0.01    | 1    | YEELQVTAGR                |
| DCP1B1                | gi 114727069 | 268   | 124.00 | 583.30   | 1164.58   | 1164.58   | 0.00  | 0    | 58.41 | 0.06    | 1    | YEELQVTAGR                |

Table S2. Contd.....

| SDS_PAGE<br>Zone Code | Accession    | Query | Score  | Observed | Mr (expt) | Mr (calc) | Delta | Miss | Score | Expect  | Rank | Peptide Sequence            |
|-----------------------|--------------|-------|--------|----------|-----------|-----------|-------|------|-------|---------|------|-----------------------------|
| DCP1B3                | gi 114747959 | 13    | 140.28 | 404.20   | 806.39    | 806.39    | 0.00  | 0    | 25.50 | 135.78  | 5    | LAADDFR                     |
| DCP1B1                | gi 114747959 | 14    | 140.28 | 404.20   | 806.39    | 806.39    | 0.00  | 0    | 31.97 | 28.05   | 2    | LAADDFR                     |
| DCP1B2                | gi 114747959 | 15    | 140.28 | 404.21   | 806.40    | 806.39    | 0.01  | 0    | 33.80 | 18.52   | 2    | LAADDFR                     |
| DCP1B2                | gi 114747959 | 230   | 140.28 | 561.79   | 1121.56   | 1121.57   | -0.01 | 0    | 48.43 | 0.57    | 1    | LEQEIATYR                   |
| DCP1B3                | gi 114747959 | 231   | 140.28 | 561.79   | 1121.56   | 1121.57   | -0.01 | 0    | 52.59 | 0.23    | 1    | LEQEIATYR                   |
| DCP1B3                | gi 114747959 | 155   | 140.28 | 516.30   | 1030.58   | 1030.59   | -0.01 | 0    | 47.39 | 0.77    | 1    | VLDELTLTK                   |
| DCP1B2                | gi 114747959 | 156   | 140.28 | 516.30   | 1030.58   | 1030.59   | -0.01 | 0    | 29.62 | 37.96   | 1    | VLDELTLTK                   |
| DCP1B1                | gi 114747959 | 157   | 140.28 | 516.30   | 1030.59   | 1030.59   | 0.00  | 0    | 53.89 | 0.11    | 1    | VLDELTLTK                   |
| DCP1B1                | gi 117909285 | 137   | 100.44 | 503.75   | 1005.49   | 1005.51   | -0.02 | 0    | 38.78 | 6.14    | 1    | GPLYSDIGK                   |
| DCP1B1                | gi 117909285 | 524   | 100.44 | 521.29   | 1560.83   | 1560.85   | -0.02 | 1    | 61.66 | 0.02    | 1    | KGELFVADVNTQLK              |
| DCP1B2                | gi 119005052 | 202   | 101.85 | 539.79   | 1077.56   | 1077.57   | -0.01 | 0    | 48.39 | 0.65    | 1    | AENLDYLIK                   |
| DCP1B1                | gi 119005052 | 339   | 101.85 | 619.31   | 1236.60   | 1236.60   | 0.00  | 0    | 38.58 | 4.74    | 1    | SLGADEVLDYR                 |
| DCP1B2                | gi 119005052 | 340   | 101.85 | 619.31   | 1236.60   | 1236.60   | 0.00  | 0    | 53.46 | 0.16    | 1    | SLGADEVLDYR                 |
| DCP1B2                | gi 13264707  | 49    | 55.72  | 428.76   | 855.51    | 855.52    | -0.01 | 0    | 55.72 | 0.08    | 2    | LATVLSPR                    |
| DCP1B2                | gi 14489238  | 50    | 131.71 | 429.73   | 857.45    | 857.46    | -0.01 | 0    | 61.40 | 0.04    | 6    | LLEVDNR                     |
| DCP1B2                | gi 14489238  | 286   | 131.71 | 592.35   | 1182.69   | 1182.71   | -0.02 | 0    | 70.31 | 0.00    | 1    | LNQISILVQR                  |
| DCP1B2                | gi 14924599  | 206   | 126.64 | 541.79   | 1081.57   | 1081.59   | -0.02 | 1    | 9.69  | 4073.04 | 8    | FASFDKVR                    |
| DCP1B1                | gi 14924599  | 484   | 126.64 | 738.39   | 1474.76   | 1474.78   | -0.02 | 0    | 77.38 | 0.00    | 1    | FLEQQNQLQTK                 |
| DCP1B3                | gi 14924599  | 485   | 126.64 | 738.40   | 1474.78   | 1474.78   | 0.00  | 0    | 27.99 | 48.59   | 3    | FLEQQNQLQTK                 |
| DCP1B2                | gi 14924599  | 486   | 126.64 | 738.40   | 1474.78   | 1474.78   | 0.00  | 0    | 72.05 | 0.00    | 1    | FLEQQNQLQTK                 |
| DCP1B1                | gi 14924599  | 644   | 126.64 | 978.16   | 2931.45   | 2931.51   | -0.06 | 1    | 40.34 | 0.78    | 1    | FLEQQNQLQTKWE<br>LLQQVDTSTR |
| DCP1B1                | gi 15768669  | 224   | 63.70  | 556.29   | 1110.56   | 1110.57   | -0.01 | 0    | 63.70 | 0.02    | 3    | LSISTSNSFR                  |
| DCP1B2                | gi 17312739  | 397   | 67.90  | 659.82   | 1317.63   | 1317.65   | -0.02 | 0    | 67.90 | 0.01    | 2    | SQLNSLQEASGGK               |
| DCP1B3                | gi 17312739  | 398   | 67.90  | 659.84   | 1317.66   | 1317.65   | 0.00  | 0    | 63.98 | 0.01    | 2    | SQLNSLQEASGGK               |
| DCP1B1                | gi 21393323  | 224   | 63.70  | 556.29   | 1110.56   | 1110.57   | -0.01 | 0    | 63.70 | 0.02    | 2    | LSISTSFSNR                  |
| DCP1B2                | gi 21872084  | 206   | 88.41  | 541.79   | 1081.57   | 1081.59   | -0.02 | 1    | 9.69  | 4073.04 | 8    | FASFDKVR                    |
| DCP1B2                | gi 21872084  | 114   | 88.41  | 487.26   | 972.51    | 972.52    | -0.02 | 0    | 60.68 | 0.05    | 2    | LEISELNR                    |
| DCP1B3                | gi 21872084  | 115   | 88.41  | 487.26   | 972.51    | 972.52    | -0.02 | 0    | 45.11 | 1.58    | 3    | LEISELNR                    |
| DCP1B1                | gi 21872084  | 247   | 88.41  | 576.78   | 1151.54   | 1151.55   | -0.01 | 1    | 18.04 | 454.55  | 4    | NKYEDEINK                   |
| DCP1B1                | gi 21889803  | 26    | 167.97 | 421.26   | 840.50    | 840.51    | -0.01 | 1    | 25.22 | 78.84   | 3    | ADIPGLKK                    |
| DCP1B1                | gi 21889803  | 140   | 167.97 | 505.75   | 1009.48   | 1009.48   | 0.00  | 0    | 37.19 | 6.61    | 1    | ENSAFVSTR                   |
| DCP1B1                | gi 21889803  | 192   | 167.97 | 537.26   | 1072.50   | 1072.52   | -0.02 | 0    | 17.91 | 433.33  | 1    | ETPESHVFK                   |
| DCP1B1                | gi 21889803  | 117   | 167.97 | 487.77   | 973.53    | 973.53    | 0.00  | 1    | 35.74 | 13.59   | 2    | FRLPENAK                    |
| DCP1B2                | gi 21889803  | 74    | 167.97 | 451.25   | 900.49    | 900.50    | -0.02 | 0    | 51.91 | 0.39    | 5    | VLQISGER                    |
| DCP1B3                | gi 21889803  | 75    | 167.97 | 451.25   | 900.49    | 900.50    | -0.01 | 0    | 51.07 | 0.46    | 5    | VLQISGER                    |

Table S2. Contd.....

| SDS_PAGE<br>Zone Code | Accession   | Query | Score  | Observed | Mr (expt) | Mr (calc) | Delta | Miss | Score  | Expect  | Rank | Peptide Sequence  |
|-----------------------|-------------|-------|--------|----------|-----------|-----------|-------|------|--------|---------|------|-------------------|
| DCP1B1                | gi 21889803 | 76    | 167.97 | 451.26   | 900.50    | 900.50    | -0.01 | 0    | 45.86  | 1.51    | 5    | VLQISGER          |
| DCP1B1                | gi 21889803 | 77    | 167.97 | 451.26   | 900.51    | 900.50    | 0.00  | 0    | 51.27  | 0.41    | 5    | VLQISGER          |
| DCP1B2                | gi 23844925 | 195   | 60.87  | 537.29   | 1072.57   | 1072.57   | 0.00  | 0    | 37.89  | 7.87    | 7    | LMLQIDNAR         |
| DCP1B2                | gi 23844925 | 210   | 60.87  | 545.76   | 1089.50   | 1089.52   | -0.02 | 0    | 22.98  | 156.65  | 2    | VTMQNLNDR         |
| DCP1B1                | gi 24018741 | 26    | 131.74 | 421.26   | 840.50    | 840.51    | -0.01 | 1    | 25.22  | 78.84   | 4    | ADLPGIKK          |
| DCP1B1                | gi 24018741 | 567   | 131.74 | 586.64   | 1756.89   | 1756.90   | 0.00  | 1    | 54.61  | 0.09    | 1    | VEIEDDRVVLQISGER  |
| DCP1B2                | gi 24018741 | 74    | 131.74 | 451.25   | 900.49    | 900.50    | -0.02 | 0    | 51.91  | 0.39    | 5    | VLQISGER          |
| DCP1B3                | gi 24018741 | 75    | 131.74 | 451.25   | 900.49    | 900.50    | -0.01 | 0    | 51.07  | 0.46    | 5    | VLQISGER          |
| DCP1B1                | gi 24018741 | 76    | 131.74 | 451.26   | 900.50    | 900.50    | -0.01 | 0    | 45.86  | 1.51    | 5    | VLQISGER          |
| DCP1B1                | gi 24018741 | 77    | 131.74 | 451.26   | 900.51    | 900.50    | 0.00  | 0    | 51.27  | 0.41    | 5    | VLQISGER          |
| DCP1B1                | gi 24060606 | 599   | 140.60 | 665.01   | 1992.00   | 1992.02   | -0.02 | 1    | 140.60 | 0.00    | 1    | QIVSSTNEEDKVVIFER |
| DCP1B2                | gi 25038991 | 59    | 64.88  | 436.25   | 870.48    | 870.49    | -0.01 | 0    | 37.74  | 7.59    | 2    | QAIVDGLR          |
| DCP1B2                | gi 25038991 | 460   | 64.88  | 470.25   | 1407.73   | 1407.76   | -0.03 | 0    | 6.86   | 6966.62 | 4    | SSAVFLPHGPAAVR    |
| DCP1B2                | gi 25038991 | 461   | 64.88  | 704.88   | 1407.75   | 1407.76   | -0.02 | 0    | 27.14  | 61.36   | 1    | SSAVFLPHGPAAVR    |
| DCP1B2                | gi 25316734 | 114   | 60.68  | 487.26   | 972.51    | 972.52    | -0.02 | 0    | 60.68  | 0.05    | 4    | LELSELNR          |
| DCP1B3                | gi 25316734 | 115   | 60.68  | 487.26   | 972.51    | 972.52    | -0.02 | 0    | 45.11  | 1.58    | 5    | LELSELNR          |
| DCP1B2                | gi 25510704 | 230   | 90.97  | 561.79   | 1121.56   | 1121.57   | -0.01 | 0    | 48.43  | 0.57    | 1    | LEQEIATYR         |
| DCP1B3                | gi 25510704 | 231   | 90.97  | 561.79   | 1121.56   | 1121.57   | -0.01 | 0    | 52.59  | 0.23    | 1    | LEQEIATYR         |
| DCP1B3                | gi 25510704 | 41    | 90.97  | 424.22   | 846.43    | 846.44    | -0.02 | 0    | 38.38  | 10.25   | 6    | SEITELR           |
| DCP1B1                | gi 27420318 | 117   | 76.36  | 487.77   | 973.53    | 973.53    | 0.00  | 1    | 35.74  | 13.59   | 2    | FRLPENAK          |
| DCP1B1                | gi 27420318 | 567   | 76.36  | 586.64   | 1756.89   | 1756.90   | 0.00  | 1    | 40.62  | 2.14    | 2    | VEIEDDSVLQIRGER   |
| DCP1B1                | gi 27420379 | 26    | 95.32  | 421.26   | 840.50    | 840.51    | -0.01 | 1    | 25.22  | 78.84   | 5    | ADLPLGKK          |
| DCP1B1                | gi 27420379 | 487   | 95.32  | 739.39   | 1476.76   | 1476.73   | 0.02  | 0    | 18.19  | 483.04  | 3    | ASMENGVLTMTVPK    |
| DCP1B2                | gi 27420379 | 74    | 95.32  | 451.25   | 900.49    | 900.50    | -0.02 | 0    | 51.91  | 0.39    | 5    | VLQISGER          |
| DCP1B3                | gi 27420379 | 75    | 95.32  | 451.25   | 900.49    | 900.50    | -0.01 | 0    | 51.07  | 0.46    | 5    | VLQISGER          |
| DCP1B1                | gi 27420379 | 76    | 95.32  | 451.26   | 900.50    | 900.50    | -0.01 | 0    | 45.86  | 1.51    | 5    | VLQISGER          |
| DCP1B1                | gi 27420379 | 77    | 95.32  | 451.26   | 900.51    | 900.50    | 0.00  | 0    | 51.27  | 0.41    | 5    | VLQISGER          |
| DCP1B3                | gi 28465823 | 371   | 97.03  | 639.35   | 1276.68   | 1276.70   | -0.02 | 0    | 33.15  | 17.29   | 2    | LALDIEIATYR       |
| DCP1B1                | gi 28465823 | 247   | 97.03  | 576.78   | 1151.54   | 1151.55   | -0.01 | 1    | 18.04  | 454.55  | 4    | NKYEDEINK         |
| DCP1B2                | gi 28465823 | 107   | 97.03  | 486.75   | 971.49    | 971.50    | -0.01 | 0    | 36.89  | 8.99    | 2    | QEIAELNR          |
| DCP1B3                | gi 28465823 | 108   | 97.03  | 486.75   | 971.49    | 971.50    | -0.01 | 0    | 45.84  | 1.11    | 1    | QEIAELNR          |
| DCP1B1                | gi 286630   | 391   | 55.10  | 656.88   | 1311.74   | 1311.75   | -0.01 | 0    | 55.10  | 0.07    | 2    | VLQLETAAGAAIR     |
| DCP1B2                | gi 28911438 | 262   | 112.84 | 581.77   | 1161.53   | 1161.54   | -0.01 | 0    | 63.87  | 0.01    | 1    | DAVYTEHAR         |
| DCP1B1                | gi 28911438 | 263   | 112.84 | 581.78   | 1161.54   | 1161.54   | 0.00  | 0    | 37.47  | 5.53    | 1    | DAVYTEHAR         |
| DCP1B1                | gi 28911438 | 283   | 112.84 | 590.81   | 1179.60   | 1179.61   | -0.01 | 0    | 48.97  | 0.53    | 1    | ISGIYEETR         |

Table S2. Contd.....

| SDS_PAGE<br>Zone Code | Accession   | Query | Score  | Observed | Mr (expt) | Mr (calc) | Delta | Miss | Score | Expect  | Rank | Peptide Sequence |
|-----------------------|-------------|-------|--------|----------|-----------|-----------|-------|------|-------|---------|------|------------------|
| DCP1B2                | gi 2922036  | 317   | 63.10  | 604.30   | 1206.58   | 1206.59   | -0.01 | 0    | 63.10 | 0.02    | 1    | VLAPYSSSEDAR     |
| DCP1B1                | gi 29432310 | 282   | 63.67  | 590.29   | 1178.57   | 1178.59   | -0.02 | 0    | 63.67 | 0.02    | 1    | YEELQITAGR       |
| DCP1B1                | gi 29532161 | 224   | 63.70  | 556.29   | 1110.56   | 1110.57   | -0.01 | 0    | 63.70 | 0.02    | 1    | ISISTSGGSFR      |
| DCP1B2                | gi 29532386 | 349   | 77.11  | 627.80   | 1253.58   | 1253.60   | -0.02 | 0    | 77.11 | 0.00    | 1    | GFSSGS AVVSGGSR  |
| DCP1B1                | gi 29532386 | 350   | 77.11  | 627.80   | 1253.60   | 1253.60   | 0.00  | 0    | 37.10 | 5.78    | 1    | GFSSGS AVVSGGSR  |
| DCP1B3                | gi 29532386 | 351   | 77.11  | 627.81   | 1253.60   | 1253.60   | 0.00  | 0    | 4.88  | 9249.04 | 9    | GFSSGS AVVSGGSR  |
| DCP1B1                | gi 29532489 | 484   | 176.23 | 738.39   | 1474.76   | 1474.78   | -0.02 | 0    | 77.38 | 0.00    | 1    | FLEQQNQVLQTK     |
| DCP1B3                | gi 29532489 | 485   | 176.23 | 738.40   | 1474.78   | 1474.78   | 0.00  | 0    | 27.99 | 48.59   | 3    | FLEQQNQVLQTK     |
| DCP1B2                | gi 29532489 | 486   | 176.23 | 738.40   | 1474.78   | 1474.78   | 0.00  | 0    | 72.05 | 0.00    | 1    | FLEQQNQVLQTK     |
| DCP1B2                | gi 29532489 | 448   | 176.23 | 692.34   | 1382.66   | 1382.68   | -0.02 | 0    | 54.80 | 0.09    | 1    | SLNNQFASFIDK     |
| DCP1B1                | gi 29532489 | 62    | 176.23 | 437.75   | 873.48    | 873.49    | -0.01 | 0    | 44.05 | 2.43    | 1    | SLVNLGGSK        |
| DCP1B2                | gi 30161665 | 119   | 77.36  | 488.28   | 974.54    | 974.55    | -0.01 | 0    | 38.73 | 5.60    | 1    | IGLFGGAGVGK      |
| DCP1B2                | gi 30161665 | 437   | 77.36  | 684.38   | 1366.75   | 1366.75   | 0.01  | 0    | 38.63 | 3.33    | 3    | ILNVIGEPIDER     |
| DCP1B1                | gi 31015481 | 189   | 81.88  | 533.26   | 1064.51   | 1064.51   | -0.01 | 0    | 42.54 | 2.09    | 1    | AQYEDLAQK        |
| DCP1B2                | gi 31015481 | 17    | 81.88  | 405.22   | 808.42    | 808.43    | -0.01 | 0    | 39.34 | 5.76    | 2    | LASYLDK          |
| DCP1B3                | gi 31423267 | 13    | 62.11  | 404.20   | 806.39    | 806.39    | 0.00  | 0    | 25.50 | 135.78  | 5    | LAADDFR          |
| DCP1B1                | gi 31423267 | 14    | 62.11  | 404.20   | 806.39    | 806.39    | 0.00  | 0    | 31.97 | 28.05   | 2    | LAADDFR          |
| DCP1B2                | gi 31423267 | 15    | 62.11  | 404.21   | 806.40    | 806.39    | 0.01  | 0    | 33.80 | 18.52   | 2    | LAADDFR          |
| DCP1B2                | gi 31423267 | 156   | 62.11  | 516.30   | 1030.58   | 1030.57   | 0.02  | 0    | 28.31 | 51.33   | 2    | VLDELTVSR        |
| DCP1B2                | gi 31429724 | 286   | 70.31  | 592.35   | 1182.69   | 1182.71   | -0.02 | 0    | 70.31 | 0.00    | 3    | NIQLSLINR        |
| DCP1B1                | gi 31661492 | 451   | 94.90  | 696.34   | 1390.66   | 1390.66   | -0.01 | 0    | 32.95 | 14.58   | 1    | FPQPYANEQAAR     |
| DCP1B1                | gi 31661492 | 583   | 94.90  | 621.64   | 1861.89   | 1861.91   | -0.02 | 1    | 61.95 | 0.01    | 1    | ISDRFPQPYANEQAAR |
| DCP1B1                | gi 3248492  | 360   | 83.61  | 633.31   | 1264.61   | 1264.63   | -0.02 | 0    | 67.08 | 0.01    | 1    | TNAENEFVTIK      |
| DCP1B2                | gi 3248492  | 361   | 83.61  | 633.31   | 1264.62   | 1264.63   | -0.01 | 0    | 64.61 | 0.01    | 1    | TNAENEFVTIK      |
| DCP1B3                | gi 3248492  | 453   | 83.61  | 465.24   | 1392.70   | 1392.72   | -0.02 | 1    | 16.53 | 751.07  | 1    | TNAENEFVIKK      |
| DCP1B2                | gi 3248492  | 454   | 83.61  | 465.24   | 1392.70   | 1392.72   | -0.02 | 1    | 15.46 | 954.21  | 3    | TNAENEFVIKK      |
| DCP1B1                | gi 32536407 | 137   | 79.88  | 503.75   | 1005.49   | 1005.51   | -0.02 | 0    | 38.78 | 6.14    | 1    | GPGLYSDIGK       |
| DCP1B1                | gi 32536407 | 524   | 79.88  | 521.29   | 1560.83   | 1560.85   | -0.02 | 1    | 41.10 | 1.99    | 3    | KGEVFLADVNTQLK   |
| DCP1B2                | gi 33164780 | 211   | 84.86  | 547.26   | 1092.51   | 1092.52   | -0.01 | 0    | 57.13 | 0.07    | 1    | AQYEEIANR        |
| DCP1B2                | gi 33164780 | 206   | 84.86  | 541.79   | 1081.57   | 1081.59   | -0.02 | 1    | 9.69  | 4073.04 | 8    | FASFIDKVR        |
| DCP1B1                | gi 33164780 | 247   | 84.86  | 576.78   | 1151.54   | 1151.55   | -0.01 | 1    | 18.04 | 454.55  | 4    | NKYEDEINK        |
| DCP1B2                | gi 3326750  | 50    | 61.40  | 429.73   | 857.45    | 857.46    | -0.01 | 0    | 61.40 | 0.04    | 1    | IEVDNR           |
| DCP1B2                | gi 33405959 | 397   | 67.90  | 659.82   | 1317.63   | 1317.65   | -0.02 | 0    | 67.90 | 0.01    | 1    | SQLNSIQEASGGK    |
| DCP1B3                | gi 33405959 | 398   | 67.90  | 659.84   | 1317.66   | 1317.65   | 0.00  | 0    | 63.98 | 0.01    | 1    | SQLNSIQEASGGK    |
| DCP1B2                | gi 33627058 | 114   | 56.56  | 487.26   | 972.51    | 972.52    | -0.02 | 0    | 56.56 | 0.12    | 5    | IEISEVAGR        |

Table S2. Contd.....

| SDS_PAGE<br>Zone Code | Accession   | Query | Score  | Observed | Mr (expt) | Mr (calc) | Delta | Miss | Score | Expect  | Rank | Peptide Sequence |
|-----------------------|-------------|-------|--------|----------|-----------|-----------|-------|------|-------|---------|------|------------------|
| DCP1B3                | gi 33627058 | 115   | 56.56  | 487.26   | 972.51    | 972.52    | -0.02 | 0    | 46.40 | 1.17    | 1    | IEISEVAGR        |
| DCP1B2                | gi 37711813 | 219   | 135.53 | 554.27   | 1106.52   | 1106.54   | -0.02 | 0    | 47.65 | 0.57    | 1    | AQYEEIAQR        |
| DCP1B1                | gi 37711813 | 220   | 135.53 | 554.27   | 1106.54   | 1106.54   | 0.00  | 0    | 48.46 | 0.55    | 1    | AQYEEIAQR        |
| DCP1B2                | gi 37711813 | 206   | 135.53 | 541.79   | 1081.57   | 1081.59   | -0.02 | 1    | 9.69  | 4073.04 | 8    | FASFIDKVR        |
| DCP1B1                | gi 37711813 | 484   | 135.53 | 738.39   | 1474.76   | 1474.78   | -0.02 | 0    | 77.38 | 0.00    | 1    | FLEQQNQVLQTK     |
| DCP1B3                | gi 37711813 | 485   | 135.53 | 738.40   | 1474.78   | 1474.78   | 0.00  | 0    | 27.99 | 48.59   | 3    | FLEQQNQVLQTK     |
| DCP1B2                | gi 37711813 | 486   | 135.53 | 738.40   | 1474.78   | 1474.78   | 0.00  | 0    | 72.05 | 0.00    | 1    | FLEQQNQVLQTK     |
| DCP1B2                | gi 3854018  | 91    | 75.40  | 466.73   | 931.44    | 931.45    | -0.01 | 0    | 37.66 | 7.15    | 1    | AVEDELEK         |
| DCP1B2                | gi 3854018  | 59    | 75.40  | 436.25   | 870.48    | 870.49    | -0.01 | 0    | 37.74 | 7.59    | 2    | QAIVDGLR         |
| DCP1B2                | gi 40324499 | 50    | 61.40  | 429.73   | 857.45    | 857.46    | -0.01 | 0    | 61.40 | 0.04    | 3    | LIEVDNR          |
| DCP1B3                | gi 45838141 | 371   | 78.38  | 639.35   | 1276.68   | 1276.70   | -0.02 | 0    | 33.15 | 17.29   | 4    | LALDLEIATYR      |
| DCP1B3                | gi 45838141 | 194   | 78.38  | 537.29   | 1072.57   | 1072.59   | -0.02 | 1    | 34.22 | 18.49   | 1    | LRSEIDNVK        |
| DCP1B2                | gi 45838141 | 195   | 78.38  | 537.29   | 1072.57   | 1072.59   | -0.02 | 1    | 45.23 | 1.45    | 4    | LRSEIDNVK        |
| DCP1B2                | gi 45844527 | 206   | 105.11 | 541.79   | 1081.57   | 1081.59   | -0.02 | 1    | 9.69  | 4073.04 | 8    | FASFIDKVR        |
| DCP1B1                | gi 45844527 | 484   | 105.11 | 738.39   | 1474.76   | 1474.78   | -0.02 | 0    | 77.38 | 0.00    | 1    | FLEQQNQVLQTK     |
| DCP1B3                | gi 45844527 | 485   | 105.11 | 738.40   | 1474.78   | 1474.78   | 0.00  | 0    | 27.99 | 48.59   | 3    | FLEQQNQVLQTK     |
| DCP1B2                | gi 45844527 | 486   | 105.11 | 738.40   | 1474.78   | 1474.78   | 0.00  | 0    | 72.05 | 0.00    | 1    | FLEQQNQVLQTK     |
| DCP1B1                | gi 45844527 | 247   | 105.11 | 576.78   | 1151.54   | 1151.55   | -0.01 | 1    | 18.04 | 454.55  | 4    | NKYEDEINK        |
| DCP1B2                | gi 46213387 | 260   | 57.19  | 580.78   | 1159.54   | 1159.56   | -0.02 | 0    | 57.19 | 0.05    | 2    | EEDTTVPLEK       |
| DCP1B3                | gi 46213387 | 261   | 57.19  | 580.78   | 1159.55   | 1159.56   | -0.01 | 0    | 20.53 | 285.93  | 2    | EEDTTVPLEK       |
| DCP1B2                | gi 46419503 | 219   | 81.61  | 554.27   | 1106.52   | 1106.54   | -0.02 | 0    | 47.65 | 0.57    | 1    | AQYEEIAQR        |
| DCP1B1                | gi 46419503 | 220   | 81.61  | 554.27   | 1106.54   | 1106.54   | 0.00  | 0    | 48.46 | 0.55    | 1    | AQYEEIAQR        |
| DCP1B3                | gi 46419503 | 371   | 81.61  | 639.35   | 1276.68   | 1276.70   | -0.02 | 0    | 33.15 | 17.29   | 2    | LALDIEIATYR      |
| DCP1B2                | gi 47832505 | 320   | 61.51  | 605.31   | 1208.60   | 1208.61   | -0.02 | 0    | 61.51 | 0.03    | 1    | LQQLNPDP         |
| DCP1B1                | gi 48485734 | 26    | 112.87 | 421.26   | 840.50    | 840.51    | -0.01 | 1    | 25.22 | 78.84   | 4    | ADLPGIKK         |
| DCP1B1                | gi 48485734 | 117   | 112.87 | 487.77   | 973.53    | 973.53    | 0.00  | 1    | 35.74 | 13.59   | 2    | FRLPENAK         |
| DCP1B2                | gi 48485734 | 74    | 112.87 | 451.25   | 900.49    | 900.50    | -0.02 | 0    | 51.91 | 0.39    | 5    | VLQISGER         |
| DCP1B3                | gi 48485734 | 75    | 112.87 | 451.25   | 900.49    | 900.50    | -0.01 | 0    | 51.07 | 0.46    | 5    | VLQISGER         |
| DCP1B1                | gi 48485734 | 76    | 112.87 | 451.26   | 900.50    | 900.50    | -0.01 | 0    | 45.86 | 1.51    | 5    | VLQISGER         |
| DCP1B1                | gi 48485734 | 77    | 112.87 | 451.26   | 900.51    | 900.50    | 0.00  | 0    | 51.27 | 0.41    | 5    | VLQISGER         |
| DCP1B1                | gi 49014261 | 26    | 134.50 | 421.26   | 840.50    | 840.51    | -0.01 | 1    | 25.22 | 78.84   | 5    | ADLPGLKK         |
| DCP1B1                | gi 49014261 | 117   | 134.50 | 487.77   | 973.53    | 973.53    | 0.00  | 1    | 35.74 | 13.59   | 2    | FRLPENAK         |
| DCP1B1                | gi 49014261 | 567   | 134.50 | 586.64   | 1756.89   | 1756.90   | 0.00  | 1    | 21.63 | 169.81  | 6    | IEVEDDRVLQISGER  |
| DCP1B2                | gi 49014261 | 74    | 134.50 | 451.25   | 900.49    | 900.50    | -0.02 | 0    | 51.91 | 0.39    | 5    | VLQISGER         |
| DCP1B3                | gi 49014261 | 75    | 134.50 | 451.25   | 900.49    | 900.50    | -0.01 | 0    | 51.07 | 0.46    | 5    | VLQISGER         |
| DCP1B1                | gi 49014261 | 76    | 134.50 | 451.26   | 900.50    | 900.50    | -0.01 | 0    | 45.86 | 1.51    | 5    | VLQISGER         |

Table S2. Contd.....

| SDS_PAGE<br>Zone Code | Accession   | Query | Score  | Observed | Mr (expt) | Mr (calc) | Delta | Miss | Score  | Expect  | Rank | Peptide Sequence |
|-----------------------|-------------|-------|--------|----------|-----------|-----------|-------|------|--------|---------|------|------------------|
| DCP1B1                | gi 49014261 | 77    | 134.50 | 451.26   | 900.51    | 900.50    | 0.00  | 0    | 51.27  | 0.41    | 5    | VLQISGER         |
| DCP1B3                | gi 50366872 | 13    | 111.04 | 404.20   | 806.39    | 806.39    | 0.00  | 0    | 25.50  | 135.78  | 5    | LAADDFR          |
| DCP1B1                | gi 50366872 | 14    | 111.04 | 404.20   | 806.39    | 806.39    | 0.00  | 0    | 31.97  | 28.05   | 2    | LAADDFR          |
| DCP1B2                | gi 50366872 | 15    | 111.04 | 404.21   | 806.40    | 806.39    | 0.01  | 0    | 33.80  | 18.52   | 2    | LAADDFR          |
| DCP1B2                | gi 50366872 | 210   | 111.04 | 545.76   | 1089.50   | 1089.52   | -0.02 | 0    | 22.98  | 156.65  | 2    | VTMQLNDR         |
| DCP1B3                | gi 50366872 | 128   | 111.04 | 497.25   | 992.48    | 992.49    | -0.02 | 0    | 40.19  | 3.96    | 1    | YENEVALR         |
| DCP1B2                | gi 50366872 | 129   | 111.04 | 497.25   | 992.48    | 992.49    | -0.01 | 0    | 54.26  | 0.16    | 1    | YENEVALR         |
| DCP1B1                | gi 50366872 | 130   | 111.04 | 497.25   | 992.49    | 992.49    | -0.01 | 0    | 51.04  | 0.35    | 1    | YENEVALR         |
| DCP1B2                | gi 5042680  | 119   | 149.09 | 488.28   | 974.54    | 974.55    | -0.01 | 0    | 38.73  | 5.60    | 1    | IGLFGGAGVGK      |
| DCP1B2                | gi 5042680  | 437   | 149.09 | 684.38   | 1366.75   | 1366.75   | 0.01  | 0    | 38.63  | 3.33    | 1    | IINVIGEPIDER     |
| DCP1B2                | gi 5042680  | 462   | 149.09 | 705.41   | 1408.80   | 1408.80   | 0.00  | 0    | 49.56  | 0.17    | 1    | VLNTGSPITVPVGR   |
| DCP1B2                | gi 5042680  | 277   | 149.09 | 587.33   | 1172.64   | 1172.66   | -0.02 | 0    | 22.17  | 223.60  | 1    | VVDLLAPYQR       |
| DCP1B2                | gi 50458206 | 49    | 55.72  | 428.76   | 855.51    | 855.52    | -0.01 | 0    | 55.72  | 0.08    | 1    | IATVISPR         |
| DCP1B3                | gi 50463831 | 13    | 114.84 | 404.20   | 806.39    | 806.39    | 0.00  | 0    | 25.50  | 135.78  | 5    | LAADDFR          |
| DCP1B1                | gi 50463831 | 14    | 114.84 | 404.20   | 806.39    | 806.39    | 0.00  | 0    | 31.97  | 28.05   | 2    | LAADDFR          |
| DCP1B2                | gi 50463831 | 15    | 114.84 | 404.21   | 806.40    | 806.39    | 0.01  | 0    | 33.80  | 18.52   | 2    | LAADDFR          |
| DCP1B3                | gi 50463831 | 41    | 114.84 | 424.22   | 846.43    | 846.44    | -0.02 | 0    | 38.38  | 10.25   | 6    | SEITELR          |
| DCP1B1                | gi 50463831 | 153   | 114.84 | 515.30   | 1028.58   | 1028.59   | 0.00  | 0    | 42.66  | 2.00    | 2    | VLDELTLAR        |
| DCP1B2                | gi 50463831 | 154   | 114.84 | 515.30   | 1028.59   | 1028.59   | 0.00  | 0    | 41.65  | 2.38    | 2    | VLDELTLAR        |
| DCP1B2                | gi 51672597 | 286   | 70.31  | 592.35   | 1182.69   | 1182.71   | -0.02 | 0    | 70.31  | 0.00    | 2    | LNQLSILLNR       |
| DCP1B1                | gi 52582373 | 478   | 115.10 | 731.38   | 1460.75   | 1460.75   | 0.00  | 0    | 81.43  | 0.00    | 1    | SSMENGVLTVTPK    |
| DCP1B2                | gi 52582373 | 479   | 115.10 | 731.39   | 1460.76   | 1460.75   | 0.00  | 0    | 115.10 | 0.00    | 1    | SSMENGVLTVTPK    |
| DCP1B1                | gi 5279974  | 137   | 73.64  | 503.75   | 1005.49   | 1005.51   | -0.02 | 0    | 38.78  | 6.14    | 1    | GPLYSDIGK        |
| DCP1B1                | gi 5279974  | 524   | 73.64  | 521.29   | 1560.83   | 1560.85   | -0.02 | 1    | 34.86  | 8.37    | 6    | KGDLFLADVNTQLK   |
| DCP1B2                | gi 528491   | 185   | 71.25  | 531.27   | 1060.53   | 1060.52   | 0.01  | 0    | 71.25  | 0.00    | 1    | EFADDVLPK        |
| DCP1B1                | gi 53827074 | 26    | 58.50  | 421.26   | 840.50    | 840.51    | -0.01 | 1    | 25.22  | 78.84   | 5    | ADLPGLKK         |
| DCP1B1                | gi 53827074 | 92    | 58.50  | 467.25   | 932.48    | 932.47    | 0.01  | 0    | 33.28  | 26.59   | 6    | MLQISGER         |
| DCP1B1                | gi 54535312 | 382   | 198.12 | 651.32   | 1300.63   | 1300.65   | -0.02 | 0    | 71.09  | 0.00    | 1    | ALEEANADLEVK     |
| DCP1B3                | gi 54535312 | 13    | 198.12 | 404.20   | 806.39    | 806.39    | 0.00  | 0    | 25.50  | 135.78  | 5    | LAADDFR          |
| DCP1B1                | gi 54535312 | 14    | 198.12 | 404.20   | 806.39    | 806.39    | 0.00  | 0    | 31.97  | 28.05   | 2    | LAADDFR          |
| DCP1B2                | gi 54535312 | 15    | 198.12 | 404.21   | 806.40    | 806.39    | 0.01  | 0    | 33.80  | 18.52   | 2    | LAADDFR          |
| DCP1B2                | gi 54535312 | 17    | 198.12 | 405.22   | 808.42    | 808.43    | -0.01 | 0    | 39.34  | 5.76    | 2    | LASYLDK          |
| DCP1B3                | gi 54535312 | 155   | 198.12 | 516.30   | 1030.58   | 1030.59   | -0.01 | 0    | 47.39  | 0.77    | 1    | VLDELTLTK        |
| DCP1B2                | gi 54535312 | 156   | 198.12 | 516.30   | 1030.58   | 1030.59   | -0.01 | 0    | 29.62  | 37.96   | 1    | VLDELTLTK        |
| DCP1B1                | gi 54535312 | 157   | 198.12 | 516.30   | 1030.59   | 1030.59   | 0.00  | 0    | 53.89  | 0.11    | 1    | VLDELTLTK        |
| DCP1B1                | gi 55827991 | 253   | 123.12 | 579.26   | 1156.51   | 1156.51   | 0.00  | 1    | 10.28  | 1388.93 | 10   | AGRXPQGXPR       |



Table S2. Contd.....

| SDS_PAGE<br>Zone Code | Accession   | Query | Score  | Observed | Mr (expt) | Mr (calc) | Delta | Miss | Score | Expect  | Rank | Peptide Sequence                  |
|-----------------------|-------------|-------|--------|----------|-----------|-----------|-------|------|-------|---------|------|-----------------------------------|
| DCP1B2                | gij55827991 | 262   | 123.12 | 581.77   | 1161.53   | 1161.54   | -0.01 | 0    | 63.87 | 0.01    | 1    | DAVITYTEHAR                       |
| DCP1B1                | gij55827991 | 263   | 123.12 | 581.78   | 1161.54   | 1161.54   | 0.00  | 0    | 37.47 | 5.53    | 1    | DAVITYTEHAR                       |
| DCP1B1                | gij55827991 | 283   | 123.12 | 590.81   | 1179.60   | 1179.61   | -0.01 | 0    | 48.97 | 0.53    | 2    | ISGLIYEETR                        |
| DCP1B1                | gij56918004 | 375   | 54.67  | 643.81   | 1285.60   | 1285.59   | 0.00  | 0    | 54.67 | 0.09    | 1    | SVSEGGIGFDYR                      |
| DCP1B1                | gij56918725 | 298   | 150.46 | 596.81   | 1191.60   | 1191.61   | -0.01 | 0    | 65.50 | 0.01    | 1    | AVEIYEEIAR                        |
| DCP1B1                | gij56918725 | 345   | 150.46 | 622.34   | 1242.66   | 1242.66   | 0.00  | 0    | 69.45 | 0.00    | 1    | GDVVAISNALER                      |
| DCP1B1                | gij56918725 | 457   | 150.46 | 700.32   | 1398.62   | 1398.64   | -0.02 | 0    | 15.51 | 461.74  | 2    | YQDLDPFTSGTR                      |
| DCP1B2                | gij56920204 | 260   | 249.71 | 580.78   | 1159.54   | 1159.56   | -0.02 | 0    | 57.19 | 0.05    | 1    | EEDTTVPIEK                        |
| DCP1B3                | gij56920204 | 261   | 249.71 | 580.78   | 1159.55   | 1159.56   | -0.01 | 0    | 20.53 | 285.93  | 1    | EEDTTVPIEK                        |
| DCP1B3                | gij56920204 | 377   | 249.71 | 644.83   | 1287.64   | 1287.66   | -0.02 | 1    | 42.54 | 2.12    | 2    | KEEDTTVPIEK                       |
| DCP1B2                | gij56920204 | 378   | 249.71 | 644.83   | 1287.64   | 1287.66   | -0.02 | 1    | 73.61 | 0.00    | 1    | KEEDTTVPIEK                       |
| DCP1B2                | gij56920204 | 646   | 249.71 | 788.87   | 3151.46   | 3151.52   | -0.06 | 0    | 9.22  | 527.13  | 1    | KPEEVATPPPPPPTEH<br>VHAESASHEGEAK |
| DCP1B3                | gij56920204 | 169   | 249.71 | 522.76   | 1043.50   | 1043.51   | -0.01 | 0    | 27.72 | 54.22   | 1    | VQVSEPEEK                         |
| DCP1B2                | gij56920204 | 482   | 249.71 | 734.31   | 1466.60   | 1466.62   | -0.01 | 0    | 74.18 | 0.00    | 1    | YEEAEAAANQADEK                    |
| DCP1B2                | gij56920204 | 535   | 249.71 | 532.57   | 1594.68   | 1594.71   | -0.03 | 1    | 7.79  | 1480.99 | 2    | YEEAEAAANQADEKK                   |
| DCP1B1                | gij56920981 | 26    | 226.18 | 421.26   | 840.50    | 840.51    | -0.01 | 1    | 25.22 | 78.84   | 5    | ADLPGLKK                          |
| DCP1B1                | gij56920981 | 192   | 226.18 | 537.26   | 1072.50   | 1072.52   | -0.02 | 0    | 17.91 | 433.33  | 1    | ETPESHVFK                         |
| DCP1B1                | gij56920981 | 117   | 226.18 | 487.77   | 973.53    | 973.53    | 0.00  | 1    | 35.74 | 13.59   | 2    | FRLPENAK                          |
| DCP1B3                | gij56920981 | 501   | 226.18 | 755.85   | 1509.69   | 1509.71   | -0.02 | 0    | 26.96 | 38.08   | 1    | SELANETSAFANTR                    |
| DCP1B2                | gij56920981 | 502   | 226.18 | 755.86   | 1509.70   | 1509.71   | -0.01 | 0    | 95.40 | 0.00    | 1    | SELANETSAFANTR                    |
| DCP1B2                | gij56920981 | 74    | 226.18 | 451.25   | 900.49    | 900.50    | -0.02 | 0    | 51.91 | 0.39    | 5    | VLQISGER                          |
| DCP1B3                | gij56920981 | 75    | 226.18 | 451.25   | 900.49    | 900.50    | -0.01 | 0    | 51.07 | 0.46    | 5    | VLQISGER                          |
| DCP1B1                | gij56920981 | 76    | 226.18 | 451.26   | 900.50    | 900.50    | -0.01 | 0    | 45.86 | 1.51    | 5    | VLQISGER                          |
| DCP1B1                | gij56920981 | 77    | 226.18 | 451.26   | 900.51    | 900.50    | 0.00  | 0    | 51.27 | 0.41    | 5    | VLQISGER                          |
| DCP1B1                | gij56921806 | 474   | 156.66 | 726.37   | 1450.72   | 1450.72   | 0.00  | 0    | 61.76 | 0.02    | 1    | DLVGVAYTEEEVK                     |
| DCP1B1                | gij56921806 | 451   | 156.66 | 696.34   | 1390.66   | 1390.66   | -0.01 | 0    | 32.95 | 14.58   | 1    | FPQPYANEQAAR                      |
| DCP1B1                | gij56921806 | 583   | 156.66 | 621.64   | 1861.89   | 1861.91   | -0.02 | 1    | 61.95 | 0.01    | 2    | LSDRFPQPYANEQAAR                  |
| DCP1B3                | gij56924004 | 342   | 58.00  | 620.30   | 1238.58   | 1238.59   | -0.02 | 0    | 34.68 | 9.40    | 1    | EPAFFTGSEVR                       |
| DCP1B2                | gij56924004 | 212   | 58.00  | 548.78   | 1095.54   | 1095.56   | -0.01 | 0    | 23.32 | 173.27  | 1    | HEEVVEQVK                         |
| DCP1B3                | gij56927029 | 42    | 121.23 | 426.73   | 851.45    | 851.45    | 0.00  | 0    | 52.44 | 0.26    | 1    | FVFAGPSK                          |
| DCP1B2                | gij56927029 | 570   | 121.23 | 888.98   | 1775.94   | 1775.92   | 0.02  | 0    | 68.79 | 0.00    | 2    | YIAPEQVPVQYGGLSR                  |
| DCP1B2                | gij58121190 | 50    | 61.40  | 429.73   | 857.45    | 857.46    | -0.01 | 0    | 61.40 | 0.04    | 4    | LLEVDGGR                          |
| DCP1B1                | gij58208336 | 26    | 91.89  | 421.26   | 840.50    | 840.51    | -0.01 | 1    | 25.22 | 78.84   | 5    | ADLPGLKK                          |
| DCP1B1                | gij58208336 | 117   | 91.89  | 487.77   | 973.53    | 973.53    | 0.00  | 1    | 35.74 | 13.59   | 2    | FRLPENAK                          |
| DCP1B2                | gij58208336 | 502   | 91.89  | 755.86   | 1509.70   | 1509.71   | -0.01 | 0    | 30.93 | 17.08   | 2    | SELSNETAAFANTR                    |

Table S2. Contd.....

| SDS_PAGE<br>Zone Code | Accession   | Query | Score  | Observed | Mr (expt) | Mr (calc) | Delta | Miss | Score | Expect  | Rank | Peptide Sequence       |
|-----------------------|-------------|-------|--------|----------|-----------|-----------|-------|------|-------|---------|------|------------------------|
| DCP1B2                | gi 58600440 | 119   | 107.29 | 488.28   | 974.54    | 974.55    | -0.01 | 0    | 38.73 | 5.60    | 1    | IGLFGGAGVVGK           |
| DCP1B3                | gi 58600440 | 101   | 107.29 | 478.77   | 955.53    | 955.55    | -0.01 | 0    | 46.39 | 0.92    | 1    | VLNTGSPIR              |
| DCP1B2                | gi 58600440 | 277   | 107.29 | 587.33   | 1172.64   | 1172.66   | -0.02 | 0    | 22.17 | 223.60  | 1    | VVDLLAPYQR             |
| DCP1B2                | gi 61962850 | 206   | 75.06  | 541.79   | 1081.57   | 1081.59   | -0.02 | 1    | 9.69  | 4073.04 | 8    | FASFDKVR               |
| DCP1B3                | gi 61962850 | 371   | 75.06  | 639.35   | 1276.68   | 1276.70   | -0.02 | 0    | 33.15 | 17.29   | 2    | LALDIEIATYR            |
| DCP1B1                | gi 61962850 | 247   | 75.06  | 576.78   | 1151.54   | 1151.55   | -0.01 | 1    | 18.04 | 454.55  | 4    | NKYEDEINK              |
| DCP1B1                | gi 61962850 | 555   | 75.06  | 572.61   | 1714.80   | 1714.79   | 0.01  | 1    | 14.18 | 732.61  | 4    | TAAESRAAEAAAAAS<br>TXR |
| DCP1B2                | gi 62844198 | 211   | 92.48  | 547.26   | 1092.51   | 1092.52   | -0.01 | 0    | 26.16 | 85.43   | 3    | AQYEDIAQR              |
| DCP1B2                | gi 62844198 | 206   | 92.48  | 541.79   | 1081.57   | 1081.59   | -0.02 | 1    | 9.69  | 4073.04 | 8    | FASFDKVR               |
| DCP1B1                | gi 62844198 | 319   | 92.48  | 604.80   | 1207.59   | 1207.61   | -0.02 | 0    | 56.63 | 0.08    | 1    | TAAENDFVTLK            |
| DCP1B2                | gi 62873293 | 235   | 61.90  | 563.27   | 1124.52   | 1124.53   | -0.02 | 0    | 23.95 | 111.79  | 1    | AEAESVYQTK             |
| DCP1B1                | gi 62873293 | 236   | 61.90  | 563.27   | 1124.53   | 1124.53   | 0.00  | 0    | 26.05 | 79.43   | 1    | AEAESVYQTK             |
| DCP1B2                | gi 62873293 | 211   | 61.90  | 547.26   | 1092.51   | 1092.52   | -0.01 | 0    | 26.16 | 85.43   | 3    | AQYEDIAQR              |
| DCP1B2                | gi 62873293 | 206   | 61.90  | 541.79   | 1081.57   | 1081.59   | -0.02 | 1    | 9.69  | 4073.04 | 8    | FASFDKVR               |
| DCP1B1                | gi 62895721 | 26    | 77.13  | 421.26   | 840.50    | 840.51    | -0.01 | 1    | 25.22 | 78.84   | 5    | ADLPGLKK               |
| DCP1B2                | gi 62895721 | 74    | 77.13  | 451.25   | 900.49    | 900.50    | -0.02 | 0    | 51.91 | 0.39    | 2    | VIQISGER               |
| DCP1B3                | gi 62895721 | 75    | 77.13  | 451.25   | 900.49    | 900.50    | -0.01 | 0    | 51.07 | 0.46    | 2    | VIQISGER               |
| DCP1B1                | gi 62895721 | 76    | 77.13  | 451.26   | 900.50    | 900.50    | -0.01 | 0    | 45.86 | 1.51    | 2    | VIQISGER               |
| DCP1B1                | gi 62895721 | 77    | 77.13  | 451.26   | 900.51    | 900.50    | 0.00  | 0    | 51.27 | 0.41    | 2    | VIQISGER               |
| DCP1B2                | gi 67056530 | 114   | 60.68  | 487.26   | 972.51    | 972.52    | -0.02 | 0    | 60.68 | 0.05    | 3    | LELSEINR               |
| DCP1B3                | gi 67056530 | 115   | 60.68  | 487.26   | 972.51    | 972.52    | -0.02 | 0    | 45.11 | 1.58    | 4    | LELSEINR               |
| DCP1B1                | gi 67208610 | 140   | 179.45 | 505.75   | 1009.48   | 1009.48   | 0.00  | 0    | 37.19 | 6.61    | 1    | ENSAFVSTR              |
| DCP1B1                | gi 67208610 | 117   | 179.45 | 487.77   | 973.53    | 973.53    | 0.00  | 1    | 35.74 | 13.59   | 2    | FRLPENAK               |
| DCP1B1                | gi 67208610 | 567   | 179.45 | 586.64   | 1756.89   | 1756.90   | 0.00  | 1    | 54.61 | 0.09    | 1    | VEIEDDRVLIQISGER       |
| DCP1B2                | gi 67208610 | 74    | 179.45 | 451.25   | 900.49    | 900.50    | -0.02 | 0    | 51.91 | 0.39    | 5    | VLQISGER               |
| DCP1B3                | gi 67208610 | 75    | 179.45 | 451.25   | 900.49    | 900.50    | -0.01 | 0    | 51.07 | 0.46    | 5    | VLQISGER               |
| DCP1B1                | gi 67208610 | 76    | 179.45 | 451.26   | 900.50    | 900.50    | -0.01 | 0    | 45.86 | 1.51    | 5    | VLQISGER               |
| DCP1B1                | gi 67208610 | 77    | 179.45 | 451.26   | 900.51    | 900.50    | 0.00  | 0    | 51.27 | 0.41    | 5    | VLQISGER               |
| DCP1B1                | gi 67211137 | 520   | 97.61  | 772.85   | 1543.68   | 1543.69   | -0.01 | 0    | 97.61 | 0.00    | 1    | SEFANETSAFANTR         |
| DCP1B3                | gi 67211197 | 364   | 66.03  | 635.33   | 1268.65   | 1268.67   | -0.02 | 0    | 21.30 | 278.40  | 1    | VLAEDAYVVVK            |
| DCP1B1                | gi 67211197 | 365   | 66.03  | 635.34   | 1268.66   | 1268.67   | 0.00  | 0    | 66.03 | 0.01    | 1    | VLAEDAYVVVK            |
| DCP1B1                | gi 68328510 | 382   | 93.32  | 651.32   | 1300.63   | 1300.65   | -0.02 | 0    | 21.14 | 244.96  | 2    | ALEDANAELEVK           |
| DCP1B3                | gi 68328510 | 13    | 93.32  | 404.20   | 806.39    | 806.39    | 0.00  | 0    | 25.50 | 135.78  | 5    | LAADDFR                |
| DCP1B1                | gi 68328510 | 14    | 93.32  | 404.20   | 806.39    | 806.39    | 0.00  | 0    | 31.97 | 28.05   | 2    | LAADDFR                |
| DCP1B2                | gi 68328510 | 15    | 93.32  | 404.21   | 806.40    | 806.39    | 0.01  | 0    | 33.80 | 18.52   | 2    | LAADDFR                |

Table S2. Contd.....

| SDS_PAGE<br>Zone Code | Accession   | Query | Score  | Observed | Mr (expt) | Mr (calc) | Delta | Miss | Score | Expect | Rank | Peptide Sequence |
|-----------------------|-------------|-------|--------|----------|-----------|-----------|-------|------|-------|--------|------|------------------|
| DCP1B3                | gi 68328510 | 41    | 93.32  | 424.22   | 846.43    | 846.44    | -0.02 | 0    | 38.38 | 10.25  | 6    | SEITELR          |
| DCP1B2                | gi 71568401 | 211   | 65.50  | 547.26   | 1092.51   | 1092.52   | -0.01 | 0    | 26.16 | 85.43  | 4    | AQYEDLAQR        |
| DCP1B2                | gi 71568401 | 17    | 65.50  | 405.22   | 808.42    | 808.43    | -0.01 | 0    | 39.34 | 5.76   | 2    | LASYLDK          |
| DCP1B1                | gi 71865472 | 298   | 65.50  | 596.81   | 1191.60   | 1191.61   | -0.01 | 0    | 65.50 | 0.01   | 2    | GIEIYEEIAR       |
| DCP1B1                | gi 7233578  | 26    | 167.48 | 421.26   | 840.50    | 840.51    | -0.01 | 1    | 25.22 | 78.84  | 3    | ADIPGLKK         |
| DCP1B1                | gi 7233578  | 117   | 167.48 | 487.77   | 973.53    | 973.53    | 0.00  | 1    | 35.74 | 13.59  | 2    | FRLPENAK         |
| DCP1B1                | gi 7233578  | 567   | 167.48 | 586.64   | 1756.89   | 1756.90   | 0.00  | 1    | 54.61 | 0.09   | 1    | VEIEDDRVLQISGER  |
| DCP1B2                | gi 7233578  | 74    | 167.48 | 451.25   | 900.49    | 900.50    | -0.02 | 0    | 51.91 | 0.39   | 5    | VLQISGER         |
| DCP1B3                | gi 7233578  | 75    | 167.48 | 451.25   | 900.49    | 900.50    | -0.01 | 0    | 51.07 | 0.46   | 5    | VLQISGER         |
| DCP1B1                | gi 7233578  | 76    | 167.48 | 451.26   | 900.50    | 900.50    | -0.01 | 0    | 45.86 | 1.51   | 5    | VLQISGER         |
| DCP1B1                | gi 7233578  | 77    | 167.48 | 451.26   | 900.51    | 900.50    | 0.00  | 0    | 51.27 | 0.41   | 5    | VLQISGER         |
| DCP1B2                | gi 7238484  | 570   | 68.79  | 888.98   | 1775.94   | 1775.96   | -0.02 | 1    | 68.79 | 0.00   | 1    | YIAPEQVPVKYGGLSR |
| DCP1B1                | gi 7284912  | 26    | 95.32  | 421.26   | 840.50    | 840.51    | -0.01 | 1    | 25.22 | 78.84  | 3    | ADIPGLKK         |
| DCP1B1                | gi 7284912  | 487   | 95.32  | 739.39   | 1476.76   | 1476.73   | 0.02  | 0    | 18.19 | 483.04 | 3    | ASMENGLVLTMTVPK  |
| DCP1B2                | gi 7284912  | 74    | 95.32  | 451.25   | 900.49    | 900.50    | -0.02 | 0    | 51.91 | 0.39   | 5    | VLQISGER         |
| DCP1B3                | gi 7284912  | 75    | 95.32  | 451.25   | 900.49    | 900.50    | -0.01 | 0    | 51.07 | 0.46   | 5    | VLQISGER         |
| DCP1B1                | gi 7284912  | 76    | 95.32  | 451.26   | 900.50    | 900.50    | -0.01 | 0    | 45.86 | 1.51   | 5    | VLQISGER         |
| DCP1B1                | gi 7284912  | 77    | 95.32  | 451.26   | 900.51    | 900.50    | 0.00  | 0    | 51.27 | 0.41   | 5    | VLQISGER         |
| DCP1B1                | gi 7325689  | 189   | 63.88  | 533.26   | 1064.51   | 1064.51   | -0.01 | 0    | 30.08 | 36.89  | 2    | AQYDELAQK        |
| DCP1B3                | gi 7325689  | 13    | 63.88  | 404.20   | 806.39    | 806.39    | 0.00  | 0    | 25.50 | 135.78 | 5    | LAADDFR          |
| DCP1B1                | gi 7325689  | 14    | 63.88  | 404.20   | 806.39    | 806.39    | 0.00  | 0    | 31.97 | 28.05  | 2    | LAADDFR          |
| DCP1B2                | gi 7325689  | 15    | 63.88  | 404.21   | 806.40    | 806.39    | 0.01  | 0    | 33.80 | 18.52  | 2    | LAADDFR          |
| DCP1B1                | gi 74115952 | 94    | 71.93  | 472.77   | 943.53    | 943.52    | 0.01  | 0    | 22.96 | 262.72 | 5    | AGLQFPVGR        |
| DCP1B1                | gi 74115952 | 283   | 71.93  | 590.81   | 1179.60   | 1179.61   | -0.01 | 0    | 48.97 | 0.53   | 2    | ISGLIYEETR       |
| DCP1B2                | gi 78335658 | 50    | 61.40  | 429.73   | 857.45    | 857.46    | -0.01 | 0    | 61.40 | 0.04   | 2    | ILEVDNR          |
| DCP1B1                | gi 8172498  | 26    | 167.48 | 421.26   | 840.50    | 840.51    | -0.01 | 1    | 25.22 | 78.84  | 5    | ADLPGLKK         |
| DCP1B1                | gi 8172498  | 117   | 167.48 | 487.77   | 973.53    | 973.53    | 0.00  | 1    | 35.74 | 13.59  | 2    | FRLPENAK         |
| DCP1B1                | gi 8172498  | 567   | 167.48 | 586.64   | 1756.89   | 1756.90   | 0.00  | 1    | 54.61 | 0.09   | 1    | VEIEDDRVLQISGER  |
| DCP1B2                | gi 8172498  | 74    | 167.48 | 451.25   | 900.49    | 900.50    | -0.02 | 0    | 51.91 | 0.39   | 5    | VLQISGER         |
| DCP1B3                | gi 8172498  | 75    | 167.48 | 451.25   | 900.49    | 900.50    | -0.01 | 0    | 51.07 | 0.46   | 5    | VLQISGER         |
| DCP1B1                | gi 8172498  | 76    | 167.48 | 451.26   | 900.50    | 900.50    | -0.01 | 0    | 45.86 | 1.51   | 5    | VLQISGER         |
| DCP1B1                | gi 8172498  | 77    | 167.48 | 451.26   | 900.51    | 900.50    | 0.00  | 0    | 51.27 | 0.41   | 5    | VLQISGER         |
| DCP1B1                | gi 82971987 | 382   | 225.21 | 651.32   | 1300.63   | 1300.65   | -0.02 | 0    | 71.09 | 0.00   | 1    | ALEEANADLEVK     |
| DCP1B3                | gi 82971987 | 417   | 225.21 | 669.83   | 1337.65   | 1337.66   | 0.00  | 0    | 15.34 | 926.64 | 3    | APSAYGGLSVSSSR   |
| DCP1B3                | gi 82971987 | 13    | 225.21 | 404.20   | 806.39    | 806.39    | 0.00  | 0    | 25.50 | 135.78 | 5    | LAADDFR          |
| DCP1B1                | gi 82971987 | 14    | 225.21 | 404.20   | 806.39    | 806.39    | 0.00  | 0    | 31.97 | 28.05  | 2    | LAADDFR          |

Table S2. Contd.....

| SDS_PAGE<br>Zone Code | Accession   | Query | Score  | Observed | Mr (expt) | Mr (calc) | Delta | Miss | Score | Expect  | Rank | Peptide Sequence |
|-----------------------|-------------|-------|--------|----------|-----------|-----------|-------|------|-------|---------|------|------------------|
| DCP1B2                | gij82971987 | 15    | 225.21 | 404.21   | 806.40    | 806.39    | 0.01  | 0    | 33.80 | 18.52   | 2    | LAADDFR          |
| DCP1B2                | gij82971987 | 17    | 225.21 | 405.22   | 808.42    | 808.43    | -0.01 | 0    | 39.34 | 5.76    | 2    | LASYLDK          |
| DCP1B1                | gij82971987 | 153   | 225.21 | 515.30   | 1028.58   | 1028.59   | 0.00  | 0    | 42.66 | 2.00    | 2    | VLDELTLAR        |
| DCP1B2                | gij82971987 | 154   | 225.21 | 515.30   | 1028.59   | 1028.59   | 0.00  | 0    | 41.65 | 2.38    | 2    | VLDELTLAR        |
| DCP1B2                | gij82971987 | 210   | 225.21 | 545.76   | 1089.50   | 1089.52   | -0.02 | 0    | 22.98 | 156.65  | 2    | VTMQNLNDR        |
| DCP1B2                | gij82972689 | 219   | 143.83 | 554.27   | 1106.52   | 1106.54   | -0.02 | 0    | 47.65 | 0.57    | 1    | AQYEEIAQR        |
| DCP1B1                | gij82972689 | 220   | 143.83 | 554.27   | 1106.54   | 1106.54   | 0.00  | 0    | 48.46 | 0.55    | 1    | AQYEEIAQR        |
| DCP1B2                | gij82972689 | 206   | 143.83 | 541.79   | 1081.57   | 1081.59   | -0.02 | 1    | 9.69  | 4073.04 | 8    | FASFDKVR         |
| DCP1B1                | gij82972689 | 247   | 143.83 | 576.78   | 1151.54   | 1151.55   | -0.01 | 1    | 18.04 | 454.55  | 4    | NKYEDEINK        |
| DCP1B3                | gij82972689 | 264   | 143.83 | 583.29   | 1164.56   | 1164.58   | -0.02 | 0    | 67.64 | 0.01    | 1    | YEELQVTAGR       |
| DCP1B1                | gij82972689 | 268   | 143.83 | 583.30   | 1164.58   | 1164.58   | 0.00  | 0    | 58.41 | 0.06    | 1    | YEELQVTAGR       |
| DCP1B2                | gij82973417 | 206   | 121.21 | 541.79   | 1081.57   | 1081.59   | -0.02 | 1    | 9.69  | 4073.04 | 8    | FASFDKVR         |
| DCP1B3                | gij82973417 | 194   | 121.21 | 537.29   | 1072.57   | 1072.59   | -0.02 | 1    | 34.22 | 18.49   | 1    | LRSEIDNVK        |
| DCP1B2                | gij82973417 | 195   | 121.21 | 537.29   | 1072.57   | 1072.59   | -0.02 | 1    | 45.23 | 1.45    | 4    | LRSEIDNVK        |
| DCP1B1                | gij82973417 | 247   | 121.21 | 576.78   | 1151.54   | 1151.55   | -0.01 | 1    | 18.04 | 454.55  | 4    | NKYEDEINK        |
| DCP1B3                | gij82973417 | 299   | 121.21 | 597.78   | 1193.55   | 1193.57   | -0.01 | 0    | 48.25 | 0.41    | 1    | YEELQVTAGR       |
| DCP1B2                | gij82974719 | 219   | 292.92 | 554.27   | 1106.52   | 1106.54   | -0.02 | 0    | 47.65 | 0.57    | 1    | AQYEEIAQR        |
| DCP1B1                | gij82974719 | 220   | 292.92 | 554.27   | 1106.54   | 1106.54   | 0.00  | 0    | 48.46 | 0.55    | 1    | AQYEEIAQR        |
| DCP1B1                | gij82974719 | 244   | 292.92 | 571.26   | 1140.50   | 1140.51   | -0.01 | 0    | 27.05 | 33.94   | 1    | DYQELMNTK        |
| DCP1B1                | gij82974719 | 484   | 292.92 | 738.39   | 1474.76   | 1474.78   | -0.02 | 0    | 77.38 | 0.00    | 1    | FLEQQNQLQTK      |
| DCP1B3                | gij82974719 | 485   | 292.92 | 738.40   | 1474.78   | 1474.78   | 0.00  | 0    | 27.99 | 48.59   | 3    | FLEQQNQLQTK      |
| DCP1B2                | gij82974719 | 486   | 292.92 | 738.40   | 1474.78   | 1474.78   | 0.00  | 0    | 72.05 | 0.00    | 1    | FLEQQNQLQTK      |
| DCP1B1                | gij82974719 | 510   | 292.92 | 508.60   | 1522.77   | 1522.78   | -0.01 | 1    | 17.07 | 751.78  | 1    | LLRDYQELMNTK     |
| DCP1B2                | gij82974719 | 448   | 292.92 | 692.34   | 1382.66   | 1382.68   | -0.02 | 0    | 54.80 | 0.09    | 1    | SLNNQFASFDK      |
| DCP1B2                | gij82974719 | 160   | 292.92 | 517.25   | 1032.49   | 1032.51   | -0.02 | 0    | 42.71 | 2.16    | 1    | TLLEGEESR        |
| DCP1B3                | gij82974719 | 161   | 292.92 | 517.25   | 1032.49   | 1032.51   | -0.02 | 0    | 68.16 | 0.01    | 1    | TLLEGEESR        |
| DCP1B1                | gij82974719 | 162   | 292.92 | 517.26   | 1032.50   | 1032.51   | -0.01 | 0    | 50.62 | 0.40    | 1    | TLLEGEESR        |
| DCP1B1                | gij82974719 | 163   | 292.92 | 517.26   | 1032.50   | 1032.51   | -0.01 | 0    | 49.33 | 0.53    | 1    | TLLEGEESR        |
| DCP1B1                | gij82976817 | 382   | 293.16 | 651.32   | 1300.63   | 1300.65   | -0.02 | 0    | 71.09 | 0.00    | 1    | ALEEANADLEVK     |
| DCP1B2                | gij82976817 | 326   | 293.16 | 610.80   | 1219.58   | 1219.59   | -0.02 | 0    | 28.03 | 47.51   | 1    | ASLENSLEETK      |
| DCP1B1                | gij82976817 | 327   | 293.16 | 610.80   | 1219.59   | 1219.59   | -0.01 | 0    | 22.97 | 175.57  | 2    | ASLENSLEETK      |
| DCP1B2                | gij82976817 | 431   | 293.16 | 681.34   | 1360.67   | 1360.68   | -0.01 | 0    | 50.20 | 0.34    | 1    | EVATNSELVQSGK    |
| DCP1B3                | gij82976817 | 432   | 293.16 | 681.35   | 1360.68   | 1360.68   | -0.01 | 0    | 53.76 | 0.15    | 1    | EVATNSELVQSGK    |
| DCP1B1                | gij82976817 | 433   | 293.16 | 681.35   | 1360.69   | 1360.68   | 0.00  | 0    | 55.26 | 0.11    | 1    | EVATNSELVQSGK    |
| DCP1B3                | gij82976817 | 13    | 293.16 | 404.20   | 806.39    | 806.39    | 0.00  | 0    | 25.50 | 135.78  | 5    | LAADDFR          |
| DCP1B1                | gij82976817 | 14    | 293.16 | 404.20   | 806.39    | 806.39    | 0.00  | 0    | 31.97 | 28.05   | 2    | LAADDFR          |

Table S2. Contd.....

| SDS_PAGE Zone Code | Accession   | Query | Score  | Observed | Mr (expt) | Mr (calc) | Delta | Miss | Score | Expect  | Rank | Peptide Sequence |
|--------------------|-------------|-------|--------|----------|-----------|-----------|-------|------|-------|---------|------|------------------|
| DCP1B2             | gi 82976817 | 15    | 293.16 | 404.21   | 806.40    | 806.39    | 0.01  | 0    | 33.80 | 18.52   | 2    | LAADDFR          |
| DCP1B2             | gi 82976817 | 17    | 293.16 | 405.22   | 808.42    | 808.43    | -0.01 | 0    | 39.34 | 5.76    | 2    | LASYLDK          |
| DCP1B1             | gi 82976817 | 153   | 293.16 | 515.30   | 1028.58   | 1028.59   | 0.00  | 0    | 42.66 | 2.00    | 2    | VLDELTLAR        |
| DCP1B2             | gi 82976817 | 154   | 293.16 | 515.30   | 1028.59   | 1028.59   | 0.00  | 0    | 41.65 | 2.38    | 2    | VLDELTLAR        |
| DCP1B2             | gi 82976817 | 210   | 293.16 | 545.76   | 1089.50   | 1089.52   | -0.02 | 0    | 22.98 | 156.65  | 2    | VTMQNLNDR        |
| DCP1B1             | gi 83708557 | 189   | 57.48  | 533.26   | 1064.51   | 1064.51   | -0.01 | 1    | 29.75 | 39.80   | 3    | AQYEDSPKK        |
| DCP1B2             | gi 83708557 | 206   | 57.48  | 541.79   | 1081.57   | 1081.59   | -0.02 | 1    | 9.69  | 4073.04 | 8    | FASFIDKVR        |
| DCP1B1             | gi 83708557 | 247   | 57.48  | 576.78   | 1151.54   | 1151.55   | -0.01 | 1    | 18.04 | 454.55  | 4    | NKYEDEINK        |
| DCP1B2             | gi 83916608 | 18    | 78.95  | 406.22   | 810.42    | 810.44    | -0.02 | 0    | 23.22 | 189.05  | 8    | IPGYHPK          |
| DCP1B3             | gi 83916608 | 377   | 78.95  | 644.83   | 1287.64   | 1287.62   | 0.02  | 0    | 32.86 | 19.67   | 3    | QEDETTVPIEK      |
| DCP1B2             | gi 83916608 | 378   | 78.95  | 644.83   | 1287.64   | 1287.62   | 0.02  | 0    | 55.73 | 0.10    | 2    | QEDETTVPIEK      |
| DCP1B1             | gi 86171718 | 127   | 59.50  | 495.76   | 989.51    | 989.52    | -0.01 | 0    | 21.88 | 371.45  | 2    | GPGLFSDIGK       |
| DCP1B1             | gi 86171718 | 524   | 59.50  | 521.29   | 1560.83   | 1560.85   | -0.02 | 1    | 37.62 | 4.43    | 4    | KGELFVGDNTQLK    |
| DCP1B2             | gi 86238712 | 50    | 61.40  | 429.73   | 857.45    | 857.45    | 0.00  | 0    | 61.40 | 0.04    | 5    | LLEVDNGV         |
| DCP1B1             | gi 87148168 | 345   | 56.47  | 622.34   | 1242.66   | 1242.66   | 0.00  | 0    | 56.47 | 0.09    | 2    | GDVVAVTNALER     |
| DCP1B2             | gi 87210283 | 172   | 111.27 | 523.28   | 1044.54   | 1044.56   | -0.02 | 0    | 48.82 | 0.68    | 1    | LSSPATLNSR       |
| DCP1B1             | gi 87210283 | 173   | 111.27 | 523.28   | 1044.55   | 1044.56   | -0.01 | 0    | 61.15 | 0.04    | 1    | LSSPATLNSR       |
| DCP1B1             | gi 87210283 | 32    | 111.27 | 421.75   | 841.49    | 841.50    | -0.02 | 0    | 45.36 | 0.96    | 2    | VATVSLPR         |
| DCP1B2             | gi 87210283 | 33    | 111.27 | 421.75   | 841.49    | 841.50    | -0.01 | 0    | 42.29 | 2.05    | 2    | VATVSLPR         |
| DCP1B1             | gi 87210283 | 35    | 111.27 | 421.76   | 841.51    | 841.50    | 0.01  | 0    | 50.12 | 0.25    | 2    | VATVSLPR         |
| DCP1B2             | gi 89226389 | 211   | 108.32 | 547.26   | 1092.51   | 1092.52   | -0.01 | 0    | 57.13 | 0.07    | 1    | AQYEEIANR        |
| DCP1B3             | gi 89226389 | 371   | 108.32 | 639.35   | 1276.68   | 1276.70   | -0.02 | 0    | 33.15 | 17.29   | 2    | LALDIEIATYR      |
| DCP1B1             | gi 89226389 | 247   | 108.32 | 576.78   | 1151.54   | 1151.55   | -0.01 | 1    | 18.04 | 454.55  | 4    | NKYEDEINK        |
| DCP1B1             | gi 90644699 | 333   | 55.96  | 616.33   | 1230.64   | 1230.63   | 0.01  | 1    | 55.96 | 0.11    | 1    | WGVKGCNAAR       |
| DCP1B3             | gi 9960131  | 573   | 54.72  | 892.93   | 1783.84   | 1783.86   | -0.02 | 0    | 54.72 | 0.06    | 1    | VQLDSQPPEIDNLER  |

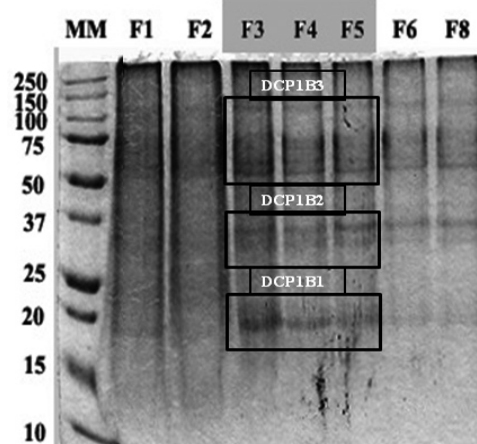

Image complement to Table S2: Proteins from Carotenoid-Protein Complex (CPC) separated in SDS-PAGE. Showing is the shaded area of fractions of the gel zone harvested for in gel tripityc digestion and MS/MS analysis. Label gel zone is coded as DCP1/DCP2/DCP3 in table discrimination.

**Table S3. Supplementary Data: Listing Identified Proteins in the Carotenoid-protein Complex Assigned to Cassava EST Data Bases (NCBI, ESTIMA, EMBRAPA, CIAT, and RIKEN) and *Arabidopsis* Loci Data Base**

| SDS_PAGE<br>Zone Code | Peptide Sequence<br>(MASCOT Server) | Cassava EST Database     | Arabidopsis<br>Locus | Total<br>Score | E_Value  | Protein Name                           | Protein<br>Abbreviation |
|-----------------------|-------------------------------------|--------------------------|----------------------|----------------|----------|----------------------------------------|-------------------------|
| DCP1B2                | VAPEEHPVLLTEAPLN                    | scaff_7813_1             | AT5G09812.1          | 310            | 2.0e-84  | ACT7                                   | ACT7                    |
| DCP1B1                | AVEIYEEIAR                          | rni.05.I9.5 MBra685      | AT3G56190.1          | 284            | 3.0e-77  | ALPHA-SNAP2, ASNAP   alpha-soluble     | ASNAP2                  |
| DCP1B1                | GDVVAISNALER                        | rni.05.I9.5 MBra685      | AT3G56190.1          | 284            | 3.0e-77  | ALPHA-SNAP2, ASNAP   alpha-soluble     | ASNAP2                  |
| DCP1B1                | GIEIYEEIAR                          | rni.05.I9.5 MBra685      | AT3G56190.1          | 284            | 3.0e-77  | ALPHA-SNAP2, ASNAP   alpha-soluble     | ASNAP2                  |
| DCP1B1                | YQDLDPFSGTR                         | rni.05.I9.5 MBra685      | AT3G56190.1          | 284            | 3.0e-77  | ALPHA-SNAP2, ASNAP   alpha-soluble     | ASNAP2                  |
| DCP1B2                | YYIGEIDASTVPAIR                     | scaff_9241_1             | AT5G09810.1          | 348            | 4.0e-96  | ATB5-A                                 | ATB5-A                  |
| DCP1B2                | DAIEGMNGQDLDRNITV<br>NEAQSR         | scaff_7404_1             | AT2G21660            | 146            | 2.0e-35  | ATGRP7                                 | ATGRP7                  |
| DCP1B2                | GFGFVTFNSEK                         | scaff_7485_2             | AT2G21660            | 89             | 1.0e-18  | ATGRP7                                 | ATGRP7                  |
| DCP1B2                | GFGFVTFNSEK                         | CAS017_B22               | ATMG01190.1          | 370            | e-103    | ATPase                                 | ATPase                  |
| DCP1B2                | IGLFGGAGVGK                         | 31706rsicef_13335.y1     | AT5G08690.1          | 265            | 1.0e-71  | ATP synthase alpha/beta family protein | ATPase                  |
| DCP1B2                | ILNVIGEPIDER                        | ABA1_32_D07.g1_A012      | AT5G08690.1          | 211            | 3.0e-55  | ATP synthase alpha/beta family protein | ATPase                  |
| DCP1B2                | ITNYTTFNQVDEIGR                     | CAS017_B22               | ATMG01190.1          | 370            | e-103    | ATPase                                 | ATPase                  |
| DCP1B2                | QISELGIYPAVDPLDSTSR                 | scaff_6888_1             | AT5G08690.1          | 288            | 9.0e-78  | ATPase                                 | ATPase                  |
| DCP1B2                | TAIAIDTILNQK                        | scaff_6888_1             | AT5G08690.1          | 288            | 9.0e-78  | ATPase                                 | ATPase                  |
| DCP1B2                | VLNTGSPIR                           | 31706rsicef_13335.y1     | AT5G08690.1          | 265            | 1.0e-71  | ATP synthase alpha/beta family protein | ATPase                  |
| DCP1B2                | VVDLLAPYQR                          | 31706rsicef_13335.y1     | AT5G08690.1          | 265            | 1.0e-71  | ATP synthase alpha/beta family protein | ATPase                  |
| DCP1B2                | VVSVGDGISR                          | scaff_8296_1             | ATCG00120.1          | 405            | e-113    | ATPase                                 | ATPase                  |
| DCP1B1                | QIVSSTNEEDKVIVFER                   | CAA54308.1               | AT2G36390.1          | 826            | 0.0      | SBE2.1, BE3   starch branching enzymy  | BE3                     |
| DCP1B3                | AGRXPQGXPR                          | c.10.J1.5 CM523-7        | AT3G27240.1          | 286            | 7.0e-78  | Cytochrome C1 family                   | Cyt_c1                  |
| DCP1B3                | ALEDANAELEVK                        | c.10.J1.5 CM523-7        | AT3G27240.1          | 286            | 7.0e-78  | Cytochrome C1 family                   | Cyt_c1                  |
| DCP1B3                | DLVGVAYTEEEVK                       | c.10.J1.5 CM523-7        | AT3G27240.1          | 286            | 7.0e-78  | Cytochrome C1 family                   | Cyt_c1                  |
| DCP1B3                | EPAFFTGSEVR                         | c.05.G19.5 CM523-7       | AT3G27240.1          | 286            | 7.0e-78  | Cytochrome C1 family                   | Cyt_c1                  |
| DCP1B3                | FPQPYANEQAAR                        | Cassava.419.C1.Contig536 | AT5G40810.1          | 373            | 7.9e-104 | Cytochrome C1 family                   | Cyt_c1                  |
| DCP1B3                | HEEVVEQVK                           | c.05.G19.5 CM523-7       | AT3G27240.1          | 286            | 7.0e-78  | Cytochrome C1 family                   | Cyt_c1                  |
| DCP1B3                | LSDRFPQPYANEQAAR                    | Cassava.419.C1.Contig536 | AT5G40810.1          | 370            | e-103    | Cytochrome C1 family                   | Cyt_c1                  |
| DCP1B3                | LSISTSFSNR                          | Cassava.419.C1.Contig536 | AT5G40810.1          | 370            | e-103    | Cytochrome C1 family                   | Cyt_c1                  |
| DCP1B3                | LLEVDNR                             | C024P63U                 | ATMG00160.1          | 91             | 1.0e-35  | Ctochrome oxidase 2                    | Cyt_c2                  |

Table S3. Contd.....

| SDS_PAGE<br>Zone Code | Peptide Sequence<br>(MASCOT Server) | Cassava EST Database           | Arabidopsis<br>Locus | Total<br>Score | E_Value  | Protein Name                                                | Protein<br>Abbreviation |
|-----------------------|-------------------------------------|--------------------------------|----------------------|----------------|----------|-------------------------------------------------------------|-------------------------|
| DCP1B3                | LNQISILVQR                          | C024P63U                       | ATMG00160.1          | 91             | 1.0e-35  | Cytochrome oxidase 2                                        | Cyt_c2                  |
| DCP1B3                | SQLNSIQEASGGK                       | CGF1000749_A02                 | AT1G54220.2          | 2409           | 0.0e-115 | Dihydroipoamide<br>acetyltransferase                        | Dihy                    |
| DCP1B3                | EEDTTVPIEK                          | si.02.O23.5 MCo11522           | AT1G20450.2          | 41             | 4.0e-04  | LTI29, LTI45, ERD10   dehydrin<br>protein family            | ERD10                   |
| DCP1B3                | KEEDTTVPIEK                         | si.02.O23.5 MCo11522           | AT1G20450.2          | 41             | 4.0e-04  | LTI29, LTI45, ERD10   dehydrin<br>protein family            | ERD10                   |
| DCP1B2                | KPEEVATPPPPPPTEHVVH<br>AESASHEGEAK  | si.02.O23.5 MCo11522           | AT1G20450.2          | 41             | 4.0e-04  | LTI29, LTI45, ERD10   dehydrin<br>protein family            | ERD10                   |
| DCP1B3                | VQVSEPEEK                           | si.02.O23.5 MCo11522           | AT1G20450.2          | 41             | 4.0e-04  | LTI29, LTI45, ERD10   dehydrin<br>protein family            | ERD10                   |
| DCP1B2                | YEEAEAAANQADEK +                    | si.02.O23.5 MCo11522           | AT1G20450.2          | 41             | 4.0e-04  | LTI29, LTI45, ERD10   dehydrin<br>protein family            | ERD10                   |
| DCP1B3                | DAIEGMNGQDLGRNITV<br>NEAQSQR        | scaff_9887_1                   | AT5G52840.1          | 275            | 6.0e-74  | NADH-ubiquinone<br>oxidoreductase-related                   | NADH                    |
| DCP1B2                | AVEDELEK                            | A022P66U                       | AT5G62740.1          | 151            | 1.0e-70  | HIR1, ATHIR1   SPFH/Band<br>7/PHB domain                    | HIR1                    |
| DCP1B2                | QAIVDGLR                            | KS12045C05 KS12                | AT5G62740.1          | 258            | 1.0e-69  | HIR1, ATHIR1   SPFH/Band<br>7/PHB domain                    | HIR1                    |
| DCP1B2                | SSAVFLPHGPAAVR                      | KS12045C05 KS12                | AT5G62740.1          | 258            | 1.0e-69  | HIR1, ATHIR1   SPFH/Band<br>7/PHB domain                    | HIR1                    |
| DCP1B2                | AGLQFPVGR                           | AU065163                       | AT5G59970.1          | 167            | 2.0e-42  | Histone superfamily protein                                 | Histone                 |
| DCP1B2                | DAVTYTEHAR                          | AU065163                       | AT5G59970.1          | 167            | 2.0e-42  | Histone superfamily protein                                 | Histone                 |
| DCP1B1                | ASMENGLVTVTVPK                      | scaff_6675_1                   | AT5G37670.1          | 154            | 4.0e-38  | HSP15.7                                                     | HSP_15.7                |
| DCP1B1                | ACMENGLVTVTVPK                      | Cassava.2670.C1.Contig27<br>92 | AT3G46230.1          | 197            | 7.2e-051 | ATHSP17.4 (Arabidopsis thaliana<br>heat shock protein 17.4) | HSP_17.4I               |
| DCP1B1                | ASMENGLVTVTVPKKEEV<br>QKPDVK        | CAS035_D18                     | AT3G46230.1          | 126            | 2.0e-47  | sHSP_17.4 kDa class I                                       | HSP_17.4I               |
| DCP1B1                | FRLPENANMDQIR                       | scaff_8565_1                   | AT3G46230            | 142            | 1.0e-34  | sHSP_17.4 kDa class I                                       | HSP_17.4I               |
| DCP1B1                | SSMENGLVTVTVPK                      | CAS037_L03.f                   | AT3G46230            | 192            | 1.0e-49  | sHSP_17.4 kDa class I                                       | HSP_17.4I               |
| DCP1B1                | VELEDGRVLQISGER                     | CAS035_D18                     | AT3G46230.1          | 126            | 2.0e-47  | sHSP_17.4 kDa class I                                       | HSP_17.4I               |
| DCP1B1                | VEVEEGRILQVSGER                     | CAS035_D18                     | AT3G46230.1          | 126            | 2.0e-47  | sHSP_17.4 kDa class I                                       | HSP_17.4I               |
| DCP1B1                | ASMENGLVTVTVPKKEEV<br>NKPEVK        | Cassava.859.C1.Contig101<br>7  | AT2G29500.1          | 146            | 1.6e-035 | sHSP_17.6 kDa class I                                       | HSP_17.6I               |
| DCP1B1                | ASMENGLVTVTVPKKEEV<br>QKPDVK        | Cassava.1764.C1.Contig19<br>43 | AT2G29500.1          | 146            | 1.6e-035 | 17.6 kDa class I small heat shock<br>protein (HSP17.6B-CI)  | HSP_17.6I               |
| DCP1B1                | ETPEAHVFEADLPLGK                    | Cassava.859.C1.Contig101<br>7  | AT2G29500            | 146            | 1.6e-035 | sHSP_17.6 kDa class I                                       | HSP_17.6I               |
| DCP1B1                | FRLPENANMDQIR                       | scaff_6764_1                   | AT2G29500.1          | 211            | 3.0e-55  | sHSP_17.6 kDa class I                                       | HSP_17.6I               |
| DCP1B1                | IDWKETPEAHVFQADLPG<br>LR            | Cassava.1764.C1.Contig19<br>43 | AT2G29500            | 146            | 1.6e-035 | sHSP_17.6 kDa class I                                       | HSP_17.6I               |

Table S3. Contd.....

| SDS_PAGE<br>Zone Code | Peptide Sequence<br>(MASCOT Server) | Cassava EST Database       | Arabidopsis<br>Locus | Total<br>Score | E_Value  | Protein Name                                            | Protein<br>Abbreviation |
|-----------------------|-------------------------------------|----------------------------|----------------------|----------------|----------|---------------------------------------------------------|-------------------------|
| DCP1B1                | IEVEDDRVLQISGER                     | Cassava.859.C1.Contig1017  | AT2G29500.1          | 146            | 1.6e-035 | 17.6 kDa class I small heat shock protein (HSP17.6B-CI) | HSP_17.6I               |
| DCP1B1                | SVSEGGIGFDYR                        | Cassava.859.C1.Contig1017  | AT2G29500.1          | 146            | 1.6e-035 | 17.6 kDa class I small heat shock protein (HSP17.6B-CI) | HSP_17.6I               |
| DCP1B1                | VEIEDDRVLQISGER                     | Cassava.1764.C1.Contig1943 | AT2G29500.1          | 146            | 1.6e-035 | 17.6 kDa class I small heat shock protein (HSP17.6B-CI) | HSP_17.6I               |
| DCP1B1                | VEVEEGRILQVSGER                     | scaff_6764_1               | AT2G29500.1          | 211            | 3.0e-55  | sHSP_17.6 kDa class I                                   | HSP_17.6I               |
| DCP1B1                | VEWKETPEAHVFK                       | Cassava.1764.C1.Contig1943 | AT2G29500.1          | 146            | 1.6e-035 | sHSP_17.6 kDa class I                                   | HSP_17.6I               |
| DCP1B2                | ASMENGLVTVTPKEEV<br>QKPDVK          | Cassava.388.C1.Contig493   | AT5G59720            | 217            | 6.3e-057 | sHSP_18.1 kDa class I                                   | HSP_18.1I               |
| DCP1B2                | ETPESHVFKADLPLGLK                   | Cassava.388.C1.Contig493   | AT5G59720            | 217            | 6.3e-057 | sHSP_18.1 kDa class I                                   | HSP_18.1I               |
| DCP1B2                | ETSAFINAR                           | Cassava.388.C1.Contig493   | AT5G59720            | 217            | 6.3e-057 | sHSP_18.1 kDa class I                                   | HSP_18.1I               |
| DCP1B2                | FPSTALSAPR                          | CAS037_M18.f               | AT5G59720.1          | 112            | 3.0e-35  | sHSP_18.1 kDa class I                                   | HSP_18.1I               |
| DCP1B2                | FRLPENAQVDQVK                       | Cassava.388.C1.Contig493   | AT5G59720            | 217            | 6.3e-057 | sHSP_18.1 kDa class I                                   | HSP_18.1I               |
| DCP1B2                | IDWKETPESHVFK                       | Cassava.388.C1.Contig493   | AT5G59720            | 217            | 6.3e-057 | sHSP_18.1 kDa class I                                   | HSP_18.1I               |
| DCP1B2                | IEVEDGRVLQISGER                     | CAS010_O01.f               | AT5G59720            | 171            | 3.0e-43  | sHSP_18.1 kDa class I                                   | HSP_18.1I               |
| DCP1B2                | LPENANMDQIR                         | Cassava.388.C1.Contig493   | AT5G59720            | 217            | 6.3e-057 | sHSP_18.1 kDa class I                                   | HSP_18.1I               |
| DCP1B2                | PFQDFPFSTALSAPR                     | CAS010_O01.f               | AT5G59720.1          | 171            | 3.0e-43  | sHSP_18.1 kDa class I                                   | HSP_18.1I               |
| DCP1B2                | SSMENGLVTVTPK                       | scaff_8870_1               | AT5G59720.1          | 220            | 7.0e-58  | sHSP_18.1 kDa class I                                   | HSP_18.1I               |
| DCP1B2                | VEIEDGRVLQISGER                     | scaff_7380_1               | AT5G59720.1          | 194            | 7.0e-50  | sHSP_18.1 kDa class I                                   | HSP_18.1I               |
| DCP1B2                | VEVEEGRILQVSGER                     | scaff_8870_1               | AT5G59720.1          | 220            | 7.0e-58  | sHSP_18.1 kDa class I                                   | HSP_18.1I               |
| DCP1B2                | ACMENGLVTVTPK                       | scaff_7380_1               | AT5G59720.1          | 194            | 7.0e-50  | HSP18.2                                                 | HSP_18.2                |
| DCP1B2                | ASMENGLVTVTPKEEV<br>QKPDVK          | Cassava.388.C1.Contig493   | AT5G59720.1          | 217            | 6.3e-057 | HSP18.2 (HEAT SHOCK<br>PROTEIN 18.2)                    | HSP_18.2                |
| DCP1B2                | FPSTALSAPR                          | CAS037_M18.f               | AT5G59720.1          | 112            | 3.0e-35  | HSP18.2   heat shock protein 18.2                       | HSP_18.2                |
| DCP1B2                | FRLPENANMDQIR                       | scaff_7380_1               | AT5G59720.1          | 194            | 7.0e-50  | Symbols: HSP18.2   heat shock<br>protein 18.2           | HSP_18.2                |
| DCP1B2                | PFSTALSAPR                          | Cassava.388.C1.Contig493   | AT5G59720.1          | 217            | 6.3e-057 | HSP18.2 (HEAT SHOCK<br>PROTEIN 18.2)                    | HSP_18.2                |
| DCP1B2                | PFQDFPFSTALSAPR                     | CAS010_O01.f               | AT5G59720.1          | 171            | 3.0e-43  | HSP18.2 (heat shock protein 18.2)                       | HSP_18.2                |
| DCP1B2                | SELANETSAFANTR                      | CAS010_O01.f               | AT5G59720.1          | 171            | 3.0e-43  | HSP18.2 (heat shock protein 18.2)                       | HSP_18.2                |
| DCP1B2                | SELSNETAAAFANTR                     | CAS010_O01.f               | AT5G59720.1          | 171            | 3.0e-43  | HSP18.2 (heat shock protein 18.2)                       | HSP_18.2                |
| DCP1B2                | VEIEDGRVLQISGER                     | scaff_7380_1               | AT5G59720.1          | 194            | 7.0e-50  | HSP18.2   heat shock protein 18.2                       | HSP_18.2                |
| DCP1B2                | VELEDGRVLQISGER                     | Cassava.388.C1.Contig493   | AT5G59720.1          | 217            | 6.3e-057 | HSP18.2 (HEAT SHOCK<br>PROTEIN 18.2)                    | HSP_18.2                |
| DCP1B2                | VEVEEGRVLQISGER                     | scaff_7380_1               | AT5G59720.1          | 194            | 7.0e-50  | HSP18.2   heat shock protein 18.2                       | HSP_18.2                |



Table S3. Contd.....

| SDS_PAGE<br>Zone Code | Peptide Sequence<br>(MASCOT Server) | Cassava EST Database           | Arabidopsis<br>Locus | Total<br>Score | E_Value  | Protein Name                         | Protein<br>Abbreviation |
|-----------------------|-------------------------------------|--------------------------------|----------------------|----------------|----------|--------------------------------------|-------------------------|
| DCP1B1                | ACMENGVLTVTVPK                      | CAS037_L20                     | AT2G29500.1          | 162            | 2.0e-40  | HSP20-like chaperones<br>superfamily | HSP_20                  |
| DCP1B1                | ADLPGLKK                            | si.05.K16.5 MCol1522           | AT1G07400.1          | 64             | 2.0e-09  | HSP20-like chaperones<br>superfamily | HSP_20                  |
| DCP1B1                | AQYEDSPKK                           | CAST023F09                     | AT2G29500.1          | 107            | 2.0e-43  | HSP20-like chaperones<br>superfamily | HSP_20                  |
| DCP1B1                | ASMENGVLTMTPVK                      | CAST023F09                     | AT2G29500.1          | 107            | 2.0e-43  | HSP20-like chaperones<br>superfamily | HSP_20                  |
| DCP1B1                | ENSAFVSTR                           | CAST023F09                     | AT2G29500.1          | 107            | 2.0e-43  | HSP20-like chaperones<br>superfamily | HSP_20                  |
| DCP1B1                | ETPESHVFK                           | si.05.K16.5 MCol1522           | AT1G07400.1          | 64             | 2.0e-09  | HSP20-like chaperones<br>superfamily | HSP_20                  |
| DCP1B1                | FRLPENAK                            | si.05.K16.5 MCol1522           | AT1G07400.1          | 64             | 2.0e-09  | HSP20-like chaperones<br>superfamily | HSP_20                  |
| DCP1B1                | FRLPENANMDQIR                       | scaff_6764_1                   | AT2G29500.1          | 211            | 3.0e-55  | HSP20-like chaperones<br>superfamily | HSP_20                  |
| DCP1B1                | GPGLYSDIGK                          | saq58h07.y1 Gm-c1076           | AT2G29500.1          | 241            | 3.0e-64  | HSP20-like chaperones<br>superfamily | HSP_20                  |
| DCP1B1                | ISGLIYEETR                          | si.05.K16.5 MCol1522           | AT1G07400.1          | 64             | 2.0e-09  | HSP20-like chaperones<br>superfamily | HSP_20                  |
| DCP1B1                | KGDLFLADVNTQLK                      | si.05.K16.5 MCol1522           | AT1G07400.1          | 64             | 2.0e-09  | HSP20-like chaperones<br>superfamily | HSP_20                  |
| DCP1B1                | SEFANETSAFANTR                      | CAST050D04                     | AT1G07400.1          | 53             | 4.0e-08  | HSP20-like chaperones<br>superfamily | HSP_20                  |
| DCP1B3                | SELANETSAFANTR                      | si.05.K16.5 MCol1522           | AT1G07400.1          | 64             | 2.0e-09  | HSP20-like chaperones<br>superfamily | HSP_20                  |
| DCP1B1                | SSMENGVLTVTVPK                      | CAS037_L20                     | AT2G29500.1          | 162            | 2.0e-40  | HSP20-like chaperones<br>superfamily | HSP_20                  |
| DCP1B1                | VELEDGRVLQISGER                     | CAS037_L20                     | AT2G29500.1          | 162            | 2.0e-40  | HSP20-like chaperones<br>superfamily | HSP_20                  |
| DCP1B1                | VEVEEGRVLQISGER                     | CAS037_L20                     | AT2G29500.1          | 162            | 2.0e-40  | HSP20-like chaperones<br>superfamily | HSP_20                  |
| DCP1B2                | VLQISGER                            | si.05.K16.5 MCol1522           | AT1G07400.1          | 64             | 2.0e-09  | HSP20-like chaperones<br>superfamily | HSP_20                  |
| DCP1B2                | AELKNGVLFISIPK +                    | Cassava.1282.C1.Contig14<br>55 | AT4G27670.1          | 213            | 1.2e-055 | HSP21 (HEAT SHOCK<br>PROTEIN 21)     | HSP_21                  |
| DCP1B2                | APWDIKEDENEFK +                     | Cassava.1282.C1.Contig14<br>55 | AT4G27670.1          | 213            | 1.2e-055 | HSP21 (HEAT SHOCK<br>PROTEIN 21)     | HSP_21                  |
| DCP1B2                | FDMPGLSKEDVK +                      | Cassava.1282.C1.Contig14<br>55 | AT4G27670.1          | 213            | 1.2e-055 | HSP21 (HEAT SHOCK<br>PROTEIN 21)     | HSP_21                  |
| DCP1B2                | IFEDAMTLPGSR                        | scaff_6656_1                   | AT4G27670.1          | 131            | 1.0e-30  | HSP21                                | HSP_21                  |
| DCP1B2                | KVIDVEIQ +                          | Cassava.1282.C1.Contig14<br>55 | AT4G27670.1          | 213            | 1.2e-055 | HSP21 (HEAT SHOCK<br>PROTEIN 21)     | HSP_21                  |

Table S3. Contd.....

| SDS_PAGE<br>Zone Code | Peptide Sequence<br>(MASCOT Server) | Cassava EST Database       | Arabidopsis<br>Locus | Total<br>Score | E_Value  | Protein Name                                                         | Protein<br>Abbreviation |
|-----------------------|-------------------------------------|----------------------------|----------------------|----------------|----------|----------------------------------------------------------------------|-------------------------|
| DCP1B2                | LRFDMPGLSK +                        | Cassava.1282.C1.Contig1455 | AT4G27670.1          | 213            | 1.2e-055 | HSP21 (HEAT SHOCK PROTEIN 21)                                        | HSP_21                  |
| CP1B2                 | NGVLFISIPK +                        | Cassava.1282.C1.Contig1455 | AT4G27670.1          | 213            | 1.2e-055 | HSP21 (HEAT SHOCK PROTEIN 21)                                        | HSP_21                  |
| DCP1B2                | QLAVDVSPFGLLDPLSPMR +               | Cassava.1282.C1.Contig1455 | AT4G27670.1          | 213            | 1.2e-055 | HSP21 (HEAT SHOCK PROTEIN 21)                                        | HSP_21                  |
| DCP1B2                | QMMDTMDRIFEDAMTLPGSR +              | Cassava.1282.C1.Contig1455 | AT4G27670.1          | 213            | 1.2e-055 | HSP21 (HEAT SHOCK PROTEIN 21)                                        | HSP_21                  |
| DCP1B2                | VFVEEDVLVIK +                       | Cassava.1282.C1.Contig1455 | AT4G27670.1          | 213            | 1.2e-055 | HSP21 (HEAT SHOCK PROTEIN 21)                                        | HSP_21                  |
| DCP1B2                | ASMENGLVTVTPK-EEVQKPDVK             | scaff_6708_1               | AT4G10250            | 125            | 1e-28    | ATHSP22.0                                                            | HSP_22.0                |
| DCP1B2                | FRLPENANMDQIR                       | scaff_9075_1               | AT4G10250            | 139            | 1.0e-33  | ATHSP22.0                                                            | HSP_22.0                |
| DCP1B2                | IEVEDGRVLQISGER                     | scaff_9075_1               | AT4G10250            | 139            | 1.0e-33  | ATHSP22.0                                                            | HSP_22.0                |
| DCP1B2                | VEIEDGRVLQISGER                     | scaff_6708_1               | AT4G10250.1          | 125            | 1.0e-28  | ATHSP22.0                                                            | HSP_22.0                |
| DCP1B2                | VIDIAEQGSSGQDIK                     | scaff_6708_1               | AT4G10250.1          | 125            | 1.0e-28  | ATHSP22.0                                                            | HSP_22.0                |
| DCP1B2                | ASMENGLVTVTPK-EEVQKPDV              | scaff_9466_1               | AT4G25200.1          | 186            | 1.0e-47  | ATHSP23.6                                                            | HSP_23.6                |
| DCP1B2                | SSMENGLVTVTPK                       | scaff_8927_1               | AT4G25200.1          | 226            | 2.0e-59  | ATHSP23.6-MITO, HSP23.6-MITO, MITOCHONDRION-LOCALIZED                | HSP_23.6                |
| DCP1B2                | ASMENGLVTVTPKKEEVQKPDVK             | CAS011_L20                 | AT1G52560            | 141            | 6.0e-34  | HSP26.5                                                              | HSP_26.5                |
| DCP1B2                | AVFPSIVGRPR                         | scaff_6671_1               | AT3G11500.1          | 150            | 8.0e-37  | Small nuclear ribonucleoprotein family protein                       | snRNP                   |
| DCP1B2                | VLAPYSSEDAR                         | CLF20                      | AT5G50850.1          | 263            | 1.0e-70  | MAB1   Transketolase family protein                                  | MAB1                    |
|                       | QTTGIVGLDVVPNAR                     | scaff_8720_1               | AT4G27670.1          | 210            | 1.0e-54  | NADH                                                                 | NADH                    |
| DCP1B3                | VLAEDAYVVVK                         | CAST051C10                 | AT2G28900.1          | 165            | 2.0e-41  | OEP16                                                                | OEP16                   |
| DCP1B2                | AENLDYLIK +                         | CV01021A2C07.f1 CV01       | AT4G13010.1          | 321            | 3.0e-88  | Oxidoreductase, zinc-binding dehydrogenase family protein            | Oxireductase            |
| DCP1B2                | SLGADEVLDYR +                       | CV01021A2C07.f1 CV01       | AT4G13010.1          | 54             | 2.1e-008 | Oxidoreductase, zinc-binding dehydrogenase family protein            | Oxireductase            |
| DCP1B2                | YIAPEQVPVKYGGLSR                    | CV01023A2D03.f1            | AT1G72150.1          | 168            | 3.9e-042 | PATL1 (PATELLIN 1)                                                   | PATL1                   |
| DCP1B2                | VLPSIGNEVLK                         |                            | AT3G27280.2          |                |          | ATPHB4, PHB4, PROHIBITIN                                             | PHB4                    |
| DCP1B2                | AEVLGLDPR                           | Cassava.661.C1.Contig800   | AT5G09660.1          | 601            | 5.3e-172 | PMDH2 (PEROXISOMAL NAD-MALATE DEHYDROGENASE 2); malate dehydrogenase | PMDH2                   |
| DCP1B2                | LKLIPERGVSEPTEDG                    | Cassava.661.C1.Contig800   | AT5G09660.1          | 601            | 5.3e-172 | PMDH2 (PEROXISOMAL NAD-MALATE DEHYDROGENASE 2); malate dehydrogenase | PMDH2                   |

Table S3. Contd.....

| SDS_PAGE<br>Zone Code | Peptide Sequence<br>(MASCOT Server) | Cassava EST Database | Arabidopsis<br>Locus | Total<br>Score | E_Value | Protein Name                           | Protein<br>Abbreviation |
|-----------------------|-------------------------------------|----------------------|----------------------|----------------|---------|----------------------------------------|-------------------------|
| DCP1B3                | FVFAGPSK                            | m.04.H15.5 MPer183   | AT4G09160.1          | 233            | 5.0e-62 | SEC14 cytosolic factor family protein  | SEC14                   |
| DCP1B2                | IIEVDNR                             | coau0004K06          | AT1G29310.1          | 194            | 3.0e-50 | SecY protein transport family protein  | SecY                    |
| DCP1B3                | GNSVVTVEALEPVRAM                    | CAS008_G02           | AT4G24770.1          | 136            | 3.0e-32 | RBP31                                  | RBP31                   |
| DCP1B1                | VLQLETAAGAAIR                       |                      | AT5G17310.2          |                |         | UDP-glucose pyrophosphorylase 2 (UGP2) | UGP2                    |

Table S4. Supplementary Data: Listing Peptides Sequences (MASCOT Quality) in Non-carotenoid-protein Complex. SDS\_PAGE Picture Shows the Gel Zone Fractionation of Separated Proteins Used for the LC\_MS/MS Analysis

| SDS_PAGE<br>Zone Code | Accession   | Query | Score | Observed | Mr<br>(Expt) | Mr<br>(Calc) | Delta | Miss | Score | Expect | Rank | Peptide Sequence                           |
|-----------------------|-------------|-------|-------|----------|--------------|--------------|-------|------|-------|--------|------|--------------------------------------------|
| M2B2                  | gi 13928270 | 787   | 49.01 | 600.28   | 1198.54      | 1198.55      | -0.01 | 0.00 | 8.08  | 443.28 | 2    | AAAEDTMSLYK +                              |
| M2B7                  | gi 1771261  | 1124  | 564.8 | 707.37   | 1412.73      | 1412.75      | -0.02 | 0.00 | 71.11 | 0.00   | 1    | AAQPSLIADDIATK +                           |
| M2B7                  | gi 120666   | 1151  | 263.1 | 717.87   | 1433.73      | 1433.75      | -0.02 | 0.00 | 22.01 | 32.28  | 1    | AASFNIIPSSTGAAK +                          |
| M2B7                  | gi 74419004 | 1151  | 247.4 | 717.87   | 1433.73      | 1433.75      | -0.02 | 0.00 | 22.01 | 32.28  | 1    | AASFNIIPSSTGAAK +                          |
| M2B7                  | gi 462137   | 1151  | 141   | 717.87   | 1433.73      | 1433.75      | -0.02 | 0.00 | 22.01 | 32.28  | 1    | AASFNIIPSSTGAAK +                          |
| M2B7                  | gi 15228683 | 304   | 191.3 | 499.76   | 997.50       | 997.52       | -0.02 | 0.00 | 42.75 | 0.16   | 1    | AFATYVQAK +                                |
| M2B7                  | gi 629646   | 304   | 190.1 | 499.76   | 997.50       | 997.52       | -0.02 | 0.00 | 42.75 | 0.16   | 1    | AFATYVQAK +                                |
| M2B7                  | gi 13195430 | 304   | 128.3 | 499.76   | 997.50       | 997.52       | -0.02 | 0.00 | 42.75 | 0.16   | 1    | AFATYVQAK +                                |
| M2B7                  | gi 130172   | 304   | 121.3 | 499.76   | 997.50       | 997.52       | -0.02 | 0.00 | 42.75 | 0.16   | 1    | AFATYVQAK +                                |
| M2B7                  | gi 1730557  | 304   | 118.3 | 499.76   | 997.50       | 997.52       | -0.02 | 0.00 | 42.75 | 0.16   | 1    | AFATYVQAK +                                |
| M2B7                  | gi 34305475 | 304   | 101.3 | 499.76   | 997.50       | 997.52       | -0.02 | 0.00 | 42.75 | 0.16   | 1    | AFATYVQAK +                                |
| M2B7                  | gi 120666   | 721   | 263.1 | 581.31   | 1160.60      | 1160.62      | -0.02 | 0.00 | 36.26 | 1.26   | 1    | AGIALNDNFVK +                              |
| M2B7                  | gi 74419004 | 721   | 247.4 | 581.31   | 1160.60      | 1160.62      | -0.02 | 0.00 | 36.26 | 1.26   | 1    | AGIALNDNFVK +                              |
| M2B7                  | gi 120642   | 721   | 100   | 581.31   | 1160.60      | 1160.62      | -0.02 | 0.00 | 36.26 | 1.26   | 1    | AGIALNDNFVK +                              |
| M2B7                  | gi 10120773 | 721   | 99.24 | 581.31   | 1160.60      | 1160.62      | -0.02 | 0.00 | 36.26 | 1.26   | 1    | AGIALNDNFVK +                              |
| M2B4                  | gi 120666   | 722   | 263.1 | 581.80   | 1161.59      | 1161.60      | -0.01 | 0.00 | 61.33 | 0.00   | 1    | AGIALNDNFVK + Deamidation (NQ)             |
| M2B4                  | gi 74419004 | 722   | 247.4 | 581.80   | 1161.59      | 1161.60      | -0.01 | 0.00 | 61.33 | 0.00   | 1    | AGIALNDNFVK + Deamidation (NQ)             |
| M2B4                  | gi 120642   | 722   | 100   | 581.80   | 1161.59      | 1161.60      | -0.01 | 0.00 | 61.33 | 0.00   | 1    | AGIALNDNFVK + Deamidation (NQ)             |
| M2B4                  | gi 10120773 | 722   | 99.24 | 581.80   | 1161.59      | 1161.60      | -0.01 | 0.00 | 61.33 | 0.00   | 1    | AGIALNDNFVK + Deamidation (NQ)             |
| M2B4                  | gi 34099812 | 744   | 192.2 | 588.31   | 1174.62      | 1174.63      | -0.02 | 0.00 | 48.78 | 0.07   | 1    | AGIALNENFVK +                              |
| M2B4                  | gi 48142692 | 722   | 104   | 581.80   | 1161.59      | 1161.60      | -0.01 | 0.00 | 61.33 | 0.00   | 2    | AGIALNNNFVK + 2 Deamidation (NQ)           |
| M2B7                  | gi 48142692 | 721   | 104   | 581.31   | 1160.60      | 1160.62      | -0.02 | 0.00 | 36.26 | 1.26   | 2    | AGIALNNNFVK + Deamidation (NQ)             |
| M2B4                  | gi 56481797 | 1148  | 168.5 | 717.84   | 1433.66      | 1433.68      | -0.02 | 0.00 | 93.50 | 0.00   | 1    | ALDMNTAEDAIVR + Oxidation (M)              |
| M2B4                  | gi 2213867  | 1619  | 115.1 | 704.86   | 2815.42      | 2815.45      | -0.03 | 0.00 | 32.72 | 2.38   | 1    | ALNDHHVLLLEGLTKPNMVTGPSESK + Oxidation (M) |

Table S4. Contd.....

| SDS_PAGE<br>Zone Code | Accession   | Query | Score | Observed | Mr<br>(Expt) | Mr<br>(Calc) | Delta | Miss | Score  | Expect | Ran<br>k | Peptide Sequence                                    |
|-----------------------|-------------|-------|-------|----------|--------------|--------------|-------|------|--------|--------|----------|-----------------------------------------------------|
| M2B1                  | gi 550544   | 583   | 52.17 | 553.30   | 1104.58      | 1104.58      | 0.00  | 0.00 | 52.17  | 0.03   | 1        | AMQLLESGLK + Oxidation (M)                          |
| M2B4                  | gi 77745483 | 181   | 110.8 | 451.25   | 900.49       | 900.50       | -0.01 | 0.00 | 38.24  | 0.77   | 1        | ANSLAQLGK +                                         |
| M2B4                  | gi 15226185 | 181   | 88.55 | 451.25   | 900.49       | 900.50       | -0.01 | 0.00 | 38.24  | 0.77   | 1        | ANSLAQLGK +                                         |
| M2B2                  | gi 68422636 | 769   | 57.52 | 594.82   | 1187.62      | 1187.61      | 0.00  | 1.00 | 57.52  | 0.01   | 1        | AQLNSQEKR + 2 Deamidation (NQ)                      |
| M2B2                  | gi 57106334 | 484   | 81.57 | 533.26   | 1064.50      | 1064.51      | -0.02 | 0.00 | 35.58  | 1.18   | 2        | AQYDELAQK +                                         |
| M2B2                  | gi 74009044 | 484   | 48.38 | 533.26   | 1064.50      | 1064.51      | -0.02 | 0.00 | 35.58  | 1.18   | 2        | AQYDELAQK +                                         |
| M2B3                  | gi 57106334 | 485   | 81.57 | 533.26   | 1064.50      | 1064.51      | -0.02 | 0.00 | 28.78  | 5.63   | 2        | AQYDELAQK +                                         |
| M2B3                  | gi 74009044 | 485   | 48.38 | 533.26   | 1064.50      | 1064.51      | -0.02 | 0.00 | 28.78  | 5.63   | 2        | AQYDELAQK +                                         |
| M2B4                  | gi 57106334 | 483   | 81.57 | 533.25   | 1064.49      | 1064.51      | -0.02 | 0.00 | 21.34  | 29.23  | 2        | AQYDELAQK +                                         |
| M2B4                  | gi 74009044 | 483   | 48.38 | 533.25   | 1064.49      | 1064.51      | -0.02 | 0.00 | 21.34  | 29.23  | 2        | AQYDELAQK +                                         |
| M2B7                  | gi 57335398 | 1087  | 77.82 | 695.84   | 1389.66      | 1389.67      | -0.02 | 0.00 | 31.83  | 3.25   | 2        | ASLENTLAETEGR +                                     |
| M2B1                  | gi 123534   | 1184  | 155.3 | 731.87   | 1461.73      | 1461.74      | -0.01 | 0.00 | 88.19  | 0.00   | 1        | ASMENGVLTVTVPK + Deamidation (NQ); Oxidation (M)    |
| M2B1                  | gi 123534   | 1183  | 155.3 | 731.37   | 1460.73      | 1460.75      | -0.02 | 0.00 | 106.43 | 0.00   | 1        | ASMENGVLTVTVPK + Oxidation (M)                      |
| M2B7                  | gi 6911553  | 1406  | 308.8 | 559.24   | 1674.70      | 1674.72      | -0.03 | 0.00 | 35.89  | 0.35   | 1        | ATAGDTHLGGEDFDNR +                                  |
| M2B7                  | gi 425194   | 1406  | 215.9 | 559.24   | 1674.70      | 1674.72      | -0.03 | 0.00 | 35.89  | 0.35   | 1        | ATAGDTHLGGEDFDNR +                                  |
| M2B7                  | gi 8918240  | 1406  | 145.4 | 559.24   | 1674.70      | 1674.72      | -0.03 | 0.00 | 35.89  | 0.35   | 1        | ATAGDTHLGGEDFDNR +                                  |
| M2B7                  | gi 51012459 | 1406  | 130.8 | 559.24   | 1674.70      | 1674.72      | -0.03 | 0.00 | 35.89  | 0.35   | 1        | ATAGDTHLGGEDFDNR +                                  |
| M2B7                  | gi 17647515 | 1406  | 109.5 | 559.24   | 1674.70      | 1674.72      | -0.03 | 0.00 | 35.89  | 0.35   | 1        | ATAGDTHLGGEDFDNR +                                  |
| M2B4                  | gi 6272285  | 530   | 53.18 | 541.26   | 1080.50      | 1080.51      | -0.01 | 0.00 | 53.18  | 0.02   | 1        | AYSDEIIR +                                          |
| M2B4                  | gi 388261   | 530   | 53.18 | 541.26   | 1080.50      | 1080.51      | -0.01 | 0.00 | 53.18  | 0.02   | 2        | AYSDELIR +                                          |
| M2B4                  | gi 8918240  | 843   | 145.4 | 616.32   | 1230.62      | 1230.64      | -0.02 | 0.00 | 16.75  | 116.50 | 1        | DAGVIAGLNVMR + Oxidation (M)                        |
| M2B7                  | gi 6911553  | 842   | 308.8 | 616.32   | 1230.62      | 1230.64      | -0.02 | 0.00 | 22.89  | 29.45  | 1        | DAGVIAGLNVMR + Oxidation (M)                        |
| M2B7                  | gi 8918240  | 842   | 145.4 | 616.32   | 1230.62      | 1230.64      | -0.02 | 0.00 | 22.89  | 29.45  | 1        | DAGVIAGLNVMR + Oxidation (M)                        |
| M2B4                  | gi 120666   | 945   | 263.1 | 653.32   | 1304.62      | 1304.64      | -0.02 | 0.00 | 51.84  | 0.03   | 1        | DAPMFVVGVNEK +                                      |
| M2B4                  | gi 74419004 | 945   | 247.4 | 653.32   | 1304.62      | 1304.64      | -0.02 | 0.00 | 51.84  | 0.03   | 1        | DAPMFVVGVNEK +                                      |
| M2B4                  | gi 34099812 | 945   | 192.2 | 653.32   | 1304.62      | 1304.64      | -0.02 | 0.00 | 51.84  | 0.03   | 1        | DAPMFVVGVNEK +                                      |
| M2B4                  | gi 120666   | 976   | 263.1 | 661.32   | 1320.62      | 1320.64      | -0.02 | 0.00 | 82.70  | 0.00   | 1        | DAPMFVVGVNEK + Oxidation (M)                        |
| M2B4                  | gi 74419004 | 976   | 247.4 | 661.32   | 1320.62      | 1320.64      | -0.02 | 0.00 | 82.70  | 0.00   | 1        | DAPMFVVGVNEK + Oxidation (M)                        |
| M2B4                  | gi 34099812 | 976   | 192.2 | 661.32   | 1320.62      | 1320.64      | -0.02 | 0.00 | 82.70  | 0.00   | 1        | DAPMFVVGVNEK + Oxidation (M)                        |
| M2B7                  | gi 15228683 | 1128  | 191.3 | 708.31   | 1414.60      | 1414.61      | 0.00  | 0.00 | 31.36  | 1.43   | 1        | DFPSYIECQEK + Carbamidomethyl (C)                   |
| M2B7                  | gi 13195430 | 1128  | 128.3 | 708.31   | 1414.60      | 1414.61      | 0.00  | 0.00 | 31.36  | 1.43   | 1        | DFPSYIECQEK + Carbamidomethyl (C)                   |
| M2B7                  | gi 130172   | 1128  | 121.3 | 708.31   | 1414.60      | 1414.61      | 0.00  | 0.00 | 31.36  | 1.43   | 1        | DFPSYIECQEK + Carbamidomethyl (C)                   |
| M2B7                  | gi 34305475 | 1128  | 101.3 | 708.31   | 1414.60      | 1414.61      | 0.00  | 0.00 | 31.16  | 1.49   | 2        | DFPSYIECQQK + Carbamidomethyl (C); Deamidation (NQ) |
| M2B4                  | gi 77745483 | 278   | 110.8 | 492.77   | 983.52       | 983.53       | -0.01 | 0.00 | 30.22  | 2.37   | 1        | DQNIVPGIK + Deamidation (NQ)                        |
| M2B1                  | gi 50420223 | 460   | 47.84 | 530.77   | 1059.52      | 1059.54      | -0.02 | 1.00 | 47.84  | 0.09   | 1        | DVLDLNKNK + 2 Deamidation (NQ)                      |

Table S4. Contd.....

| SDS_PAGE<br>Zone Code | Accession    | Query | Score | Observed | Mr<br>(Expt) | Mr<br>(Calc) | Delta | Miss | Score | Expect | Rank | Peptide Sequence                |
|-----------------------|--------------|-------|-------|----------|--------------|--------------|-------|------|-------|--------|------|---------------------------------|
| M2B7                  | gi 50420223  | 462   | 47.84 | 530.77   | 1059.53      | 1059.54      | -0.01 | 1.00 | 39.91 | 0.59   | 1    | DVLDLNKKNK + 2 Deamidation (NQ) |
| M2B7                  | gi 130172    | 347   | 121.3 | 509.25   | 1016.49      | 1016.50      | -0.01 | 0.00 | 20.43 | 36.47  | 2    | EAWNITQR +                      |
| M2B7                  | gi 33326375  | 977   | 157.3 | 662.30   | 1322.59      | 1322.60      | 0.00  | 0.00 | 13.81 | 138.08 | 2    | EDQLEYLEER +                    |
| M2B7                  | gi 1708314   | 977   | 133.2 | 662.30   | 1322.59      | 1322.60      | 0.00  | 0.00 | 13.81 | 138.08 | 2    | EDQLEYLEER +                    |
| M2B2                  | gi 6984140   | 313   | 90.02 | 500.78   | 999.55       | 999.56       | -0.01 | 0.00 | 57.23 | 0.01   | 1    | EEAVQLALK +                     |
| M2B1                  | gi 40646966  | 942   | 73.65 | 651.82   | 1301.62      | 1301.65      | -0.02 | 1.00 | 44.52 | 0.17   | 2    | EEVKVQVEEGR + Deamidation (NQ)  |
| M2B7                  | gi 1771261   | 470   | 564.8 | 531.26   | 1060.50      | 1060.52      | -0.02 | 0.00 | 34.96 | 1.36   | 1    | EFADDVLPR +                     |
| M2B7                  | gi 1771261   | 471   | 564.8 | 531.26   | 1060.50      | 1060.52      | -0.02 | 0.00 | 45.76 | 0.12   | 1    | EFADDVLPR +                     |
| M2B7                  | gi 109715750 | 470   | 176.3 | 531.26   | 1060.50      | 1060.52      | -0.02 | 0.00 | 34.96 | 1.36   | 1    | EFADDVLPR +                     |
| M2B7                  | gi 109715750 | 471   | 176.3 | 531.26   | 1060.50      | 1060.52      | -0.02 | 0.00 | 45.76 | 0.12   | 1    | EFADDVLPR +                     |
| M2B7                  | gi 76496236  | 470   | 79.87 | 531.26   | 1060.50      | 1060.52      | -0.02 | 0.00 | 34.96 | 1.36   | 2    | EFADNVLPR + Deamidation (NQ)    |
| M2B7                  | gi 76496236  | 471   | 79.87 | 531.26   | 1060.50      | 1060.52      | -0.02 | 0.00 | 45.76 | 0.12   | 2    | EFADNVLPR + Deamidation (NQ)    |
| M2B7                  | gi 4586236   | 470   | 66.73 | 531.26   | 1060.50      | 1060.52      | -0.02 | 0.00 | 34.96 | 1.36   | 2    | EFADNVLPR + Deamidation (NQ)    |
| M2B7                  | gi 4586236   | 471   | 66.73 | 531.26   | 1060.50      | 1060.52      | -0.02 | 0.00 | 45.76 | 0.12   | 2    | EFADNVLPR + Deamidation (NQ)    |
| M2B4                  | gi 10334493  | 348   | 45.07 | 509.26   | 1016.50      | 1016.52      | -0.01 | 0.00 | 45.07 | 0.14   | 1    | EFAPSIPEK +                     |
| M2B4                  | gi 113621    | 131   | 77.41 | 435.25   | 868.48       | 868.50       | -0.02 | 0.00 | 49.14 | 0.02   | 1    | EGGVLPGIK +                     |
| M2B4                  | gi 786178    | 131   | 58.08 | 435.25   | 868.48       | 868.50       | -0.02 | 0.00 | 49.14 | 0.02   | 1    | EGGVLPGIK +                     |
| M2B4                  | gi 33326375  | 902   | 157.3 | 638.32   | 1274.63      | 1274.64      | 0.00  | 0.00 | 80.77 | 0.00   | 1    | EIISNASDALDK +                  |
| M2B4                  | gi 21536853  | 1086  | 272.4 | 694.87   | 1387.72      | 1387.73      | -0.01 | 0.00 | 73.14 | 0.00   | 1    | ELDYLVGAVANPK +                 |
| M2B4                  | gi 115469436 | 1086  | 191.5 | 694.87   | 1387.72      | 1387.73      | -0.01 | 0.00 | 73.14 | 0.00   | 1    | ELDYLVGAVANPK +                 |
| M2B4                  | gi 23100613  | 902   | 98.66 | 638.32   | 1274.63      | 1274.64      | 0.00  | 0.00 | 80.77 | 0.00   | 2    | ELISNASDAIDK +                  |
| M2B7                  | gi 111063883 | 631   | 67.42 | 561.78   | 1121.55      | 1121.56      | -0.01 | 0.00 | 33.11 | 2.17   | 1    | ELQQIAQYK + 2 Deamidation (NQ)  |
| M2B1                  | gi 3582434   | 494   | 77.93 | 536.27   | 1070.53      | 1070.54      | -0.01 | 0.00 | 29.02 | 4.18   | 2    | ETPEAHIFK +                     |
| M2B1                  | gi 40646966  | 494   | 73.65 | 536.27   | 1070.53      | 1070.54      | -0.01 | 0.00 | 29.13 | 4.08   | 1    | ETPQAHIFK + Deamidation (NQ)    |
| M2B3                  | gi 47212110  | 79    | 84.1  | 414.21   | 826.42       | 826.42       | -0.01 | 0.00 | 52.09 | 0.01   | 1    | FASFIDK +                       |
| M2B3                  | gi 47604942  | 79    | 78.73 | 414.21   | 826.42       | 826.42       | -0.01 | 0.00 | 52.09 | 0.01   | 1    | FASFIDK +                       |
| M2B4                  | gi 115496454 | 78    | 113.8 | 414.21   | 826.41       | 826.42       | -0.01 | 0.00 | 13.85 | 107.58 | 2    | FASFIDK +                       |
| M2B4                  | gi 47212110  | 78    | 84.1  | 414.21   | 826.41       | 826.42       | -0.01 | 0.00 | 13.85 | 107.58 | 2    | FASFIDK +                       |
| M2B7                  | gi 116004057 | 77    | 153.5 | 414.21   | 826.41       | 826.42       | -0.01 | 0.00 | 37.29 | 0.47   | 1    | FASFIDK +                       |
| M2B7                  | gi 6980088   | 77    | 134.2 | 414.21   | 826.41       | 826.42       | -0.01 | 0.00 | 37.29 | 0.47   | 1    | FASFIDK +                       |
| M2B7                  | gi 47212110  | 77    | 84.1  | 414.21   | 826.41       | 826.42       | -0.01 | 0.00 | 37.29 | 0.47   | 1    | FASFIDK +                       |
| M2B3                  | gi 109071958 | 79    | 67.73 | 414.21   | 826.42       | 826.42       | -0.01 | 0.00 | 52.09 | 0.01   | 2    | FASFINK + Deamidation (NQ)      |
| M2B7                  | gi 109071958 | 77    | 67.73 | 414.21   | 826.41       | 826.42       | -0.01 | 0.00 | 37.29 | 0.47   | 2    | FASFINK + Deamidation (NQ)      |
| M2B4                  | gi 629646    | 272   | 190.1 | 490.72   | 979.43       | 979.44       | -0.01 | 0.00 | 30.95 | 2.00   | 1    | FCNPDLISK + Carbamidomethyl (C) |
| M2B4                  | gi 92887207  | 957   | 160.3 | 655.82   | 1309.63      | 1309.63      | -0.01 | 0.00 | 26.87 | 9.62   | 1    | FDMGGSAAVLGAAK + Oxidation (M)  |
| M2B1                  | gi 15234240  | 189   | 56.44 | 455.71   | 909.41       | 909.43       | -0.01 | 0.00 | 26.41 | 6.32   | 1    | FDMPGLSK + Oxidation (M)        |

Table S4. Contd.....

| SDS_PAGE<br>Zone Code | Accession    | Query | Score | Observed | Mr<br>(Expt) | Mr<br>(Calc) | Delta | Miss | Score | Expect | Rank | Peptide Sequence                             |
|-----------------------|--------------|-------|-------|----------|--------------|--------------|-------|------|-------|--------|------|----------------------------------------------|
| M2B7                  | gi 6911553   | 990   | 308.8 | 665.30   | 1328.59      | 1328.61      | -0.01 | 0.00 | 10.04 | 268.97 | 1    | FEELNMDLFR + Oxidation (M)                   |
| M2B7                  | gi 425194    | 990   | 215.9 | 665.30   | 1328.59      | 1328.61      | -0.01 | 0.00 | 10.04 | 268.97 | 1    | FEELNMDLFR + Oxidation (M)                   |
| M2B7                  | gi 116504654 | 990   | 104.9 | 665.30   | 1328.59      | 1328.61      | -0.01 | 0.00 | 10.04 | 268.97 | 1    | FEELNMDLFR + Oxidation (M)                   |
| M2B4                  | gi 4733946   | 289   | 208.4 | 496.26   | 990.51       | 990.51       | -0.01 | 0.00 | 25.55 | 14.35  | 1    | FQEIGLER +                                   |
| M2B4                  | gi 13160142  | 289   | 191.4 | 496.26   | 990.51       | 990.51       | -0.01 | 0.00 | 25.55 | 14.35  | 1    | FQEIGLER +                                   |
| M2B4                  | gi 22331535  | 289   | 182.9 | 496.26   | 990.51       | 990.51       | -0.01 | 0.00 | 25.55 | 14.35  | 1    | FQEIGLER +                                   |
| M2B4                  | gi 80973758  | 289   | 177   | 496.26   | 990.51       | 990.51       | -0.01 | 0.00 | 25.55 | 14.35  | 1    | FQEIGLER +                                   |
| M2B4                  | gi 37790792  | 289   | 159.4 | 496.26   | 990.51       | 990.51       | -0.01 | 0.00 | 25.55 | 14.35  | 1    | FQEIGLER +                                   |
| M2B7                  | gi 4733946   | 288   | 208.4 | 496.26   | 990.50       | 990.51       | -0.01 | 0.00 | 37.05 | 0.96   | 1    | FQEIGLER +                                   |
| M2B7                  | gi 13160142  | 288   | 191.4 | 496.26   | 990.50       | 990.51       | -0.01 | 0.00 | 37.05 | 0.96   | 1    | FQEIGLER +                                   |
| M2B7                  | gi 22331535  | 288   | 182.9 | 496.26   | 990.50       | 990.51       | -0.01 | 0.00 | 37.05 | 0.96   | 1    | FQEIGLER +                                   |
| M2B7                  | gi 80973758  | 288   | 177   | 496.26   | 990.50       | 990.51       | -0.01 | 0.00 | 37.05 | 0.96   | 1    | FQEIGLER +                                   |
| M2B7                  | gi 37790792  | 288   | 159.4 | 496.26   | 990.50       | 990.51       | -0.01 | 0.00 | 37.05 | 0.96   | 1    | FQEIGLER +                                   |
| M2B7                  | gi 6056373   | 169   | 51.05 | 445.75   | 889.49       | 889.50       | -0.01 | 0.00 | 32.53 | 1.92   | 1    | FSVSPVVR +                                   |
| M2B7                  | gi 1705587   | 128   | 121.2 | 430.72   | 859.42       | 859.42       | -0.01 | 0.00 | 28.53 | 5.69   | 1    | FVEYFR +                                     |
| M2B7                  | gi 92874670  | 128   | 62.93 | 430.72   | 859.42       | 859.42       | -0.01 | 0.00 | 28.53 | 5.69   | 1    | FVEYFR +                                     |
| M2B4                  | gi 1100223   | 1064  | 68.36 | 686.35   | 1370.69      | 1370.72      | -0.02 | 0.00 | 16.96 | 89.02  | 1    | GAGQNIIPSSTGAAK +                            |
| M2B4                  | gi 87303442  | 1064  | 55.64 | 686.35   | 1370.69      | 1370.72      | -0.02 | 0.00 | 16.96 | 89.02  | 1    | GAGQNIIPSSTGAAK +                            |
| M2B3                  | gi 62526587  | 204   | 227.5 | 459.24   | 916.46       | 916.46       | 0.00  | 0.00 | 25.66 | 13.30  | 2    | GCAPMLR + Carbamidomethyl (C)                |
| M2B7                  | gi 6056373   | 241   | 51.05 | 478.26   | 954.51       | 954.52       | -0.02 | 0.00 | 18.52 | 39.74  | 1    | GGGQVIPTAR +                                 |
| M2B4                  | gi 115434198 | 1170  | 176.5 | 724.85   | 1447.68      | 1447.70      | -0.01 | 0.00 | 51.08 | 0.04   | 1    | GILAIKSNATCGK + Carbamidomethyl (C)          |
| M2B4                  | gi 15226185  | 1170  | 88.55 | 724.85   | 1447.68      | 1447.70      | -0.01 | 0.00 | 51.08 | 0.04   | 1    | GILAIKSNATCGK + Carbamidomethyl (C)          |
| M2B4                  | gi 6911142   | 848   | 51.55 | 616.80   | 1231.59      | 1231.58      | 0.01  | 1.00 | 25.29 | 14.11  | 2    | GSGGGGGGGFRGPR +                             |
| M2B7                  | gi 6911142   | 846   | 51.55 | 616.79   | 1231.57      | 1231.58      | -0.01 | 1.00 | 51.55 | 0.03   | 2    | GSGGGGGGGFRGPR +                             |
| M2B4                  | gi 113624    | 1572  | 63.32 | 764.03   | 2289.08      | 2289.11      | -0.03 | 0.00 | 63.32 | 0.00   | 1    | GTVELAGTNGETTQGLDGLAQR +<br>Deamidation (NQ) |
| M2B4                  | gi 21536853  | 1321  | 272.4 | 787.41   | 1572.81      | 1572.84      | -0.03 | 0.00 | 73.68 | 0.00   | 1    | GVTTIIGGGDSVAAVEK +                          |
| M2B4                  | gi 115469436 | 1321  | 191.5 | 787.41   | 1572.81      | 1572.84      | -0.03 | 0.00 | 73.68 | 0.00   | 1    | GVTTIIGGGDSVAAVEK +                          |
| M2B4                  | gi 1022805   | 1321  | 86.85 | 787.41   | 1572.81      | 1572.84      | -0.03 | 0.00 | 73.68 | 0.00   | 1    | GVTTIIGGGDSVAAVEK +                          |
| M2B7                  | gi 21536853  | 1322  | 272.4 | 787.42   | 1572.82      | 1572.84      | -0.02 | 0.00 | 46.21 | 0.12   | 1    | GVTTIIGGGDSVAAVEK +                          |
| M2B7                  | gi 115469436 | 1322  | 191.5 | 787.42   | 1572.82      | 1572.84      | -0.02 | 0.00 | 46.21 | 0.12   | 1    | GVTTIIGGGDSVAAVEK +                          |
| M2B7                  | gi 1022805   | 1322  | 86.85 | 787.42   | 1572.82      | 1572.84      | -0.02 | 0.00 | 46.21 | 0.12   | 1    | GVTTIIGGGDSVAAVEK +                          |
| M2B3                  | gi 62526587  | 1489  | 227.5 | 615.30   | 1842.87      | 1842.91      | -0.03 | 0.00 | 19.37 | 60.07  | 1    | HAAEQGHAANGLDIK +                            |
| M2B4                  | gi 62526587  | 1488  | 227.5 | 615.30   | 1842.87      | 1842.91      | -0.04 | 0.00 | 32.96 | 2.62   | 1    | HAAEQGHAANGLDIK +                            |

Table S4. Contd.....

| SDS_PAGE<br>Zone Code | Accession    | Query | Score | Observed | Mr<br>(Expt) | Mr<br>(Calc) | Delta | Miss | Score | Expect | Ran<br>k | Peptide Sequence                             |
|-----------------------|--------------|-------|-------|----------|--------------|--------------|-------|------|-------|--------|----------|----------------------------------------------|
| M2B3                  | gi 62526587  | 1493  | 227.5 | 615.64   | 1843.88      | 1843.89      | -0.01 | 0.00 | 43.98 | 0.21   | 1        | HAAEQGHAANNGLDIAVR +<br>Deamidation (NQ)     |
| M2B2                  | gi 2511588   | 693   | 61.2  | 578.80   | 1155.59      | 1155.60      | -0.02 | 0.00 | 61.20 | 0.00   | 1        | HITIFSPEGR +                                 |
| M2B1                  | gi 83649448  | 56    | 45.99 | 404.20   | 806.38       | 806.39       | -0.01 | 0.00 | 27.59 | 7.04   | 1        | IAADDFR +                                    |
| M2B3                  | gi 83649448  | 57    | 45.99 | 404.20   | 806.39       | 806.39       | 0.00  | 0.00 | 37.61 | 0.75   | 1        | IAADDFR +                                    |
| M2B4                  | gi 83649448  | 55    | 45.99 | 404.20   | 806.38       | 806.39       | -0.01 | 0.00 | 45.99 | 0.11   | 1        | IAADDFR +                                    |
| M2B1                  | gi 29839257  | 557   | 65.8  | 546.80   | 1091.58      | 1091.60      | -0.02 | 0.00 | 65.80 | 0.00   | 1        | IAEYVTQLR +                                  |
| M2B2                  | gi 29839257  | 556   | 65.8  | 546.80   | 1091.58      | 1091.60      | -0.02 | 0.00 | 57.60 | 0.01   | 1        | IAEYVTQLR +                                  |
| M2B3                  | gi 62526587  | 1028  | 227.5 | 449.89   | 1346.65      | 1346.66      | -0.01 | 0.00 | 43.14 | 0.27   | 1        | IAWHSAGTYDVK +                               |
| M2B1                  | gi 1173201   | 1164  | 58.74 | 722.38   | 1442.74      | 1442.73      | 0.01  | 0.00 | 58.74 | 0.01   | 1        | IEDVTPIPTDSTR +                              |
| M2B3                  | gi 13539964  | 365   | 70.39 | 513.30   | 1024.59      | 1024.60      | -0.02 | 0.00 | 61.39 | 0.00   | 2        | IGGIGTVPVGR +                                |
| M2B4                  | gi 13539964  | 366   | 70.39 | 513.30   | 1024.59      | 1024.60      | -0.02 | 0.00 | 54.47 | 0.01   | 2        | IGGIGTVPVGR +                                |
| M2B4                  | gi 111053717 | 366   | 65.88 | 513.30   | 1024.59      | 1024.60      | -0.02 | 0.00 | 54.47 | 0.01   | 1        | IGGIGTVPVGR +                                |
| M2B4                  | gi 3410705   | 366   | 65.83 | 513.30   | 1024.59      | 1024.60      | -0.02 | 0.00 | 54.47 | 0.01   | 1        | IGGIGTVPVGR +                                |
| M2B4                  | gi 58615198  | 366   | 65.83 | 513.30   | 1024.59      | 1024.60      | -0.02 | 0.00 | 54.47 | 0.01   | 1        | IGGIGTVPVGR +                                |
| M2B4                  | gi 56377850  | 366   | 65.31 | 513.30   | 1024.59      | 1024.60      | -0.02 | 0.00 | 54.47 | 0.01   | 1        | IGGIGTVPVGR +                                |
| M2B3                  | gi 120666    | 90    | 263.1 | 417.23   | 832.44       | 832.46       | -0.01 | 0.00 | 42.70 | 0.24   | 1        | IGINGFGR +                                   |
| M2B3                  | gi 74419004  | 90    | 247.4 | 417.23   | 832.44       | 832.46       | -0.01 | 0.00 | 42.70 | 0.24   | 1        | IGINGFGR +                                   |
| M2B3                  | gi 462137    | 90    | 141   | 417.23   | 832.44       | 832.46       | -0.01 | 0.00 | 42.70 | 0.24   | 1        | IGINGFGR +                                   |
| M2B3                  | gi 48142692  | 90    | 104   | 417.23   | 832.44       | 832.46       | -0.01 | 0.00 | 42.70 | 0.24   | 1        | IGINGFGR +                                   |
| M2B3                  | gi 118351869 | 90    | 97.06 | 417.23   | 832.44       | 832.46       | -0.01 | 0.00 | 42.70 | 0.24   | 1        | IGINGFGR +                                   |
| M2B3                  | gi 15602789  | 90    | 81.38 | 417.23   | 832.44       | 832.46       | -0.01 | 0.00 | 42.70 | 0.24   | 1        | IGINGFGR +                                   |
| M2B3                  | gi 21672565  | 90    | 81.38 | 417.23   | 832.44       | 832.46       | -0.01 | 0.00 | 42.70 | 0.24   | 1        | IGINGFGR +                                   |
| M2B3                  | gi 30248344  | 90    | 81.38 | 417.23   | 832.44       | 832.46       | -0.01 | 0.00 | 42.70 | 0.24   | 1        | IGINGFGR +                                   |
| M2B3                  | gi 1100223   | 90    | 68.36 | 417.23   | 832.44       | 832.46       | -0.01 | 0.00 | 42.70 | 0.24   | 1        | IGINGFGR +                                   |
| M2B3                  | gi 3023812   | 90    | 67.27 | 417.23   | 832.44       | 832.46       | -0.01 | 0.00 | 42.70 | 0.24   | 1        | IGINGFGR +                                   |
| M2B3                  | gi 113476798 | 90    | 63.54 | 417.23   | 832.44       | 832.46       | -0.01 | 0.00 | 42.70 | 0.24   | 1        | IGINGFGR +                                   |
| M2B4                  | gi 113621    | 1539  | 77.41 | 1040.02  | 2078.03      | 2078.06      | -0.03 | 0.00 | 28.27 | 8.09   | 1        | IGPNEPSQLAIDLNAQGLAR + 2<br>Deamidation (NQ) |
| M2B7                  | gi 21672507  | 1191  | 46.21 | 735.40   | 1468.78      | 1468.80      | -0.02 | 0.00 | 46.21 | 0.08   | 1        | IHNITNQGLIFAK + Deamidation (NQ)             |
| M2B4                  | gi 429116    | 1471  | 96.93 | 596.66   | 1786.95      | 1786.98      | -0.03 | 1.00 | 9.58  | 573.69 | 1        | IINEPTAAAIAYGIDKK +                          |
| M2B7                  | gi 429116    | 1470  | 96.93 | 596.66   | 1786.95      | 1786.98      | -0.03 | 1.00 | 96.93 | 0.00   | 1        | IINEPTAAAIAYGIDKK +                          |
| M2B4                  | gi 425194    | 1471  | 215.9 | 596.66   | 1786.95      | 1786.98      | -0.03 | 1.00 | 9.58  | 573.69 | 2        | IINEPTAAAIAYGLDKK +                          |
| M2B4                  | gi 50259091  | 1471  | 193.5 | 596.66   | 1786.95      | 1786.98      | -0.03 | 1.00 | 9.58  | 573.69 | 2        | IINEPTAAAIAYGLDKK +                          |
| M2B4                  | gi 3114993   | 1471  | 174   | 596.66   | 1786.95      | 1786.98      | -0.03 | 1.00 | 9.58  | 573.69 | 2        | IINEPTAAAIAYGLDKK +                          |
| M2B4                  | gi 112819494 | 1471  | 142.6 | 596.66   | 1786.95      | 1786.98      | -0.03 | 1.00 | 9.58  | 573.69 | 2        | IINEPTAAAIAYGLDKK +                          |
| M2B7                  | gi 6911553   | 1470  | 308.8 | 596.66   | 1786.95      | 1786.98      | -0.03 | 1.00 | 96.93 | 0.00   | 2        | IINEPTAAAIAYGLDKK +                          |

Table S4. Contd.....

| SDS_PAGE<br>Zone Code | Accession    | Query | Score | Observed | Mr<br>(Expt) | Mr<br>(Calc) | Delta | Miss | Score | Expect | Rank | Peptide Sequence                                                          |
|-----------------------|--------------|-------|-------|----------|--------------|--------------|-------|------|-------|--------|------|---------------------------------------------------------------------------|
| M2B7                  | gi 425194    | 1470  | 215.9 | 596.66   | 1786.95      | 1786.98      | -0.03 | 1.00 | 96.93 | 0.00   | 2    | IINEPTAAAIA YGLDKK +                                                      |
| M2B7                  | gi 3114993   | 1470  | 174   | 596.66   | 1786.95      | 1786.98      | -0.03 | 1.00 | 96.93 | 0.00   | 2    | IINEPTAAAIA YGLDKK +                                                      |
| M2B7                  | gi 112819494 | 1470  | 142.6 | 596.66   | 1786.95      | 1786.98      | -0.03 | 1.00 | 96.93 | 0.00   | 2    | IINEPTAAAIA YGLDKK +                                                      |
| M2B7                  | gi 249262    | 1447  | 78.52 | 877.91   | 1753.81      | 1753.83      | -0.02 | 0.00 | 78.52 | 0.00   | 1    | ILDGNSGDVAVDFYNR +                                                        |
| M2B4                  | gi 20599     | 248   | 162.6 | 481.77   | 961.52       | 961.53       | -0.02 | 0.00 | 59.51 | 0.00   | 1    | INLGVGAYR +                                                               |
| M2B4                  | gi 13516907  | 1426  | 82.87 | 570.28   | 1707.83      | 1707.86      | -0.03 | 1.00 | 47.58 | 0.10   | 1    | INTYAEFRDDVLPR +                                                          |
| M2B7                  | gi 13516907  | 1427  | 82.87 | 570.28   | 1707.83      | 1707.86      | -0.03 | 1.00 | 60.61 | 0.00   | 1    | INTYAEFRDDVLPR +                                                          |
| M2B7                  | gi 1771261   | 1427  | 564.8 | 570.28   | 1707.83      | 1707.86      | -0.03 | 1.00 | 60.61 | 0.00   | 2    | INTYREFADDVLPR +                                                          |
| M2B7                  | gi 92872649  | 668   | 71.82 | 571.82   | 1141.63      | 1141.65      | -0.02 | 0.00 | 39.88 | 0.34   | 1    | ISANIAANVAAK +                                                            |
| M2B3                  | gi 15792899  | 523   | 50.61 | 539.79   | 1077.56      | 1077.58      | -0.02 | 0.00 | 50.61 | 0.04   | 2    | ISEYGLQLR +                                                               |
| M2B4                  | gi 15792899  | 524   | 50.61 | 539.80   | 1077.58      | 1077.58      | -0.01 | 0.00 | 32.61 | 2.45   | 2    | ISEYGLQLR +                                                               |
| M2B3                  | gi 21027     | 523   | 66.56 | 539.79   | 1077.56      | 1077.58      | -0.02 | 0.00 | 66.56 | 0.00   | 1    | ISEYVAQLR +                                                               |
| M2B4                  | gi 21027     | 524   | 66.56 | 539.80   | 1077.58      | 1077.58      | -0.01 | 0.00 | 49.00 | 0.06   | 1    | ISEYVAQLR +                                                               |
| M2B4                  | gi 50256615  | 1611  | 61.38 | 680.81   | 2719.23      | 2719.21      | 0.02  | 1.00 | 22.70 | 23.92  | 1    | KDYDSSMSVVSNASCTTNCLAPLAK<br>+ 2 Carbamidomethyl (C); Deamidation<br>(NQ) |
| M2B4                  | gi 7288201   | 511   | 48.83 | 537.80   | 1073.59      | 1073.59      | 0.00  | 0.00 | 48.83 | 0.06   | 1    | KPMAAIVGGSK + Oxidation (M)                                               |
| M2B1                  | gi 1168193   | 1389  | 52.24 | 549.93   | 1646.76      | 1646.77      | -0.01 | 1.00 | 12.08 | 274.97 | 1    | KVTEQGQELSNEER + Deamidation<br>(NQ)                                      |
| M2B4                  | gi 74419004  | 214   | 247.4 | 464.79   | 927.58       | 927.58       | 0.00  | 1.00 | 38.68 | 0.16   | 2    | KVVISAPSK +                                                               |
| M2B4                  | gi 34099812  | 214   | 192.2 | 464.79   | 927.58       | 927.58       | 0.00  | 1.00 | 38.68 | 0.16   | 2    | KVVISAPSK +                                                               |
| M2B4                  | gi 86130515  | 214   | 81.38 | 464.79   | 927.58       | 927.58       | 0.00  | 1.00 | 38.68 | 0.16   | 2    | KVVISAPSK +                                                               |
| M2B4                  | gi 50256615  | 214   | 61.38 | 464.79   | 927.58       | 927.58       | 0.00  | 1.00 | 38.68 | 0.16   | 2    | KVVISAPSK +                                                               |
| M2B1                  | gi 119912330 | 56    | 117.7 | 404.20   | 806.38       | 806.39       | -0.01 | 0.00 | 27.59 | 7.04   | 2    | LAADDFR +                                                                 |
| M2B1                  | gi 12852628  | 56    | 117.6 | 404.20   | 806.38       | 806.39       | -0.01 | 0.00 | 27.59 | 7.04   | 2    | LAADDFR +                                                                 |
| M2B1                  | gi 57106334  | 56    | 81.57 | 404.20   | 806.38       | 806.39       | -0.01 | 0.00 | 27.59 | 7.04   | 2    | LAADDFR +                                                                 |
| M2B1                  | gi 57335398  | 56    | 77.82 | 404.20   | 806.38       | 806.39       | -0.01 | 0.00 | 27.59 | 7.04   | 2    | LAADDFR +                                                                 |
| M2B1                  | gi 29335504  | 56    | 60.4  | 404.20   | 806.38       | 806.39       | -0.01 | 0.00 | 27.59 | 7.04   | 2    | LAADDFR +                                                                 |
| M2B4                  | gi 119912330 | 55    | 117.7 | 404.20   | 806.38       | 806.39       | -0.01 | 0.00 | 45.99 | 0.11   | 2    | LAADDFR +                                                                 |
| M2B4                  | gi 12852628  | 55    | 117.6 | 404.20   | 806.38       | 806.39       | -0.01 | 0.00 | 45.99 | 0.11   | 2    | LAADDFR +                                                                 |
| M2B4                  | gi 57106334  | 55    | 81.57 | 404.20   | 806.38       | 806.39       | -0.01 | 0.00 | 45.99 | 0.11   | 2    | LAADDFR +                                                                 |
| M2B4                  | gi 57335398  | 55    | 77.82 | 404.20   | 806.38       | 806.39       | -0.01 | 0.00 | 45.99 | 0.11   | 2    | LAADDFR +                                                                 |
| M2B4                  | gi 29335504  | 55    | 60.4  | 404.20   | 806.38       | 806.39       | -0.01 | 0.00 | 45.99 | 0.11   | 2    | LAADDFR +                                                                 |
| M2B7                  | gi 92874670  | 911   | 62.93 | 641.35   | 1280.69      | 1280.71      | -0.02 | 0.00 | 34.40 | 1.04   | 1    | LADLEAAPAAIAR +                                                           |
| M2B7                  | gi 1705587   | 911   | 121.2 | 641.35   | 1280.69      | 1280.71      | -0.02 | 0.00 | 34.40 | 1.04   | 2    | LADLEAAPAALAR +                                                           |
| M2B7                  | gi 1771261   | 1415  | 564.8 | 564.96   | 1691.86      | 1691.90      | -0.03 | 1.00 | 34.11 | 2.00   | 1    | LAMAIPDKWIDYLYK + Oxidation (M)                                           |
| M2B7                  | gi 76496236  | 1415  | 79.87 | 564.96   | 1691.86      | 1691.90      | -0.03 | 1.00 | 34.11 | 2.00   | 1    | LAMAIPDKWIDYLYK + Oxidation (M)                                           |



Table S4. Contd.....

| SDS_PAGE<br>Zone Code | Accession    | Query | Score | Observed | Mr<br>(Expt) | Mr<br>(Calc) | Delta | Miss | Score | Expect | Rank | Peptide Sequence                                          |
|-----------------------|--------------|-------|-------|----------|--------------|--------------|-------|------|-------|--------|------|-----------------------------------------------------------|
| M2B4                  | gi 115434198 | 1109  | 176.5 | 701.36   | 1400.71      | 1400.73      | -0.02 | 0.00 | 83.08 | 0.00   | 1    | LASIGLDNTEVNR +                                           |
| M2B3                  | gi 62122767  | 60    | 86.25 | 405.22   | 808.43       | 808.43       | -0.01 | 0.00 | 37.10 | 0.47   | 2    | LASYLDK +                                                 |
| M2B7                  | gi 54873534  | 1221  | 53.29 | 747.92   | 1493.83      | 1493.86      | -0.03 | 0.00 | 18.05 | 27.10  | 1    | LATIPITGTGINPAR +                                         |
| M2B7                  | gi 1705587   | 677   | 121.2 | 574.79   | 1147.57      | 1147.59      | -0.02 | 0.00 | 58.31 | 0.01   | 1    | LATPELEYGR +                                              |
| M2B3                  | gi 2754860   | 1028  | 68.8  | 449.89   | 1346.65      | 1346.66      | -0.01 | 0.00 | 43.14 | 0.27   | 2    | LAWHSAGTYDVK +                                            |
| M2B3                  | gi 74483945  | 1028  | 68.8  | 449.89   | 1346.65      | 1346.66      | -0.01 | 0.00 | 43.14 | 0.27   | 2    | LAWHSAGTYDVK +                                            |
| M2B7                  | gi 33326375  | 792   | 157.3 | 601.32   | 1200.63      | 1200.65      | -0.02 | 0.00 | 31.61 | 3.16   | 1    | LDAQPELFIR +                                              |
| M2B7                  | gi 1708314   | 792   | 133.2 | 601.32   | 1200.63      | 1200.65      | -0.02 | 0.00 | 31.61 | 3.16   | 1    | LDAQPELFIR +                                              |
| M2B7                  | gi 1771261   | 1485  | 564.8 | 917.44   | 1832.86      | 1832.88      | -0.02 | 0.00 | 11.70 | 349.43 | 1    | LGDFEGINETSPADAVAK +                                      |
| M2B4                  | gi 136429    | 1554  | 176.5 | 737.70   | 2210.08      | 2210.10      | -0.01 | 0.00 | 38.58 | 0.74   | 1    | LGEHNIDVLEGNEQFINAAK +                                    |
| M2B7                  | gi 136429    | 1550  | 176.5 | 737.70   | 2210.07      | 2210.10      | -0.02 | 0.00 | 61.62 | 0.00   | 1    | LGEHNIDVLEGNEQFINAAK +                                    |
| M2B7                  | gi 136429    | 1551  | 176.5 | 737.70   | 2210.08      | 2210.10      | -0.02 | 0.00 | 54.37 | 0.02   | 1    | LGEHNIDVLEGNEQFINAAK +                                    |
| M2B7                  | gi 136429    | 1552  | 176.5 | 737.70   | 2210.08      | 2210.10      | -0.01 | 0.00 | 32.21 | 3.23   | 1    | LGEHNIDVLEGNEQFINAAK +                                    |
| M2B4                  | gi 6981420   | 1554  | 46.99 | 737.70   | 2210.08      | 2210.10      | -0.01 | 0.00 | 17.48 | 95.56  | 2    | LGEHNINVLEGDEQFINAAK +                                    |
| M2B7                  | gi 6981420   | 1550  | 46.99 | 737.70   | 2210.07      | 2210.10      | -0.02 | 0.00 | 46.99 | 0.11   | 2    | LGEHNINVLEGDEQFINAAK +                                    |
| M2B7                  | gi 6981420   | 1551  | 46.99 | 737.70   | 2210.08      | 2210.10      | -0.02 | 0.00 | 36.14 | 1.30   | 2    | LGEHNINVLEGDEQFINAAK +                                    |
| M2B7                  | gi 6981420   | 1552  | 46.99 | 737.70   | 2210.08      | 2210.10      | -0.01 | 0.00 | 26.15 | 13.03  | 2    | LGEHNINVLEGDEQFINAAK +                                    |
| M2B4                  | gi 16973318  | 719   | 62.33 | 581.29   | 1160.56      | 1160.58      | -0.02 | 0.00 | 62.33 | 0.00   | 1    | LGTDWALTR +                                               |
| M2B7                  | gi 37790792  | 1261  | 159.4 | 514.60   | 1540.77      | 1540.79      | -0.02 | 0.00 | 11.89 | 292.51 | 2    | LGVTQCTIAHALEK +<br>Carbamidomethyl (C)                   |
| M2B7                  | gi 4733946   | 1261  | 208.4 | 514.60   | 1540.77      | 1540.79      | -0.02 | 0.00 | 13.15 | 218.84 | 1    | LGVTQCTIAHALEK +<br>Carbamidomethyl (C); Deamidation (NQ) |
| M2B7                  | gi 13160142  | 1261  | 191.4 | 514.60   | 1540.77      | 1540.79      | -0.02 | 0.00 | 13.15 | 218.84 | 1    | LGVTQCTIAHALEK +<br>Carbamidomethyl (C); Deamidation (NQ) |
| M2B7                  | gi 22331535  | 1261  | 182.9 | 514.60   | 1540.77      | 1540.79      | -0.02 | 0.00 | 13.15 | 218.84 | 1    | LGVTQCTIAHALEK +<br>Carbamidomethyl (C); Deamidation (NQ) |
| M2B7                  | gi 80973758  | 1261  | 177   | 514.60   | 1540.77      | 1540.79      | -0.02 | 0.00 | 13.15 | 218.84 | 1    | LGVTQCTIAHALEK +<br>Carbamidomethyl (C); Deamidation (NQ) |
| M2B7                  | gi 135061    | 1261  | 105   | 514.60   | 1540.77      | 1540.79      | -0.02 | 0.00 | 13.15 | 218.84 | 1    | LGVTQCTIAHALEK +<br>Carbamidomethyl (C); Deamidation (NQ) |
| M2B7                  | gi 115310620 | 1261  | 74.04 | 514.60   | 1540.77      | 1540.79      | -0.02 | 0.00 | 13.15 | 218.84 | 1    | LGVTQCTIAHALEK +<br>Carbamidomethyl (C); Deamidation (NQ) |
| M2B7                  | gi 530207    | 1046  | 132.7 | 679.88   | 1357.75      | 1357.76      | -0.02 | 0.00 | 74.53 | 0.00   | 1    | LIALDMGALVAGAK + Oxidation (M)                            |
| M2B4                  | gi 168324    | 1256  | 168.8 | 765.89   | 1529.77      | 1529.78      | -0.01 | 0.00 | 85.28 | 0.00   | 1    | LIFGADSPAQENR +                                           |
| M2B4                  | gi 20599     | 1256  | 162.6 | 765.89   | 1529.77      | 1529.78      | -0.01 | 0.00 | 85.28 | 0.00   | 1    | LIFGADSPAQENR +                                           |
| M2B7                  | gi 114566045 | 1046  | 47.39 | 679.88   | 1357.75      | 1357.76      | -0.02 | 0.00 | 47.39 | 0.06   | 2    | LLALDMGSLVAGAK +                                          |
| M2B7                  | gi 4733946   | 1084  | 208.4 | 694.35   | 1386.69      | 1386.69      | -0.01 | 0.00 | 81.66 | 0.00   | 1    | LLPDAVGTTCGQR + Carbamidomethyl<br>(C)                    |

Table S4. Contd.....

| SDS_PAGE<br>Zone Code | Accession        | Query | Score | Observed | Mr<br>(Expt) | Mr<br>(Calc) | Delta | Miss | Score | Expect | Ran<br>k | Peptide Sequence                                |
|-----------------------|------------------|-------|-------|----------|--------------|--------------|-------|------|-------|--------|----------|-------------------------------------------------|
| M2B7                  | gi 13160142      | 1084  | 191.4 | 694.35   | 1386.69      | 1386.69      | -0.01 | 0.00 | 81.66 | 0.00   | 1        | LLPDAVGTTCGQR + Carbamidomethyl (C)             |
| M2B7                  | gi 1351138       | 1084  | 181.7 | 694.35   | 1386.69      | 1386.69      | -0.01 | 0.00 | 81.66 | 0.00   | 1        | LLPDAVGTTCGQR + Carbamidomethyl (C)             |
| M2B7                  | gi 37790792      | 1084  | 159.4 | 694.35   | 1386.69      | 1386.69      | -0.01 | 0.00 | 81.66 | 0.00   | 1        | LLPDAVGTTCGQR + Carbamidomethyl (C)             |
| M2B7                  | gi 135061        | 1084  | 105   | 694.35   | 1386.69      | 1386.69      | -0.01 | 0.00 | 81.66 | 0.00   | 1        | LLPDAVGTTCGQR + Carbamidomethyl (C)             |
| M2B7                  | gi 80973758      | 1084  | 177   | 694.35   | 1386.69      | 1386.69      | -0.01 | 0.00 | 67.20 | 0.00   | 2        | LLPDAVGTTCNQR +                                 |
| M2B7                  | gi 42525587      | 1063  | 46.44 | 686.35   | 1370.68      | 1370.69      | -0.02 | 1.00 | 46.44 | 0.09   | 1        | LNDLENHFNKK +                                   |
| M2B4                  | gi 168324        | 248   | 168.8 | 481.77   | 961.52       | 961.53       | -0.02 | 0.00 | 59.51 | 0.00   | 2        | LNLGVGAYR +                                     |
| M2B4                  | gi 531555        | 248   | 102.4 | 481.77   | 961.52       | 961.53       | -0.02 | 0.00 | 59.51 | 0.00   | 2        | LNLGVGAYR +                                     |
| M2B1                  | gi 11874219<br>3 | 632   | 69.87 | 561.78   | 1121.56      | 1121.57      | -0.02 | 0.00 | 58.47 | 0.01   | 2        | LQQQIATYR + 2 Deamidation (NQ)                  |
| M2B4                  | gi 11874219<br>3 | 633   | 69.87 | 561.79   | 1121.56      | 1121.57      | -0.02 | 0.00 | 69.87 | 0.00   | 2        | LQQQIATYR + 2 Deamidation (NQ)                  |
| M2B1                  | gi 41619832      | 488   | 48.55 | 533.75   | 1065.49      | 1065.49      | -0.01 | 1.00 | 48.55 | 0.04   | 2        | MEMEKVQR + Oxidation (M)                        |
| M2B3                  | gi 11919275<br>8 | 529   | 45.27 | 541.25   | 1080.49      | 1080.48      | 0.01  | 1.00 | 41.53 | 0.23   | 2        | MGMAGERASR + Oxidation (M)                      |
| M2B4                  | gi 11919275<br>8 | 528   | 45.27 | 541.25   | 1080.48      | 1080.48      | 0.00  | 1.00 | 45.27 | 0.08   | 2        | MGMAGERASR + Oxidation (M)                      |
| M2B1                  | gi 42561108      | 1198  | 45.21 | 738.38   | 1474.74      | 1474.73      | 0.00  | 0.00 | 45.21 | 0.18   | 1        | MINNVGIDIVENK + Deamidation (NQ); Oxidation (M) |
| M2B7                  | gi 42561108      | 1200  | 45.21 | 738.38   | 1474.75      | 1474.73      | 0.02  | 0.00 | 21.79 | 38.32  | 2        | MINNVGIDIVENK + Deamidation (NQ); Oxidation (M) |
| M2B4                  | gi 11562356<br>9 | 1256  | 66.13 | 765.89   | 1529.77      | 1529.79      | -0.02 | 1.00 | 66.13 | 0.00   | 2        | MLLGADSPALKENR + Oxidation (M)                  |
| M2B4                  | gi 11546943<br>6 | 1476  | 191.5 | 601.63   | 1801.85      | 1801.89      | -0.03 | 0.00 | 14.77 | 175.49 | 1        | MSHISTGGGASLELLEGK + Oxidation (M)              |
| M2B1                  | gi 16124126      | 583   | 52.17 | 553.30   | 1104.58      | 1104.58      | 0.00  | 0.00 | 52.17 | 0.03   | 2        | MSQLIESAVK +                                    |
| M2B4                  | gi 11540136<br>2 | 192   | 50.63 | 457.19   | 912.37       | 912.37       | 0.01  | 0.00 | 50.63 | 0.01   | 1        | MTIDDMR + 2 Oxidation (M)                       |
| M2B7                  | gi 11540136<br>2 | 193   | 50.63 | 457.20   | 912.38       | 912.37       | 0.01  | 0.00 | 34.84 | 0.55   | 1        | MTIDDMR + 2 Oxidation (M)                       |
| M2B4                  | gi 10989842<br>2 | 192   | 50.63 | 457.19   | 912.37       | 912.37       | 0.01  | 0.00 | 50.63 | 0.01   | 2        | MTLDDMR + 2 Oxidation (M)                       |
| M2B7                  | gi 10989842<br>2 | 193   | 50.63 | 457.20   | 912.38       | 912.37       | 0.01  | 0.00 | 34.84 | 0.55   | 2        | MTLDDMR + 2 Oxidation (M)                       |
| M2B7                  | gi 92871836      | 1409  | 51.43 | 840.91   | 1679.82      | 1679.83      | -0.01 | 0.00 | 51.43 | 0.04   | 2        | NAVISVPAYFNDSQR +                               |
| M2B7                  | gi 6911553       | 1409  | 308.8 | 840.91   | 1679.82      | 1679.83      | -0.01 | 0.00 | 66.01 | 0.00   | 1        | NAVVTVPAYFNDSQR +                               |
| M2B7                  | gi 425194        | 1409  | 215.9 | 840.91   | 1679.82      | 1679.83      | -0.01 | 0.00 | 66.01 | 0.00   | 1        | NAVVTVPAYFNDSQR +                               |
| M2B7                  | gi 92871811      | 1409  | 101.9 | 840.91   | 1679.82      | 1679.83      | -0.01 | 0.00 | 66.01 | 0.00   | 1        | NAVVTVPAYFNDSQR +                               |

Table S4. Contd.....

| SDS_PAGE<br>Zone Code | Accession    | Query | Score | Observed | Mr<br>(Expt) | Mr<br>(Calc) | Delta | Miss | Score  | Expect | Rank | Peptide Sequence                          |
|-----------------------|--------------|-------|-------|----------|--------------|--------------|-------|------|--------|--------|------|-------------------------------------------|
| M2B4                  | gi 1730557   | 222   | 118.3 | 468.24   | 934.46       | 934.48       | -0.01 | 0.00 | 33.51  | 1.99   | 1    | NDISYPVK +                                |
| M2B5                  | gi 1730557   | 221   | 118.3 | 468.24   | 934.46       | 934.48       | -0.01 | 0.00 | 48.79  | 0.06   | 1    | NDISYPVK +                                |
| M2B7                  | gi 1351138   | 337   | 181.7 | 507.79   | 1013.57      | 1013.59      | -0.02 | 0.00 | 51.45  | 0.03   | 1    | NEIVALLSR +                               |
| M2B7                  | gi 74316933  | 337   | 51.45 | 507.79   | 1013.57      | 1013.56      | 0.01  | 1.00 | 51.45  | 0.03   | 2    | NELVAKNAR +                               |
| M2B3                  | gi 1168190   | 188   | 55.85 | 454.26   | 906.51       | 906.52       | 0.00  | 0.00 | 40.93  | 0.14   | 1    | NLISVAYK +                                |
| M2B4                  | gi 1168190   | 187   | 55.85 | 454.26   | 906.50       | 906.52       | -0.02 | 0.00 | 16.56  | 55.28  | 2    | NLISVAYK +                                |
| M2B3                  | gi 1168191   | 188   | 58.22 | 454.26   | 906.51       | 906.52       | 0.00  | 0.00 | 40.93  | 0.14   | 2    | NLLSVAYK +                                |
| M2B3                  | gi 34452071  | 188   | 55.85 | 454.26   | 906.51       | 906.52       | 0.00  | 0.00 | 40.93  | 0.14   | 2    | NLLSVAYK +                                |
| M2B3                  | gi 1168193   | 188   | 52.24 | 454.26   | 906.51       | 906.52       | 0.00  | 0.00 | 40.93  | 0.14   | 2    | NLLSVAYK +                                |
| M2B3                  | gi 13928270  | 188   | 49.01 | 454.26   | 906.51       | 906.52       | 0.00  | 0.00 | 40.93  | 0.14   | 2    | NLLSVAYK +                                |
| M2B3                  | gi 115476520 | 188   | 46.1  | 454.26   | 906.51       | 906.52       | 0.00  | 0.00 | 40.93  | 0.14   | 2    | NLLSVAYK +                                |
| M2B3                  | gi 10719663  | 188   | 45.3  | 454.26   | 906.51       | 906.52       | 0.00  | 0.00 | 40.93  | 0.14   | 2    | NLLSVAYK +                                |
| M2B1                  | gi 119912330 | 546   | 117.7 | 545.76   | 1089.50      | 1089.49      | 0.01  | 0.00 | 71.69  | 0.00   | 2    | QAMQNLNDR + Deamidation (NQ)              |
| M2B1                  | gi 6831664   | 305   | 47.56 | 499.79   | 997.56       | 997.56       | 0.00  | 0.00 | 47.56  | 0.03   | 1    | QAVDISPLR +                               |
| M2B1                  | gi 116058572 | 305   | 47.56 | 499.79   | 997.56       | 997.56       | 0.00  | 0.00 | 47.56  | 0.03   | 2    | QAVDLSPLR +                               |
| M2B7                  | gi 15228683  | 1368  | 191.3 | 811.38   | 1620.74      | 1620.76      | -0.02 | 0.00 | 26.80  | 8.52   | 1    | QAYYLSMEFLQGR + Oxidation (M)             |
| M2B7                  | gi 629646    | 1368  | 190.1 | 811.38   | 1620.74      | 1620.76      | -0.02 | 0.00 | 26.80  | 8.52   | 1    | QAYYLSMEFLQGR + Oxidation (M)             |
| M2B7                  | gi 13195430  | 1368  | 128.3 | 811.38   | 1620.74      | 1620.76      | -0.02 | 0.00 | 26.80  | 8.52   | 1    | QAYYLSMEFLQGR + Oxidation (M)             |
| M2B7                  | gi 130172    | 1368  | 121.3 | 811.38   | 1620.74      | 1620.76      | -0.02 | 0.00 | 26.80  | 8.52   | 1    | QAYYLSMEFLQGR + Oxidation (M)             |
| M2B7                  | gi 1730557   | 1368  | 118.3 | 811.38   | 1620.74      | 1620.76      | -0.02 | 0.00 | 26.80  | 8.52   | 1    | QAYYLSMEFLQGR + Oxidation (M)             |
| M2B7                  | gi 40716501  | 676   | 47.1  | 574.76   | 1147.50      | 1147.52      | -0.02 | 0.00 | 47.10  | 0.04   | 1    | QDVFNFSYK + Deamidation (NQ)              |
| M2B7                  | gi 109715750 | 1525  | 176.3 | 665.00   | 1991.99      | 1992.01      | -0.02 | 1.00 | 35.10  | 1.74   | 2    | QIVSSIDEDNKVIVFER + 2<br>Deamidation (NQ) |
| M2B7                  | gi 1771261   | 1525  | 564.8 | 665.00   | 1991.99      | 1992.02      | -0.03 | 1.00 | 121.65 | 0.00   | 1    | QIVSSTNEEDKVIVFER +                       |
| M2B2                  | gi 89074323  | 261   | 48.68 | 487.26   | 972.50       | 972.50       | 0.01  | 0.00 | 45.42  | 0.13   | 1    | QNLSEINR +                                |
| M2B3                  | gi 89074323  | 260   | 48.68 | 487.26   | 972.50       | 972.50       | 0.00  | 0.00 | 48.68  | 0.06   | 1    | QNLSEINR +                                |
| M2B7                  | gi 89074323  | 258   | 48.68 | 487.25   | 972.49       | 972.50       | -0.01 | 0.00 | 30.25  | 3.80   | 1    | QNLSEINR +                                |
| M2B4                  | gi 121892870 | 680   | 57.37 | 576.78   | 1151.55      | 1151.56      | 0.00  | 1.00 | 21.74  | 30.27  | 2    | QNYDEIRSK +                               |
| M2B7                  | gi 57336886  | 1269  | 69.98 | 517.92   | 1550.73      | 1550.76      | -0.02 | 1.00 | 34.74  | 1.70   | 1    | QPIGTSAQTDKDYK +                          |
| M2B7                  | gi 13160142  | 370   | 191.4 | 514.27   | 1026.53      | 1026.55      | -0.02 | 0.00 | 49.34  | 0.04   | 1    | QQGLDITPR +                               |
| M2B7                  | gi 1351138   | 370   | 181.7 | 514.27   | 1026.53      | 1026.55      | -0.02 | 0.00 | 49.34  | 0.04   | 1    | QQGLDITPR +                               |
| M2B7                  | gi 80973758  | 370   | 177   | 514.27   | 1026.53      | 1026.55      | -0.02 | 0.00 | 49.34  | 0.04   | 1    | QQGLDITPR +                               |
| M2B7                  | gi 4733946   | 370   | 208.4 | 514.27   | 1026.53      | 1026.55      | -0.02 | 0.00 | 49.34  | 0.04   | 2    | QQGLNITPR + Deamidation (NQ)              |
| M2B7                  | gi 22331535  | 370   | 182.9 | 514.27   | 1026.53      | 1026.55      | -0.02 | 0.00 | 49.34  | 0.04   | 2    | QQGLNITPR + Deamidation (NQ)              |
| M2B1                  | gi 91092104  | 505   | 48.84 | 537.29   | 1072.57      | 1072.58      | 0.00  | 0.00 | 48.84  | 0.07   | 2    | QTLDEAGVK +                               |
| M2B1                  | gi 121582963 | 1336  | 53.39 | 793.89   | 1585.76      | 1585.79      | -0.03 | 1.00 | 53.39  | 0.02   | 2    | RAAIEEALQACPTGR + Deamidation<br>(NQ)     |

Table S4. Contd.....

| SDS_PAGE<br>Zone Code | Accession    | Query | Score | Observed | Mr<br>(Expt) | Mr<br>(Calc) | Delta | Miss | Score | Expect | Rank | Peptide Sequence                    |
|-----------------------|--------------|-------|-------|----------|--------------|--------------|-------|------|-------|--------|------|-------------------------------------|
| M2B7                  | gi 1688296   | 960   | 48.4  | 656.82   | 1311.63      | 1311.65      | -0.02 | 0.00 | 48.40 | 0.06   | 1    | SFGAAVIYNNEK +                      |
| M2B7                  | gi 15224999  | 960   | 48.4  | 656.82   | 1311.63      | 1311.65      | -0.02 | 0.00 | 48.40 | 0.06   | 2    | SFGAAVIYNNQK + Deamidation (NQ)     |
| M2B7                  | gi 13516907  | 503   | 82.87 | 537.26   | 1072.50      | 1072.50      | 0.00  | 0.00 | 22.26 | 16.75  | 1    | SFMVYAPSR + Oxidation (M)           |
| M2B4                  | gi 92872649  | 969   | 71.82 | 658.35   | 1314.69      | 1314.71      | -0.02 | 0.00 | 31.94 | 3.04   | 1    | SIQVIVVTDGER +                      |
| M2B4                  | gi 57336886  | 400   | 69.98 | 517.30   | 1032.58      | 1032.60      | -0.02 | 0.00 | 35.24 | 0.83   | 1    | SLGAAIIFNK +                        |
| M2B4                  | gi 54873534  | 400   | 53.29 | 517.30   | 1032.58      | 1032.60      | -0.02 | 0.00 | 35.24 | 0.83   | 1    | SLGAAIIFNK +                        |
| M2B4                  | gi 91093032  | 1214  | 56.7  | 497.90   | 1490.69      | 1490.70      | -0.01 | 0.00 | 21.60 | 30.10  | 1    | SLSPNAVDPNSFSR + Deamidation (NQ)   |
| M2B7                  | gi 3377802   | 1070  | 123.8 | 689.85   | 1377.68      | 1377.70      | -0.02 | 0.00 | 62.09 | 0.00   | 1    | SSSIGNGVQFLNR +                     |
| M2B7                  | gi 12082281  | 1070  | 123.8 | 689.85   | 1377.68      | 1377.70      | -0.02 | 0.00 | 62.09 | 0.00   | 1    | SSSIGNGVQFLNR +                     |
| M2B7                  | gi 29289943  | 1070  | 123.8 | 689.85   | 1377.68      | 1377.70      | -0.02 | 0.00 | 62.09 | 0.00   | 1    | SSSIGNGVQFLNR +                     |
| M2B7                  | gi 1771261   | 916   | 564.8 | 643.80   | 1285.59      | 1285.59      | 0.00  | 0.00 | 95.40 | 0.00   | 1    | SVSEGGIGFDYR +                      |
| M2B7                  | gi 109715750 | 916   | 176.3 | 643.80   | 1285.59      | 1285.59      | 0.00  | 0.00 | 95.40 | 0.00   | 1    | SVSEGGIGFDYR +                      |
| M2B2                  | gi 113476798 | 226   | 63.54 | 472.27   | 942.52       | 942.50       | 0.01  | 0.00 | 20.84 | 30.38  | 1    | TASETPLK +                          |
| M2B7                  | gi 1771261   | 245   | 564.8 | 480.73   | 959.45       | 959.45       | -0.01 | 0.00 | 32.48 | 1.99   | 1    | TCVVYYR + Carbamidomethyl (C)       |
| M2B4                  | gi 92887207  | 975   | 160.3 | 659.81   | 1317.60      | 1317.62      | -0.02 | 0.00 | 60.29 | 0.00   | 1    | TIEVNNTDAEGR +                      |
| M2B7                  | gi 62122767  | 464   | 86.25 | 530.78   | 1059.54      | 1059.56      | -0.02 | 0.00 | 49.15 | 0.08   | 2    | TLLDLNTR +                          |
| M2B7                  | gi 33326375  | 1031  | 157.3 | 676.35   | 1350.68      | 1350.71      | -0.03 | 0.00 | 31.10 | 3.90   | 1    | TLSIIDSGIGMTK + Oxidation (M)       |
| M2B4                  | gi 62526587  | 1542  | 227.5 | 696.02   | 2085.05      | 2085.09      | -0.04 | 1.00 | 64.12 | 0.00   | 1    | TMGLTDKDIVLSGGHTLGR + Oxidation (M) |
| M2B3                  | gi 62526587  | 686   | 227.5 | 577.76   | 1153.50      | 1153.52      | -0.01 | 0.00 | 46.27 | 0.07   | 1    | TNTGGPFGTMR + Oxidation (M)         |
| M2B3                  | gi 62526587  | 689   | 227.5 | 577.77   | 1153.53      | 1153.52      | 0.01  | 0.00 | 17.10 | 78.01  | 2    | TNTGGPFGTMR + Oxidation (M)         |
| M2B4                  | gi 62526587  | 687   | 227.5 | 577.76   | 1153.51      | 1153.52      | -0.01 | 0.00 | 50.56 | 0.03   | 1    | TNTGGPFGTMR + Oxidation (M)         |
| M2B3                  | gi 6984140   | 326   | 90.02 | 504.25   | 1006.49      | 1006.51      | -0.02 | 0.00 | 32.79 | 2.62   | 1    | TTIFSPEGR +                         |
| M2B4                  | gi 67043505  | 1210  | 174   | 744.34   | 1486.67      | 1486.69      | -0.02 | 0.00 | 77.03 | 0.00   | 1    | TTPSYVAFTDTER +                     |
| M2B4                  | gi 26892070  | 1210  | 174   | 744.34   | 1486.67      | 1486.69      | -0.02 | 0.00 | 77.03 | 0.00   | 1    | TTPSYVAFTDTER +                     |
| M2B4                  | gi 640325    | 1210  | 171.9 | 744.34   | 1486.67      | 1486.69      | -0.02 | 0.00 | 77.03 | 0.00   | 1    | TTPSYVAFTDTER +                     |
| M2B4                  | gi 8918240   | 1210  | 145.4 | 744.34   | 1486.67      | 1486.69      | -0.02 | 0.00 | 77.03 | 0.00   | 1    | TTPSYVAFTDTER +                     |
| M2B4                  | gi 47210309  | 1210  | 82.63 | 744.34   | 1486.67      | 1486.69      | -0.02 | 0.00 | 77.03 | 0.00   | 1    | TTPSYVAFTDTER +                     |
| M2B7                  | gi 6911553   | 1211  | 308.8 | 744.35   | 1486.68      | 1486.69      | -0.01 | 0.00 | 73.56 | 0.00   | 1    | TTPSYVAFTDTER +                     |
| M2B7                  | gi 26892070  | 1211  | 174   | 744.35   | 1486.68      | 1486.69      | -0.01 | 0.00 | 73.56 | 0.00   | 1    | TTPSYVAFTDTER +                     |
| M2B7                  | gi 67043505  | 1211  | 174   | 744.35   | 1486.68      | 1486.69      | -0.01 | 0.00 | 73.56 | 0.00   | 1    | TTPSYVAFTDTER +                     |
| M2B7                  | gi 640325    | 1211  | 171.9 | 744.35   | 1486.68      | 1486.69      | -0.01 | 0.00 | 73.56 | 0.00   | 1    | TTPSYVAFTDTER +                     |
| M2B7                  | gi 8918240   | 1211  | 145.4 | 744.35   | 1486.68      | 1486.69      | -0.01 | 0.00 | 73.56 | 0.00   | 1    | TTPSYVAFTDTER +                     |
| M2B7                  | gi 47210309  | 1211  | 82.63 | 744.35   | 1486.68      | 1486.69      | -0.01 | 0.00 | 73.56 | 0.00   | 1    | TTPSYVAFTDTER +                     |
| M2B7                  | gi 17647515  | 1211  | 109.5 | 744.35   | 1486.68      | 1486.69      | -0.01 | 0.00 | 73.56 | 0.00   | 2    | TTPSYVAFTESER +                     |

Table S4. Contd.....

| SDS_PAGE<br>Zone Code | Accession    | Query | Score | Observed | Mr<br>(Expt) | Mr<br>(Calc) | Delta | Miss | Score | Expect | Rank | Peptide Sequence                            |
|-----------------------|--------------|-------|-------|----------|--------------|--------------|-------|------|-------|--------|------|---------------------------------------------|
| M2B4                  | gi 3114993   | 1210  | 174   | 744.34   | 1486.67      | 1486.69      | -0.02 | 0.00 | 77.03 | 0.00   | 2    | TTPSYVAFTNTER + Deamidation (NQ)            |
| M2B4                  | gi 168324    | 1319  | 168.8 | 524.62   | 1570.84      | 1570.86      | -0.02 | 0.00 | 24.01 | 16.68  | 1    | TVPHLADAIHAAVTR +                           |
| M2B4                  | gi 115434198 | 1226  | 176.5 | 749.91   | 1497.81      | 1497.82      | -0.01 | 0.00 | 42.36 | 0.17   | 1    | TVVSIPCGPSALAVK + Carbamidomethyl (C)       |
| M2B4                  | gi 77745483  | 1226  | 110.8 | 749.91   | 1497.81      | 1497.82      | -0.01 | 0.00 | 42.36 | 0.17   | 1    | TVVSIPCGPSALAVK + Carbamidomethyl (C)       |
| M2B7                  | gi 1771261   | 1130  | 564.8 | 711.83   | 1421.65      | 1421.66      | -0.01 | 0.00 | 71.00 | 0.00   | 1    | VALDSDAWEFGGR +                             |
| M2B4                  | gi 531555    | 1047  | 102.4 | 680.37   | 1358.73      | 1358.75      | -0.02 | 0.00 | 42.87 | 0.21   | 1    | VATIQGLSGTGSLR +                            |
| M2B7                  | gi 136429    | 104   | 176.5 | 421.75   | 841.49       | 841.50       | -0.02 | 0.00 | 51.65 | 0.02   | 1    | VATVSLPR +                                  |
| M2B7                  | gi 136429    | 106   | 176.5 | 421.75   | 841.49       | 841.50       | -0.01 | 0.00 | 54.61 | 0.01   | 1    | VATVSLPR +                                  |
| M2B4                  | gi 21536853  | 1530  | 272.4 | 1008.47  | 2014.92      | 2014.94      | -0.02 | 0.00 | 87.40 | 0.00   | 1    | VDLNVPLDDNSNITDDTR +                        |
| M2B4                  | gi 114653460 | 435   | 48.13 | 524.24   | 1046.47      | 1046.49      | -0.02 | 0.00 | 26.93 | 5.64   | 1    | VELENAESR + Deamidation (NQ)                |
| M2B4                  | gi 120666    | 64    | 263.1 | 407.75   | 813.48       | 813.50       | -0.01 | 0.00 | 54.36 | 0.01   | 1    | VIISAPSK +                                  |
| M2B4                  | gi 462137    | 64    | 141   | 407.75   | 813.48       | 813.50       | -0.01 | 0.00 | 54.36 | 0.01   | 1    | VIISAPSK +                                  |
| M2B4                  | gi 118351869 | 64    | 97.06 | 407.75   | 813.48       | 813.50       | -0.01 | 0.00 | 54.36 | 0.01   | 2    | VILSAPSK +                                  |
| M2B1                  | gi 123534    | 182   | 155.3 | 451.25   | 900.49       | 900.50       | -0.01 | 0.00 | 48.91 | 0.07   | 1    | VLQISGER +                                  |
| M2B1                  | gi 3582434   | 182   | 77.93 | 451.25   | 900.49       | 900.50       | -0.01 | 0.00 | 48.91 | 0.07   | 1    | VLQISGER +                                  |
| M2B1                  | gi 2347090   | 182   | 48.91 | 451.25   | 900.49       | 900.50       | -0.01 | 0.00 | 48.91 | 0.07   | 2    | VLQISGQR + Deamidation (NQ)                 |
| M2B4                  | gi 17026394  | 961   | 69.6  | 656.87   | 1311.73      | 1311.75      | -0.02 | 0.00 | 65.33 | 0.00   | 1    | VLQLETAAGAAIR +                             |
| M2B7                  | gi 17026394  | 962   | 69.6  | 656.88   | 1311.75      | 1311.75      | 0.00  | 0.00 | 55.94 | 0.00   | 1    | VLQLETAAGAAIR +                             |
| M2B1                  | gi 6012952   | 958   | 65.32 | 655.85   | 1309.68      | 1309.69      | -0.01 | 0.00 | 65.32 | 0.00   | 1    | VNQSYVIATSTK +                              |
| M2B7                  | gi 530207    | 1465  | 132.7 | 892.93   | 1783.85      | 1783.86      | -0.01 | 0.00 | 45.28 | 0.16   | 1    | VQLDSQP EEDNLER +                           |
| M2B7                  | gi 537446    | 1465  | 92.13 | 892.93   | 1783.85      | 1783.86      | -0.01 | 0.00 | 45.28 | 0.16   | 1    | VQLDSQP EEDNLER +                           |
| M2B4                  | gi 118390    | 857   | 59.37 | 619.32   | 1236.63      | 1236.62      | 0.01  | 0.00 | 59.37 | 0.01   | 1    | VSAANSRPPNPQ +                              |
| M2B4                  | gi 47223978  | 584   | 113.1 | 553.76   | 1105.50      | 1105.52      | -0.02 | 0.00 | 71.28 | 0.00   | 1    | VTMQNLNDR + Oxidation (M)                   |
| M2B3                  | gi 12852628  | 586   | 117.6 | 553.76   | 1105.51      | 1105.52      | -0.01 | 0.00 | 71.64 | 0.00   | 2    | VTMQNLNDR + Deamidation (NQ); Oxidation (M) |
| M2B4                  | gi 12852628  | 584   | 117.6 | 553.76   | 1105.50      | 1105.52      | -0.02 | 0.00 | 71.28 | 0.00   | 2    | VTMQNLNDR + Deamidation (NQ); Oxidation (M) |
| M2B4                  | gi 76575132  | 1245  | 60.75 | 759.87   | 1517.73      | 1517.74      | -0.01 | 0.00 | 60.75 | 0.00   | 1    | VVGAFLEGGSPDENK +                           |
| M2B7                  | gi 13195430  | 403   | 128.3 | 518.75   | 1035.49      | 1035.51      | -0.02 | 0.00 | 27.40 | 7.15   | 1    | WSDLIMQK + Oxidation (M)                    |
| M2B7                  | gi 34305475  | 403   | 101.3 | 518.75   | 1035.49      | 1035.51      | -0.02 | 0.00 | 27.40 | 7.15   | 1    | WSDLIMQK + Oxidation (M)                    |
| M2B4                  | gi 2213867   | 1455  | 115.1 | 883.94   | 1765.86      | 1765.89      | -0.03 | 0.00 | 82.41 | 0.00   | 1    | YADELIANAAYIGTPGK +                         |
| M2B4                  | gi 92887207  | 1024  | 160.3 | 671.33   | 1340.65      | 1340.67      | -0.02 | 0.00 | 71.94 | 0.00   | 1    | YAGDVSSGIIFGR +                             |
| M2B7                  | gi 92887207  | 1023  | 160.3 | 671.33   | 1340.65      | 1340.67      | -0.02 | 0.00 | 73.18 | 0.00   | 1    | YAGDVSSGIIFGR +                             |
| M2B7                  | gi 1771261   | 708   | 564.8 | 579.77   | 1157.53      | 1157.52      | 0.01  | 0.00 | 20.97 | 24.04  | 1    | YEGGLEEFSK +                                |
| M2B7                  | gi 4586236   | 708   | 66.73 | 579.77   | 1157.53      | 1157.52      | 0.01  | 0.00 | 20.97 | 24.04  | 1    | YEGGLEEFSK +                                |

Table S4. Contd.....

| SDS_PAGE Zone Code | Accession    | Query | Score | Observed | Mr (Expt) | Mr (Calc) | Delta | Miss | Score | Expect | Rank | Peptide Sequence              |
|--------------------|--------------|-------|-------|----------|-----------|-----------|-------|------|-------|--------|------|-------------------------------|
| M2B7               | gi 974782    | 1396  | 48.39 | 553.60   | 1657.79   | 1657.82   | -0.03 | 0.00 | 48.39 | 0.07   | 1    | YGAGIGPGVYDIHSPR +            |
| M2B7               | gi 15228683  | 1288  | 191.3 | 783.37   | 1564.73   | 1564.76   | -0.02 | 0.00 | 90.34 | 0.00   | 1    | YHAEFTPLFSPEK +               |
| M2B7               | gi 629646    | 1288  | 190.1 | 783.37   | 1564.73   | 1564.76   | -0.02 | 0.00 | 90.34 | 0.00   | 1    | YHAEFTPLFSPEK +               |
| M2B7               | gi 22331535  | 912   | 182.9 | 641.81   | 1281.61   | 1281.64   | -0.03 | 0.00 | 73.10 | 0.00   | 1    | YIGDGVVEFLNR +                |
| M2B3               | gi 118099953 | 368   | 47.97 | 513.76   | 1025.50   | 1025.51   | -0.02 | 1.00 | 47.97 | 0.05   | 2    | YKSSISADR +                   |
| M2B4               | gi 21536853  | 1223  | 272.4 | 499.93   | 1496.78   | 1496.81   | -0.03 | 0.00 | 8.28  | 552.95 | 1    | YLKPSVAGFLMQK + Oxidation (M) |
| M2B4               | gi 21536853  | 500   | 272.4 | 536.82   | 1071.62   | 1071.64   | -0.02 | 0.00 | 29.89 | 2.72   | 1    | YSLKPLVPR +                   |
| M2B4               | gi 115469436 | 500   | 191.5 | 536.82   | 1071.62   | 1071.64   | -0.02 | 0.00 | 29.89 | 2.72   | 1    | YSLKPLVPR +                   |

  

Image complement for Table S4: Proteins from Non-Carotenoid-Protein Complex (NCPC) separated in SDS\_PAGE. Showing is the shaded area of fractions of the gel zone harvested for in gel tripityc digestion and MS/MS analysis. Label gel zone is coded as DCP1/DCP2/DCP3 in table discrimination.. Label gel zone is coded as M2\_B1/ M2\_B2/M2\_B3/M2\_B4/M2\_B5/M2\_B6/M2\_B7 in table discrimination.

**Table S5. Supplementary Data: Listing Identified Proteins in the Non Carotenoid-protein Complex (NCPC) Assined to Cassava EST Data Base (NCBI, ESTIMA, EMBRAPA, CIAT, and RIKEN) and Arabidopsis Loci Data Base**

| SDS_PAG E Zone Code | Peptide sequence (MASCOT Server) | Cassava EST Database     | Arabidopsis Locus | Total Score | E_Value  | Protein Name                                                                   | Proteins Abreviation |
|---------------------|----------------------------------|--------------------------|-------------------|-------------|----------|--------------------------------------------------------------------------------|----------------------|
| M2_B1               | AAMENGILTVTPKEEVK                | scaff_8565_1             | AT3G46230.1       | 142         | 1.0e-34  | ATHSP17.4                                                                      | HSP17.4              |
| M2_B1               | AAMENGILTVTPKEEVK                | scaff_8720_1             | NP_194497         | 210         | 1.0e-54  | HSP21                                                                          | HSP21                |
| M2_B1               | AAMENGILTVTPKEEVK                | scaff_8870_1             | AT5G59720.1       | 220         | 7.0e-58  | HSP18.2                                                                        | HSP18.2              |
| M2_B5               | AAQPSLIADDIATK +                 | CK644580                 | AT2G36390.1       | 40          | 4.0e-04  | BE3, SBE2.1, F1O11.2, F1O11_2, BRANCHING ENZYME 3, STARCH BRANCHING ENZYME 2.1 | BE3                  |
| M2_B6               | AASFNIIPSSTGAAK                  | Cassava.415.C3.Contig531 | At3g04120.1       | 582         | 2.3e-166 | glyceraldehyde-3-phosphate dehydrogenase                                       | GAPC                 |

Table S5. Contd.....

| SDS_PAG<br>E_Zone<br>Code | Peptide sequence (MASCOT<br>Server) | Cassava EST<br>Database        | Arabidopsis Locus | Total<br>Score | E_Value   | Protein Name                                                                                                                        | Proteins<br>Abbreviation |
|---------------------------|-------------------------------------|--------------------------------|-------------------|----------------|-----------|-------------------------------------------------------------------------------------------------------------------------------------|--------------------------|
| M2_B5                     | AASFNIIPSSTGAAK +                   | Cassava.415.C3.Co<br>ntig531   | AT3G04120.1       | 582            | 2.3e-166  | GAPC-1, GAPC   GAPC<br>(GLYCERALDEHYDE-3-<br>PHOSPHATE<br>DEHYDROGENASE C<br>SUBUNIT); glyceraldehyde-3-<br>phosphate dehydrogenase | GAPC                     |
| M2_B1                     | ACMENGVLTVTVPK +                    | Cassava.2670.C1.C<br>ontig2792 | AT3G46230.1       | 138            | 4.7e-033  | ATHSP17.4 (Arabidopsis thaliana<br>heat shock protein 17.4)                                                                         | HSP17.4                  |
| M2_B1                     | ACMENGVLTVTVPKKEEVK                 | scaff_8565_1                   | AT3G46230         | 142            | 1.0e-34   | ATHSP17.4                                                                                                                           | HSP17.4                  |
| M2_B1                     | ACMENGVLTVTVPKKEEVK                 | scaff_8870_1                   | AT5G59720         | 220            | 7.0e-58   | HSP18.2                                                                                                                             | HSP18.2                  |
| M2_B4                     | AELKNGVLFISIPK                      | scaff_9466_1                   | AT4G25200         | 186            | 1.0e-47   | ATHSP23.6                                                                                                                           | HSP23.6                  |
| M2_B4                     | AELKNGVLFISIPK                      | scaff_9466_1                   | AT4G25200         | 186            | 1.0e-47   | ATHSP23.6                                                                                                                           | HSP23.6                  |
| M2_B1                     | AELKNGVLFISIPK +                    | Cassava.1282.C1.C<br>ontig1455 | AT4G27670.1       | 213            | 1.2e-055  | HSP21 (HEAT SHOCK<br>PROTEIN 21)                                                                                                    | HSP21                    |
| M2_B3                     | AGIALDNNFVK +                       | BQ994705                       | AT3G04120.1       | 392            | 0.0e-109  | GAPC, GAPC-1, GAPC1<br>(GLYCERALDEHYDE-3-<br>PHOSPHATE<br>DEHYDROGENASE C<br>SUBUNIT)                                               | GAPC                     |
| M2_B3                     | AGIALNDNFIK +                       | BE363730                       | AT3G04120.1       | 282            | 2.0e-76   | GAPC, GAPC1, GAPC-1,<br>T6K12.26, T6K12_26,<br>GLYCERALDEHYDE-3-<br>PHOSPHATE<br>DEHYDROGENASE C<br>SUBUNIT                         | GAPC                     |
| M2_B3                     | AGIALNDNFLK                         | CD848129                       | AT3G04120.1       | 264            | 1.0e-83   | GAPC, GAPC-1, GAPC1<br>(GLYCERALDEHYDE-3-<br>PHOSPHATE<br>DEHYDROGENASE C<br>SUBUNIT)                                               | GAPC                     |
| M2_B6                     | AGIALDNDFVK +                       | CO497299                       | AT5G09810.1       | 369            | 0.0 e-102 | actin 7                                                                                                                             | ACT7                     |
| M2_B5                     | AGIALNENFVK                         | scaff_9425_1                   | AT3G04120         | 140            | 4.0e-34   | GAPC                                                                                                                                | GAPC                     |
| M2_B6                     | AGIALNENFVK +                       | CV194776                       | AT1G13440.1       | 463            | 0.0 e-130 | GLYCERALDEHYDE-3-<br>PHOSPHATE<br>DEHYDROGENASE C2                                                                                  | GAPC-2                   |
| M2_B6                     | AGIALNENFVK +                       | CV194776                       | AT1G13440.1       | 463            | 0.0 e-130 | GLYCERALDEHYDE-3-<br>PHOSPHATE<br>DEHYDROGENASE C2                                                                                  | GAPC-2                   |
| M2_B1                     | AMASTPADIKEYPNSYVFII<br>DMPGLK      | CAS035_D18                     | AT3G46230         | 126            | 2.0e-47   | ATHSP17.4                                                                                                                           | HSP17.4                  |
| M2_B1                     | AMASTPADIKEYPNSYVFII<br>DMPGLK      | scaff_8870_1                   | AT5G59720         | 220            | 7.0e-58   | HSP18.2                                                                                                                             | HSP18.2                  |
| M2_B3                     | AMASTPADIKEYPNSYVFII<br>DMPGLK      | scaff_9075_1                   | AT4G10250.1       | 139            | 1.0e-33   | ATHSP22.0                                                                                                                           | HSP22.0                  |

Table S5. Contd.....

| SDS_PAG<br>E_Zone<br>Code | Peptide sequence (MASCOT<br>Server) | Cassava EST<br>Database        | Arabidopsis Locus | Total<br>Score | E_Value  | Protein Name                                                                       | Proteins<br>Abreviation |
|---------------------------|-------------------------------------|--------------------------------|-------------------|----------------|----------|------------------------------------------------------------------------------------|-------------------------|
| M2_B1                     | AMASTPADIKEYPNSYVFII<br>DMPGLK +    | Cassava.121.C1.Co<br>ntig167   | AT5G12020.1       | 161            | 4.9e-040 | HSP17.6II (17.6 KDA CLASS II<br>HEAT SHOCK PROTEIN)                                | HSP17.6II               |
| M2_B1                     | APWDIKEDENEFK +                     | Cassava.1282.C1.C<br>ontig1455 | AT4G27670.1       | 213            | 1.2e-055 | HSP21 (HEAT SHOCK<br>PROTEIN 21)                                                   | HSP21                   |
| M2_B6                     | AQDLVSSNSVVVFSK +                   | Cassava.52.C1.Cont<br>ig75     | AT5G40370.1       | 157            | 5.6e-039 | glutaredoxin, putative                                                             | glutaredoxin            |
| M2_B2                     | ASMENGVLTGTIPR +                    | BE054707                       | AT2G29500.1       | 204            | 8.0e-53  | HSP20-like chaperones<br>superfamily                                               | HSP20                   |
| M2_B2                     | ASMENGVLTVTVPK +                    | Cassava.388.C1.Co<br>ntig493   | AT5G59720.1       | 217            | 6.3e-057 | HSP18.2 (HEAT SHOCK<br>PROTEIN 18.2)                                               | HSP18.2                 |
| M2_B1                     | ASMENGVLTVTVPKEEVQ<br>KPDVK         | Cassava.859.C1.Co<br>ntig1017  | At2g29500.1       | 146            | 1.6e-035 | 17.6 kDa class I                                                                   | HSP17.6I                |
| M2_B1                     | ASMENGVLTVTVPKEEVQ<br>KPDVK         | Cassava.859.C1.Co<br>ntig1017  | AT2G29500.1       | 146            | 1.6e-035 | 17.6 kDa class I small heat shock<br>protein (HSP17.6B-CI)                         | HSP17.6I                |
| M2_B4                     | ASMENGVLTVTVPNEEIKK<br>PDVK         | CAS011_L20                     | AT1G52560.2       | 141            | 6.0e-34  | HSP20-like chaperones<br>superfamily HSP26.5 kDa class I                           | HSP26.5I                |
| M2_B1                     | ASMENGVLTVTVPREEAK                  | scaff_8565_1                   | AT3G46230.1       | 142            | 1.0e-34  | ATHSP17.4                                                                          | HSP17.4                 |
| M2_B1                     | ATMDNGVLTVTVPK                      | CAS037_L20                     | AT2G29500.1       | 162            | 2.0e-40  | 17.6 kDa class I                                                                   | HSP17.6I                |
| M2_B1                     | ATMDNGVLTVTVPK                      | scaff_8565_1                   | AT3G46230.1       | 142            | 1.0e-34  | ATHSP17.4                                                                          | HSP17.4                 |
| M2_B4                     | ATMDNGVLTVTVPK                      | scaff_9466_1                   | AT4G25200         | 186            | 1.0e-47  | ATHSP23.6                                                                          | HSP23.6                 |
| M2_B2                     | ATMDNGVLTVTVPK +                    | CV433420.                      | AT5G59720.1       | 181            | 1.0e-46  | HSP18.2   heat shock protein 18.2<br>                                              | HSP18.2                 |
| M2_B5                     | ATNLLLLENR +                        | Non Hit                        |                   |                |          |                                                                                    |                         |
| M2_B5                     | AVVTVPAYFNDSQR                      | scaff_9733_1                   | AT1G56410.1       | 355            | 5.0e-98  | heat shock protein                                                                 | ERD2,<br>HSP70T-1       |
| M2_B1                     | AVVTVPAYFNDSQR +                    | scaff_6393_1                   | AT5G02500.1       | 193            | 2.0e-58  | HSC70-1                                                                            | HSP70-1                 |
| M2_B1                     | AVVVHADPDDLKGGGHEL<br>SK            | scaff_8667_1                   | AT1G08830.1       | 276            | 1.0e-74  | CSD1                                                                               | CSD1                    |
| M2_B3                     | AVVVHADPDDLKGGGHEL<br>SK +          | Cassava.sd.2.C1.Co<br>ntig3040 | AT1G08830.1       | 243            | 7.7e-065 | CSD1 (COPPER/ZINC<br>SUPEROXIDE DISMUTASE 1);<br>copper, zinc superoxide dismutase | CSD1                    |
| M2_B1                     | DIPFPSTALSAPR                       | scaff_8565_1                   | AT3G46230.1       | 142            | 1.0e-34  | ATHSP17.4                                                                          | HSP17.4                 |
| M2_B2                     | DIPFPSTALSAPR +                     | Cassava.388.C1.Co<br>ntig493   | AT5G59720.1       | 217            | 6.3e-057 | HSP18.2 (HEAT SHOCK<br>PROTEIN 18.2)                                               | HSP18.2                 |
| M2_B5                     | EAEAVDQVSEEPVAPESD<br>APAEAVVETK +  | Cassava.sd.1.C1.Co<br>ntig3038 | 21585695          | 57             | 0.000002 | allergenic-related protein Pt2L4<br>[Manihot esculenta]                            | Pt2L4                   |
| M2_B3                     | EEEKQGEVIVTEFEFK                    | scaff_9841_1                   | AT1G20450.2       | 59             | 5.0e-09  | LTI29, LTI45, ERD10   Dehydrin<br>family                                           | ERD10                   |
| M2_B5                     | EPPAAETVVVEAPK +                    | Cassava.sd.1.C1.Co<br>ntig3038 | 21585695          | 57             | 0.000002 | allergenic-related protein Pt2L4<br>[Manihot esculenta]                            | Pt2L4                   |
| M2_B5                     | EGKLIPLLTEAGAVAK                    | scaff_10607_1                  | AT5G63030.1       | 81             | 3.0e-26  | Thioredoxin superfamily protein                                                    | glutaredoxin            |



Table S5. Contd.....

| SDS_PAG<br>E_Zone<br>Code | Peptide sequence (MASCOT<br>Server)              | Cassava EST<br>Database        | Arabidopsis Locus        | Total<br>Score | E_Value  | Protein Name                                                                               | Proteins<br>Abbreviation |
|---------------------------|--------------------------------------------------|--------------------------------|--------------------------|----------------|----------|--------------------------------------------------------------------------------------------|--------------------------|
| M2_B6                     | EGKLIPLLTEAGAVAK +                               | Cassava.52.C1.Cont<br>ig75     | AT5G40370.1              | 157            | 5.6e-039 | glutaredoxin, putative                                                                     | glutaredoxin             |
| M2_B1                     | EKPSIGTIIAVGPGPIDEEGN<br>RKPLSVSPGNTVLYSK +      | Cassava.882.C1.Co<br>ntig1045  | AT5G20720.1              | 354            | 4.9e-098 | CPN10, CHCPN10, ATCPN21,<br>CPN21, CPN20   CPN20<br>(CHAPERONIN 20); calmodulin<br>binding | CPN20                    |
| M2_B1                     | ETLDAHIFKADLPGLK                                 | scaff_7155_1                   | AT2G29500                | 175            | 2.0e-44  | 17.6 kDa class I                                                                           | HSP17.6I                 |
| M2_B1                     | ETPEAHVFEADLPGLK +                               | Cassava.859.C1.Co<br>ntig1017  | AT2G29500.1              | 146            | 1.6e-035 | 17.6 kDa class I small heat shock<br>protein (HSP17.6B-CI)                                 | HSP17.6I                 |
| M2_B2                     | ETPESHVFKADLPGLK +                               | Cassava.388.C1.Co<br>ntig493   | AT5G59720.1              | 217            | 6.3e-057 | HSP18.2 (HEAT SHOCK<br>PROTEIN 18.2)                                                       | HSP18.2                  |
| M2_B3                     | ETSAFINAR +                                      | Cassava.388.C1.Co<br>ntig493   | AT5G59720.1              | 217            | 6.3e-057 | HSP18.2 (HEAT SHOCK<br>PROTEIN 18.2)                                                       | HSP18.2                  |
| M2_B5                     | ETTEAATEAEAPAPESAPA<br>SAPETPAEEVPEKEEGDE<br>K + | Cassava.sd.1.C1.Co<br>ntig3038 | 21585695                 | 57             | 0.000002 | allergenic-related protein Pt2L4<br>[Manihot esculenta]                                    | Pt2L4                    |
| M2_B7                     | FALLVDDLK +                                      | scaff_7000_1                   | AT1G65980.1              | 272            | 1.0e-73  | thioredoxin-dependent peroxidase<br>1                                                      | TPX1                     |
| M2_B1                     | FALLVDDLKVK +                                    | scaff_7000_1                   | AT1G65980.1              | 272            | 1.0e-73  | TPX1   thioredoxin-dependent<br>peroxid                                                    | TPX1                     |
| M2_B4                     | FDMPGLSKDEVK +                                   | scaff_8720_1                   | AT4G27670.1              | 210            | 1.0e-54  | heat shock protein 21                                                                      | HSP21                    |
| M2_B1                     | FDMPGLSKEDVK +                                   | Cassava.1282.C1.C<br>ontig1455 | AT4G27670.1              | 213            | 1.2e-055 | HSP21 (HEAT SHOCK<br>PROTEIN 21)                                                           | HSP21                    |
| M2_B3                     | FHTVFDYGNLR                                      | Cassava.sd.3.C1.Co<br>ntig3041 | AT1G11910.1              | 407            | 0.0e-114 | APA1, ATAPA1   aspartic<br>proteinase A1                                                   | aspartyl<br>protease     |
| M2_B2                     | FHTVFDYGNLR                                      | CAS022_P15.r                   | AT1G62290.1              | 200            | 3.0e-52  | pepsin A [EC:3.4.23.40]                                                                    | pepsin A                 |
| M2_B3                     | FRLPENAEVDQVK                                    | scaff_9075_1                   | AT4G10250.1              | 139            | 1.0e-33  | ATHSP22.0                                                                                  | HSP22.0                  |
| M2_B1                     | FRLPENAEVDQVK +                                  | scaff_8565_1                   | AT3G46230.1              | 142            | 1.0e-34  | ATHSP17.4                                                                                  | HSP17.4                  |
| M2_B1                     | FRLPENANLDQVK                                    | scaff_6764_1                   | AT2G29500.1              | 211            | 3.0e-55  | 17.6 kDa class I                                                                           | HSP17.6I                 |
| M2_B3                     | FRLPENANMDQIR                                    | Cassava.503.C1.Co<br>ntig639   | AT5G59720.1 189<br>3e-48 | 189            | 3.0e-48  | HSP18.2   heat shock protein 18.2<br>                                                      | HSP18.11                 |
| M2_B6                     | FRLPENANMDQIR +                                  | Cassava.503.C1.Co<br>ntig639   | AT5G59720.1              | 189            | 2.3e-048 | HSP18.2 (HEAT SHOCK<br>PROTEIN 18.2)                                                       | HSP18.2                  |
| M2_B5                     | FRLPENAQVDQVK +                                  | Non hit                        |                          |                |          |                                                                                            |                          |
| M2_B5                     | GGDDAPAEVAVETK +                                 | Cassava.sd.1.C1.Co<br>ntig3038 | 21585695                 | 57             | 0.000002 | allergenic-related protein Pt2L4<br>[Manihot esculenta]                                    | Pt2L4                    |
| M2_B4                     | GLEIDPNNEALKSGLADAQ<br>AAASR +                   | CV03037A2D05.f1                | AT1G62740.1              | 269            | 1,00E-72 | stress-inducible protein                                                                   | stress-<br>inducible     |
| M2_B4                     | GLEIDPNNEALKSGLADAQ<br>AGATR                     | CAS051_I09.f                   | AT1G12270                | 205            | 1.0e-53  | stress-inducible protein                                                                   | stress-<br>inducible     |

Table S5. Contd.....

| SDS_PAG<br>E_Zone<br>Code | Peptide sequence (MASCOT<br>Server)        | Cassava EST<br>Database        | Arabidopsis Locus | Total<br>Score | E_Value  | Protein Name                                                                                                                                            | Proteins<br>Abreviation |
|---------------------------|--------------------------------------------|--------------------------------|-------------------|----------------|----------|---------------------------------------------------------------------------------------------------------------------------------------------------------|-------------------------|
| M2_B3                     | GLDFDMGKK +                                | Cassava.550.C1.Co<br>ntig687   | AT1G20450.1       | 62             | 4.6e-010 | LTI45, ERD10, LTI29  <br>ERD10/LTI45 (EARLY<br>RESPONSIVE TO<br>DEHYDRATION 10)                                                                         | ERD10                   |
| M2_B3                     | GQDGNVFFR +                                | scaff_9886_1                   | AT5G55160         | 104            | 1.0e-23  | SUM2                                                                                                                                                    | SUM2                    |
| M2_B3                     | GRVFDVTTGK +                               | scaff_6529_1                   | AT2G24940         | 170            | 5.0e-43  | ATMAPR2                                                                                                                                                 | ATMAPR2                 |
| M2_B1                     | GTMENGVLTVTPK +                            | Non Hit                        |                   |                |          |                                                                                                                                                         |                         |
| M2_B1                     | HAAEQGHAANGLDIAVR<br>+                     | Cassava.394.C2.Co<br>ntig501   | AT3G09640.1       | 376            | 1.3e-104 | APX1B   APX2 (ASCORBATE<br>PEROXIDASE 2); L-ascorbate<br>peroxidase                                                                                     | APX2                    |
| M2_B1                     | HAGDLGNVTAGDDGTASF<br>TIVDKDIPLSGPHSIVGR + | Cassava.sd.2.C1.Co<br>ntig3040 | AT1G08830.1       | 243            | 7.7e-065 | CSD1 (COPPER/ZINC<br>SUPEROXIDE DISMUTASE 1);<br>copper, zinc superoxide dismutase                                                                      | CSD1                    |
| M2_B1                     | IAGLEVL R +                                | Non Hit                        |                   |                |          |                                                                                                                                                         |                         |
| M2_B1                     | IDWKETPDAHIFK                              | CAS037_L03.f                   | AT3G46230.1       | 192            | 1.0e-49  | ATHSP17.4                                                                                                                                               | HSP17.4                 |
| M2_B1                     | IDWKETPDAHIFK                              | scaff_7380_1                   | AT5G59720.1       | 194            | 7.0e-50  | HSP18.2                                                                                                                                                 | HSP18.2                 |
| M2_B1                     | IDWKETPEAHVFQADLPG<br>L R                  | scaff_7357_1                   | AT2G29500.1       | 197            | 5.0e-51  | 17.6 kDa class I                                                                                                                                        | HSP17.6I                |
| M2_B1                     | IDWKETPEAHVFQADLPG<br>L R +                | Cassava.1764.C1.C<br>ontig1943 | AT2G29500.1       | 146            | 1.6e-035 | 17.6 kDa class I small heat shock<br>protein (HSP17.6B-CI)                                                                                              | HSP17.6I                |
| M2_B5                     | IDWKETPESHVFK +                            | Cassava.388.C1.Co<br>ntig493   | AT5G59720.1       | 217            | 6.3e-057 | HSP18.2 (HEAT SHOCK<br>PROTEIN 18.2)                                                                                                                    | HSP18.2                 |
| M2_B3                     | IEVEDGRVLQISGER                            | scaff_6708_1                   | AT4G10250.1       | 125            | 1.0e-28  | ATHSP22.0   HSP20-like<br>chaperones                                                                                                                    | HSP22.0                 |
| M2_B1                     | IEVEDGRVLQISGER +                          | scaff_8565_1                   | AT3G46230.1       | 142            | 1.0e-34  | ATHSP17.4                                                                                                                                               | HSP17.4                 |
| M2_B1                     | IFFQSDVSAPLVQR +                           | Cassava.2234.C1.C<br>ontig2395 | AT5G16550.1       | 134            | 1.3e-031 | similar to unknown [Gossypium<br>hirsutum] (GB:ABO31374.1)                                                                                              | Unkown                  |
| M2_B1                     | IINEPTAASLAYGFEK +                         | Non Hit                        |                   |                |          |                                                                                                                                                         |                         |
| M2_B5                     | IPAVQELVK +                                | Non Hit                        |                   |                |          |                                                                                                                                                         |                         |
| M2_B5                     | IPFPSTSPASR +                              | Non Hit                        |                   |                |          |                                                                                                                                                         |                         |
| M2_B5                     | IRFDMPGLSK +                               | scaff_8720_1                   | AT4G27670.1 1     | 210            | 1.0e-54  | heat shock protein 2                                                                                                                                    | HSP21                   |
| M2_B5                     | ISADFDNFR +                                | Non Hit                        |                   |                |          |                                                                                                                                                         |                         |
| M2_B4                     | IYDVTAGKSFYGGGAYS<br>MFAGK +               | Cassava.1143.C1.C<br>ontig1309 | AT2G24940.1       | 175            | 2.2e-044 | ATMAPR2   ATMAPR2<br>(ARABIDOPSIS THALIANA<br>MEMBRANE-ASSOCIATED<br>PROGESTERONE BINDING<br>PROTEIN 2); heme binding /<br>transition metal ion binding | ATMAPR2                 |
| M2_B4                     | KEEEEKPQGEVIVTEFEK +                       | Cassava.550.C1.Co<br>ntig687   | AT1G20450.1       | 62             | 4.6e-010 | LTI45, ERD10, LTI29  <br>ERD10/LTI45 (EARLY<br>RESPONSIVE TO<br>DEHYDRATION 10)                                                                         | ERD10                   |

Table S5. Contd.....

| SDS_PAG<br>E_Zone<br>Code | Peptide sequence (MASCOT<br>Server) | Cassava EST<br>Database        | Arabidopsis Locus | Total<br>Score | E_Value  | Protein Name                                                                    | Proteins<br>Abreviation |
|---------------------------|-------------------------------------|--------------------------------|-------------------|----------------|----------|---------------------------------------------------------------------------------|-------------------------|
| M2_B4                     | KVIDVEIQ +                          | Cassava.1282.C1.C<br>ontig1455 | AT4G27670.1       | 213            | 1.2e-055 | HSP21 (HEAT SHOCK<br>PROTEIN 21)                                                | HSP21                   |
| M2_B4                     | LGDFEGINETSADAVAKQ<br>EDLK +        | CK644580                       | AT2G36390.1       | 40             | 4.0e-04  | starch branching enzyme                                                         | SBE2.1, BE3             |
| M2_B2                     | LGDYLDQGI +                         | Non Hit                        |                   |                |          |                                                                                 |                         |
| M2_B1                     | LPENANMDQIR +                       | Cassava.503.C1.Co<br>ntig639   | AT5G59720.1       | 189            | 2.3e-048 | HSP18.2 (HEAT SHOCK<br>PROTEIN 18.2)                                            | HSP18.2                 |
| M2_B3                     | LRFDMPGLSK +                        | Cassava.1282.C1.C<br>ontig1455 | AT4G27670.1       | 213            | 1.2e-055 | HSP21 (HEAT SHOCK<br>PROTEIN 21)                                                | HSP21                   |
| M2_B4                     | LTPEQVEQISKQPGVLQVV<br>PSR +        | Cassava.801.C2.Co<br>ntig961   | AT1G71950.1       | 139            | 2.1e-033 | identical protein binding /<br>subtilase                                        | HSP21                   |
| M2_B1                     | LTPQQVEEISKQPGVLQVV<br>PSR          | scaff_10041_1                  | AT1G71950.1       | 139            | 2.0e-33  | identical protein binding /<br>subtilase                                        | subtilase               |
| M2_B7                     | NGVLFISIPK +                        | Cassava.1282.C1.C<br>ontig1455 | AT4G27670.1       | 213            | 1.2e-055 | HSP21 (HEAT SHOCK<br>PROTEIN 21)                                                | HSP21                   |
| M2_B7                     | NSSSVEKSYELPDGQVITIG<br>AER +       | Cassava.146.C2.Co<br>ntig201   | AT5G09810.1       | 316            | 1.3e-086 | ACT2/7, ACT7   ACT7 (actin 7)                                                   | ACT7                    |
| M2_B7                     | NYELPDGQVITIGAER +                  | CV01007B1B03.f1                | AT1G49240.1       | 451            | 2.8e-127 | ACT8   ACT8 (ACTIN 8);<br>structural constituent of<br>cytoskeleton             | ACT8                    |
| M2_B7                     | QLAVDVSFGLLDPLSPMR<br>+             | Cassava.1282.C1.C<br>ontig1455 | AT4G27670.1       | 213            | 1.2e-055 | HSP21 (HEAT SHOCK<br>PROTEIN 21)                                                | HSP21                   |
| M2_B3                     | QLEDAATLSXYNIQKESTL<br>HLVLR        | scaff_10081_1                  | AT5G03240         | 355            | 1.0e-98  | UBQ3                                                                            | UBQ3                    |
| M2_B2                     | QLEDAATLSXYNIQKESTL<br>HLVLR        | CAS030_P11.f                   | AT2G47110         | 249            | 9.0e-67  | UBQ6                                                                            | UBQ6                    |
| M2_B7                     | QLEDAATLSXYNIQKESTL<br>HLVLR +      | Cassava.2493.C1.C<br>ontig2630 | AT2G36170.1       | 245            | 1.5e-065 | ubiquitin extension protein 2<br>(UBQ2) / 60S ribosomal protein<br>L40 (RPL40A) | UBQ2                    |
| M2_B3                     | QLEDGRPLADXXIQKESTL<br>HLVLR        | Cassava.2493.C1.C<br>ontig2630 | AT3G52590.1       | 245            | 2.0e-65  | ubiquitin extension protein 2<br>(UBQ2) / 60S ribosomal protein<br>L40 (RPL40A) | UBQ2                    |
| M2_B4                     | QLEDGRPLADXXIQKESTL<br>HLVLR        | scaff_7980_1                   | AT4G05320.4       | 313            | 0.0e-158 | polyubiquitin 10                                                                | UBQ10                   |
| M2_B7                     | QMMDTMDRIFEDAMTLPG<br>SR +          | Cassava.1282.C1.C<br>ontig1455 | AT4G27670.1       | 213            | 1.2e-055 | HSP21 (HEAT SHOCK<br>PROTEIN 21)                                                | HSP21                   |
| M2_B5                     | SAEEVKVSEIVTEEAAPAV<br>EPVAEEPK +   | Cassava.sd.1.C1.Co<br>ntig3038 | 21585695          | 57             | 0.000002 | allergenic-related protein Pt2L4<br>[Manihot esculenta]                         | Pt2L4                   |
| M2_B7                     | SEFANETSANFANTR +                   | Cassava.388.C1.Co<br>ntig493   | AT5G59720.1       | 217            | 6.3e-057 | HSP18.2 (HEAT SHOCK<br>PROTEIN 18.2)                                            | HSP18.2                 |
| M2_B3                     | SELANETSANFANTR +                   | DR085468                       | AT1G07400.1       | 53             | 4.0e-08  | HSP20-like chaperones<br>superfamily                                            | HSP20                   |

Table S5. Contd.....

| SDS_PAG<br>E_Zone<br>Code | Peptide sequence (MASCOT<br>Server)   | Cassava EST<br>Database        | Arabidopsis Locus | Total<br>Score | E_Value  | Protein Name                                                                                                                                            | Proteins<br>Abreviation |
|---------------------------|---------------------------------------|--------------------------------|-------------------|----------------|----------|---------------------------------------------------------------------------------------------------------------------------------------------------------|-------------------------|
| M2_B4                     | SFYGPGGSFCMFAGK +                     | Cassava.1143.C1.C<br>ontig1309 | AT2G24940.1       | 175            | 2.2e-044 | ATMAPR2   ATMAPR2<br>(ARABIDOPSIS THALIANA<br>MEMBRANE-ASSOCIATED<br>PROGESTERONE BINDING<br>PROTEIN 2); heme binding /<br>transition metal ion binding | ATMAPR2                 |
| M2_B3                     | SFYGSGGDYSIFAGK +                     | BP582014.                      | AT2G24940.1       | 91             | 3.0e-19  | AtMAPR2, MAPR2   membrane-<br>associated                                                                                                                |                         |
| M2_B5                     | SLATIDGSAFLR +                        | Cassava.1296.C1.C<br>ontig1469 | AT3G18570.1       | 148            | 2.7e-036 | glycine-rich protein / oleosin                                                                                                                          | glycine-rich<br>protein |
| M2_B5                     | TAEETPEEETSQEAPAPET<br>VVEEAPK +      | Cassava.sd.1.C1.Co<br>ntig3038 | 21585695          | 57             | 0.000002 | allergenic-related protein Pt2L4<br>[Manihot esculenta]                                                                                                 | Pt2L4                   |
| M2_B6                     | TAGGLLLTEAAK +                        | Cassava.882.C1.Co<br>ntig1045  | AT5G20720.1       | 354            | 4.9e-098 | CPN10, CHCPN10, ATCPN21,<br>CPN21, CPN20   CPN20<br>(CHAPERONIN 20); calmodulin<br>binding                                                              | CPN20                   |
| M2_B5                     | TEEEETPKETPEPVVVK<br>+                | Cassava.sd.1.C1.Co<br>ntig3038 | 21585695          | 57             | 0.000002 | allergenic-related protein Pt2L4<br>[Manihot esculenta]                                                                                                 | Pt2L4                   |
| M2_B5                     | TFPQQAGTIR +                          | Non Hit                        |                   |                |          |                                                                                                                                                         |                         |
| M2_B1                     | TFSGLLQSSGVK +                        | CK643021                       | AT2G45470.1       | 254            | 2.0e-68  | FASCICLIN-like<br>ARABINOGALACTAN<br>PROTEIN 8                                                                                                          | FLA8, AGP8              |
| M2_B1                     | TVPNVFIGGK +                          | Cassava.52.C1.Cont<br>ig75     | AT5G40370.1       | 157            | 5.6e-039 | glutaredoxin, putative                                                                                                                                  | glutaredoxin            |
| M2_B2                     | VAEKTDDGILLPTSAQNK<br>PQGGEVVAVGEGK + | Cassava.882.C1.Co<br>ntig1045  | AT5G20720.1       | 354            | 4.9e-098 | CPN10, CHCPN10, ATCPN21,<br>CPN21, CPN20   CPN20<br>(CHAPERONIN 20); calmodulin<br>binding                                                              | CPN20                   |
| M2_B1                     | VALSDAWFEGGRGR +                      | CK644580                       | AT2G36390.1       | 40             | 4.0e-04  | starch branching enzyme<br>(EC.2.4.1.18)                                                                                                                | SBE2.1, BE3             |
| M2_B2                     | VEEGRVLQISGER                         | CAS010_O01.f                   | AT5G59720         | 171            | 3.0e-43  | HSP18.2                                                                                                                                                 | HSP18.2                 |
| M2_B1                     | VEEGRVLQISGER                         | scaff_8565_1                   | AT3G46230.1       | 142            | 1.0e-34  | ATHSP17.4                                                                                                                                               | HSP17.4                 |
| M2_B3                     | VEEGRVLQISGER                         | scaff_9075_1                   | AT4G10250         | 139            | 1.0e-33  | ATHSP22.0                                                                                                                                               | HSP22.0                 |
| M2_B1                     | VEEGRVLQISGER +                       | scaff_7357_1                   | AT2G29500.1       | 197            | 5.0e-51  | 17.6 kDa class I                                                                                                                                        | HSP17.6I                |
| M2_B1                     | VEIEDDRVLQISGER +                     | Cassava.1764.C1.C<br>ontig1943 | AT2G29500.1       | 146            | 1.6e-035 | 17.6 kDa class I small heat shock<br>protein (HSP17.6B-CI)                                                                                              | HSP17.6I                |
| M2_B2                     | VELEDGRVLQISGER +                     | Cassava.388.C1.Co<br>ntig493   | AT5G59720.1       | 217            | 6.3e-057 | HSP18.2 (HEAT SHOCK<br>PROTEIN 18.2)                                                                                                                    | HSP18.2                 |
| M2_B7                     | VEVEDRLLQISGER +                      | CV03027A2C01.f1                |                   |                |          |                                                                                                                                                         |                         |
| M2_B3                     | VEVEEDRVLQISGER +                     | scaff_6708_1                   | AT4G10250.1       | 125            | 1.0e-28  | ATHSP22.0   HSP20-like<br>chaperones                                                                                                                    | HSP22.0                 |
| M2_B3                     | VEVEEGRILQVSGER                       | Non Hit                        |                   |                |          |                                                                                                                                                         |                         |
